# Supplementary material for: Integrated analysis of label-free quantitative proteomics and bioinformatics reveal insights into signaling pathways in male breast cancer
Source: PubMed Central journal article supplement (PMC7926483; doi:10.1590/1678-4685-gmb-2019-0410), 2021-03-01
Supplement: 1415-4757-GMB-44-1-e20190410-suppl1.pdf [file 1415-4757-GMB-44-1-e20190410-suppl1.pdf]

## Supplementary Material to “Integrated analysis of label-free quantitative proteomics and bioinformatics reveal insights into signaling pathways in male breast cancer”

**Table S1** - Differentially expressed proteins identified in all groups' comparisons from the MBC case (MPT x MNT, MLN x MNT, MPT x MLN) according to the ANOVA's test. LFQ intensities were log<sub>2</sub>-transformed and normalized by width adjustment in Perseus v. 1.5.6.0. Fold changes were presented in log<sub>2</sub> values. The ANOVA p-values were adjusted by Benjamini-Hochberg FDR of 0.05.

| Protein Name                                                        | Gene Symbol    | MNT LFQ | MPT LFQ | MLN LFQ | MPT x MNT fold change | MLN x MNT fold change | MPT x MLN fold change | Gradual ↑/↓ from MNT to MPT to MLN* | ANOVA p-value |
|---------------------------------------------------------------------|----------------|---------|---------|---------|-----------------------|-----------------------|-----------------------|-------------------------------------|---------------|
| Alpha-1B-glycoprotein                                               | <i>A1BG</i>    | 2.1274  | 0.4713  | 0.4517  | -1.6561               | -1.6757               | -                     | -                                   | 1.65E-03      |
| Alpha-2-macroglobulin                                               | <i>A2M</i>     | 5.4595  | 4.3128  | 3.2431  | -1.1467               | -2.2164               | 1.0697                | ↓                                   | 3.42E-06      |
| Alpha/beta hydrolase domain-containing protein 11                   | <i>ABHD11</i>  | -2.4499 | -2.0277 | -0.5992 | -                     | 1.8507                | -1.4285               | -                                   | 1.22E-02      |
| Alpha/beta hydrolase domain-containing protein 14B                  | <i>ABHD14B</i> | 0.5174  | -1.6124 | -1.2778 | -2.1298               | -1.7953               | -                     | -                                   | 8.50E-06      |
| 3-ketoacyl-CoA thiolase, peroxisomal                                | <i>ACAA1</i>   | -3.2105 | -2.0180 | -1.5373 | 1.1925                | 1.6732                | -0.4807               | ↑                                   | 7.02E-05      |
| 3-ketoacyl-CoA thiolase, mitochondrial                              | <i>ACAA2</i>   | 1.2126  | -0.8760 | -0.8970 | -2.0886               | -2.1096               | -                     | -                                   | 5.97E-06      |
| Acetyl-CoA carboxylase 2;Biotin carboxylase                         | <i>ACACB</i>   | 0.7338  | -3.8072 | -3.7810 | -4.5410               | -4.5149               | -                     | -                                   | 2.57E-04      |
| Medium-chain specific acyl-CoA dehydrogenase, mitochondrial         | <i>ACADM</i>   | 0.4431  | -1.9845 | -1.0689 | -2.4277               | -1.5120               | -0.9157               | -                                   | 5.06E-05      |
| Short-chain specific acyl-CoA dehydrogenase, mitochondrial          | <i>ACADS</i>   | 1.0767  | -2.8929 | -2.5097 | -3.9696               | -3.5864               | -                     | -                                   | 1.53E-06      |
| Short/branched chain specific acyl-CoA dehydrogenase, mitochondrial | <i>ACADSB</i>  | -1.6947 | 0.2021  | 0.4542  | 1.8968                | 2.1490                | -0.2522               | ↑                                   | 5.96E-07      |
| Very long-chain specific acyl-CoA dehydrogenase, mitochondrial      | <i>ACADVL</i>  | 1.7282  | 1.1758  | 1.1710  | -0.5524               | -0.5572               | -                     | -                                   | 5.55E-05      |
| Cytoplasmic aconitate hydratase                                     | <i>ACO1</i>    | 1.3932  | -0.1895 | -0.4186 | -1.5827               | -1.8118               | -                     | -                                   | 5.34E-06      |
| Aconitate hydratase, mitochondrial                                  | <i>ACO2</i>    | 1.3870  | 0.8925  | 1.5844  | -0.4946               | -                     | -0.6919               | -                                   | 7.05E-03      |
| Acyl-coenzyme A thioesterase 1                                      | <i>ACOT1</i>   | 1.8228  | -0.9927 | -0.0417 | -2.8155               | -1.8645               | -0.9510               | -                                   | 8.08E-06      |

| Protein Name                                                                                                                            | Gene Symbol    | MNT LFQ | MPT LFQ | MLN LFQ | MPT x MNT fold change | MLN x MNT fold change | MPT x MLN fold change | Gradual ↑/↓ from MNT to MPT to MLN* | ANOVA p-value |
|-----------------------------------------------------------------------------------------------------------------------------------------|----------------|---------|---------|---------|-----------------------|-----------------------|-----------------------|-------------------------------------|---------------|
| Long-chain-fatty-acid--CoA ligase 1                                                                                                     | <i>ACSL1</i>   | 3.5536  | -2.4079 | -2.4161 | -5.9615               | -5.9697               | -                     | -                                   | 2.22E-06      |
| Alpha-actinin-1                                                                                                                         | <i>ACTN1</i>   | 3.0065  | 4.2385  | 3.7950  | 1.2321                | 0.7885                | 0.4436                | -                                   | 5.32E-06      |
| Alpha-actinin-4                                                                                                                         | <i>ACTN4</i>   | 2.3762  | 3.1367  | 3.0578  | 0.7605                | 0.6817                | -                     | -                                   | 8.81E-05      |
| Actin-related protein 2                                                                                                                 | <i>ACTR2</i>   | -0.3669 | 0.3385  | 0.4920  | 0.7053                | 0.8588                | -                     | -                                   | 1.23E-02      |
| Actin-related protein 3                                                                                                                 | <i>ACTR3</i>   | 0.3873  | 1.2045  | 0.8330  | 0.8172                | 0.4456                | 0.3715                | -                                   | 1.19E-03      |
| Alcohol dehydrogenase class-3                                                                                                           | <i>ADH5</i>    | 0.4225  | -1.5999 | -1.2975 | -2.0224               | -1.7200               | -                     | -                                   | 3.39E-04      |
| Adipocyte enhancer-binding protein 1                                                                                                    | <i>AEBP1</i>   | -0.8130 | 0.9414  | 0.2247  | 1.7544                | 1.0378                | 0.7166                | -                                   | 6.59E-05      |
| Afamin                                                                                                                                  | <i>AFM</i>     | 0.8953  | -1.0592 | -1.6164 | -1.9545               | -2.5116               | 0.5571                | ↓                                   | 4.64E-05      |
| Glycogen debranching enzyme;4-alpha-glucanotransferase;Amylo-alpha-1,6-glucosidase                                                      | <i>AGL</i>     | -1.0734 | 0.1243  | 0.6580  | 1.1977                | 1.7314                | -0.5337               | ↑                                   | 7.25E-05      |
| Anterior gradient protein 2 homolog                                                                                                     | <i>AGR2</i>    | -2.1493 | 1.1504  | 1.0164  | 3.2997                | 3.1658                | -                     | -                                   | 6.05E-06      |
| Angiotensinogen;Angiotensin-1;Angiotensin-2;Angiotensin-3;Angiotensin-4;Angiotensin 1-9;Angiotensin 1-7;Angiotensin 1-5;Angiotensin 1-4 | <i>AGT</i>     | 1.4353  | -0.1363 | -0.9917 | -1.5716               | -2.4271               | 0.8554                | ↓                                   | 2.63E-07      |
| Adenosylhomocysteinase                                                                                                                  | <i>AHCY</i>    | 0.7595  | 1.9245  | 2.6085  | 1.1650                | 1.8489                | -0.6839               | ↑                                   | 8.14E-07      |
| Neuroblast differentiation-associated protein AHNAK                                                                                     | <i>AHNAK</i>   | 3.6849  | 3.3279  | 3.2975  | -0.3570               | -0.3874               | -                     | -                                   | 6.21E-03      |
| Alpha-2-HS-glycoprotein;Alpha-2-HS-glycoprotein chain A;Alpha-2-HS-glycoprotein chain B                                                 | <i>AHSG</i>    | 1.1837  | -1.4220 | -3.9872 | -2.6057               | -5.1709               | 2.5652                | ↓                                   | 4.35E-07      |
| Apoptosis-inducing factor 1, mitochondrial                                                                                              | <i>AIFM1</i>   | -0.1416 | -0.6426 | -0.5005 | -0.5010               | -0.3589               | -                     | -                                   | 2.25E-02      |
| Adenylate kinase 4, mitochondrial                                                                                                       | <i>AK4</i>     | 0.3137  | -2.2435 | -3.2467 | -2.5572               | -3.5604               | -                     | -                                   | 8.26E-04      |
| Alcohol dehydrogenase [NAD(+)]                                                                                                          | <i>AKR1A1</i>  | -0.8542 | -0.4976 | -0.0383 | 0.3566                | 0.8159                | -0.4593               | ↑                                   | 1.93E-05      |
| Aflatoxin B1 aldehyde reductase member 2                                                                                                | <i>AKR7A2</i>  | 0.5199  | -0.2169 | -0.3530 | -0.7369               | -0.8730               | -                     | -                                   | 2.06E-02      |
| Retinal dehydrogenase 1                                                                                                                 | <i>ALDH1A1</i> | 1.9275  | 0.3203  | 0.1418  | -1.6072               | -1.7857               | 0.1785                | ↓                                   | 8.89E-08      |
| Aldehyde dehydrogenase X, mitochondrial                                                                                                 | <i>ALDH1B1</i> | 0.0703  | -0.3124 | -0.9843 | -                     | -1.0545               | 0.6719                | -                                   | 8.59E-03      |
| Aldehyde dehydrogenase, mitochondrial                                                                                                   | <i>ALDH2</i>   | 3.6553  | 1.5342  | 0.9643  | -2.1212               | -2.6910               | 0.5699                | ↓                                   | 4.99E-07      |

| Protein Name                                                          | Gene Symbol    | MNT Lfq | MPT Lfq | MLN Lfq | MPT x MNT fold change | MLN x MNT fold change | MPT x MLN fold change | Gradual ↑/↓ from MNT to MPT to MLN* | ANOVA p-value |
|-----------------------------------------------------------------------|----------------|---------|---------|---------|-----------------------|-----------------------|-----------------------|-------------------------------------|---------------|
| Methylmalonate-semialdehyde dehydrogenase [acylating], mitochondrial  | <i>ALDH6A1</i> | 0.1925  | -2.4772 | -2.3352 | -2.6698               | -2.5278               | -                     | -                                   | 2.46E-04      |
| 4-trimethylaminobutyraldehyde dehydrogenase                           | <i>ALDH9A1</i> | 2.4482  | 1.7597  | 1.6655  | -0.6885               | -0.7827               | -                     | -                                   | 1.12E-04      |
| Fructose-bisphosphate aldolase A;Fructose-bisphosphate aldolase       | <i>ALDOA</i>   | 2.8319  | 4.5608  | 4.3895  | 1.7289                | 1.5576                | -                     | -                                   | 6.19E-06      |
| Fructose-bisphosphate aldolase C;Fructose-bisphosphate aldolase       | <i>ALDOC</i>   | 1.6204  | 0.7722  | 0.0888  | -                     | -1.5316               | -                     | -                                   | 1.50E-02      |
| Annexin A1;Annexin                                                    | <i>ANXA1</i>   | 3.8666  | 3.3100  | 2.7190  | -0.5566               | -1.1476               | 0.5910                | ↓                                   | 2.64E-05      |
| Annexin A11                                                           | <i>ANXA11</i>  | 0.2264  | -0.1251 | -0.4952 | -0.3515               | -0.7216               | 0.3700                | ↓                                   | 1.99E-03      |
| Annexin A2;Annexin;Putative annexin A2-like protein                   | <i>ANXA2</i>   | 5.0255  | 5.3236  | 4.8826  | 0.2982                | -                     | 0.4410                | -                                   | 9.49E-03      |
| Annexin;Annexin A3                                                    | <i>ANXA3</i>   | 0.1418  | -2.6747 | -2.6454 | -2.8164               | -2.7872               | -                     | -                                   | 2.46E-04      |
| Annexin A6;Annexin                                                    | <i>ANXA6</i>   | 3.8056  | 3.6011  | 3.7589  | -0.2045               | -                     | -                     | -                                   | 4.38E-02      |
| Annexin A7                                                            | <i>ANXA7</i>   | -0.3896 | -0.4966 | -0.1035 | -                     | 0.2861                | -0.3932               | -                                   | 1.39E-02      |
| AP-1 complex subunit beta-1                                           | <i>APIB1</i>   | -2.3633 | -1.2686 | -1.0845 | 1.0946                | 1.2787                | -                     | -                                   | 5.05E-04      |
| AP-1 complex subunit gamma-1                                          | <i>APIG1</i>   | -2.5762 | -0.9982 | -1.1089 | 1.5780                | 1.4673                | -                     | -                                   | 3.20E-05      |
| AP-2 complex subunit alpha-1                                          | <i>AP2A1</i>   | -2.7381 | -2.2341 | -2.8555 | 0.5040                | -                     | 0.6214                | -                                   | 1.95E-02      |
| AP-2 complex subunit beta                                             | <i>AP2B1</i>   | 0.3221  | 0.8445  | 0.6047  | 0.5224                | -                     | -                     | -                                   | 4.77E-02      |
| Serum amyloid P-component;Serum amyloid P-component(1-203)            | <i>APCS</i>    | 2.7792  | 1.6725  | 0.5472  | -1.1067               | -2.2321               | 1.1253                | ↓                                   | 1.48E-06      |
| Acylamino-acid-releasing enzyme                                       | <i>APEH</i>    | -0.6620 | -1.1385 | -0.8207 | -0.4765               | -0.1588               | -0.3177               | -                                   | 5.73E-04      |
| Adipocyte plasma membrane-associated protein                          | <i>APMAP</i>   | 1.3387  | 0.0459  | -0.2868 | -1.2929               | -1.6256               | 0.3327                | ↓                                   | 6.69E-07      |
| Apolipoprotein A-I;Proapolipoprotein A-I;Truncated apolipoprotein A-I | <i>APOA1</i>   | 5.2728  | 4.4196  | 4.1812  | -0.8532               | -1.0916               | -                     | -                                   | 6.51E-05      |
| NAD(P)H-hydrate epimerase                                             | <i>APOA1BP</i> | -2.5453 | -1.2932 | -1.1396 | 1.2521                | 1.4058                | -                     | -                                   | 1.49E-03      |
| Apolipoprotein A-IV                                                   | <i>APOA4</i>   | 2.7655  | 1.4481  | 0.7251  | -1.3175               | -2.0405               | 0.7230                | ↓                                   | 2.48E-06      |
| Apolipoprotein B-100;Apolipoprotein B-48                              | <i>APOB</i>    | 3.1646  | 1.3936  | 0.1567  | -1.7710               | -3.0079               | 1.2369                | ↓                                   | 1.65E-07      |
| Apolipoprotein D                                                      | <i>APOD</i>    | 1.0605  | -0.9834 | -2.1300 | -2.0439               | -3.1905               | 1.1466                | ↓                                   | 1.42E-05      |

| Protein Name                                                                                                               | Gene Symbol     | MNT LFQ | MPT LFQ | MLN LFQ | MPT x MNT fold change | MLN x MNT fold change | MPT x MLN fold change | Gradual ↑/↓ from MNT to MPT to MLN* | ANOVA p-value |
|----------------------------------------------------------------------------------------------------------------------------|-----------------|---------|---------|---------|-----------------------|-----------------------|-----------------------|-------------------------------------|---------------|
| Apolipoprotein E                                                                                                           | <i>APOE</i>     | 0.8823  | -0.7092 | -0.9790 | -1.5915               | -1.8613               | -                     | -                                   | 1.12E-04      |
| Adenine phosphoribosyltransferase                                                                                          | <i>APRT</i>     | -1.8936 | -0.3706 | 0.0113  | 1.5230                | 1.9049                | -0.3818               | ↑                                   | 1.73E-06      |
| Coatomer subunit delta                                                                                                     | <i>ARCNI</i>    | -2.2693 | -0.3386 | -0.1878 | 1.9306                | 2.0815                | -                     | -                                   | 2.51E-04      |
| ADP-ribosylation factor 4                                                                                                  | <i>ARF4</i>     | -0.1004 | 0.1615  | -0.2771 | -                     | -                     | 0.4386                | -                                   | 3.38E-02      |
| Rho GTPase-activating protein 1                                                                                            | <i>ARHGAP1</i>  | 0.6297  | 0.9427  | 0.9226  | 0.3130                | 0.2929                | -                     | -                                   | 3.98E-02      |
| Actin-related protein 2/3 complex subunit 2                                                                                | <i>ARPC2</i>    | 0.1752  | 1.2154  | 0.9940  | 1.0402                | 0.8187                | -                     | -                                   | 2.08E-04      |
| Actin-related protein 2/3 complex subunit 3                                                                                | <i>ARPC3</i>    | -2.1029 | -0.9614 | -1.3502 | 1.1415                | 0.7527                | -                     | -                                   | 1.25E-02      |
| Actin-related protein 2/3 complex subunit 4                                                                                | <i>ARPC4</i>    | 0.3661  | 1.4343  | 1.2894  | 1.0683                | 0.9234                | -                     | -                                   | 6.41E-04      |
| Aspartyl/asparaginyl beta-hydroxylase                                                                                      | <i>ASPH</i>     | 0.8701  | -0.6635 | -1.7129 | -1.5336               | -2.5830               | 1.0494                | ↓                                   | 7.73E-05      |
| Asporin                                                                                                                    | <i>ASPN</i>     | 3.6409  | 2.6202  | 0.4874  | -1.0207               | -3.1535               | 2.1328                | ↓                                   | 2.14E-07      |
| Argininosuccinate synthase                                                                                                 | <i>ASS1</i>     | 0.5685  | -4.5490 | -4.9874 | -5.1176               | -5.5559               | -                     | -                                   | 3.82E-07      |
| Bifunctional purine biosynthesis protein PURH;Phosphoribosylaminoimidazolecarboxamide formyltransferase;IMP cyclohydrolase | <i>ATIC</i>     | 0.8362  | 1.1661  | 1.6919  | 0.3299                | 0.8556                | -0.5257               | ↑                                   | 2.42E-04      |
| Atlastin-3                                                                                                                 | <i>ATL3</i>     | -0.0586 | -0.8064 | -1.3944 | -0.7478               | -1.3358               | 0.5880                | ↓                                   | 1.17E-04      |
| Sodium/potassium-transporting ATPase subunit alpha-1                                                                       | <i>ATP1A1</i>   | -0.4380 | -0.0304 | 0.0781  | 0.4076                | 0.5160                | -                     | -                                   | 3.43E-03      |
| Sarcoplasmic/endoplasmic reticulum calcium ATPase 2                                                                        | <i>ATP2A2</i>   | -0.6670 | -1.0577 | -1.1166 | -0.3907               | -0.4496               | -                     | -                                   | 7.11E-04      |
| ATP synthase subunit alpha, mitochondrial                                                                                  | <i>ATP5A1</i>   | 3.5133  | 4.5284  | 4.8904  | 1.0151                | 1.3772                | -0.3621               | ↑                                   | 9.08E-07      |
| ATP synthase subunit beta, mitochondrial;ATP synthase subunit beta                                                         | <i>ATP5B</i>    | 3.5509  | 4.5284  | 4.9152  | 0.9775                | 1.3643                | -0.3869               | ↑                                   | 4.19E-06      |
| ATP synthase subunit delta, mitochondrial                                                                                  | <i>ATP5D</i>    | -1.5497 | -1.5133 | -2.5232 | -                     | -0.9736               | 1.0099                | -                                   | 2.78E-02      |
| ATP synthase subunit d, mitochondrial                                                                                      | <i>ATP5H</i>    | -1.5473 | -1.8469 | -0.6482 | -0.2995               | 0.8991                | -1.1986               | -                                   | 5.63E-05      |
| V-type proton ATPase subunit B, brain isoform                                                                              | <i>ATP6V1B2</i> | -2.5404 | -1.6347 | -1.4911 | 0.9057                | 1.0493                | -                     | -                                   | 1.18E-02      |
| Basal cell adhesion molecule                                                                                               | <i>BCAM</i>     | -0.7530 | -1.6922 | -1.1317 | -0.9393               | -0.3787               | -0.5605               | -                                   | 1.17E-03      |
| Biglycan                                                                                                                   | <i>BGN</i>      | 4.0515  | 3.5046  | 3.4603  | -0.5469               | -0.5912               | -                     | -                                   | 9.38E-03      |

| Protein Name                                                                                                                                                                                                                                                                                                                       | Gene Symbol      | MNT LFQ | MPT LFQ | MLN LFQ | MPT x MNT fold change | MLN x MNT fold change | MPT x MLN fold change | Gradual ↑/↓ from MNT to MPT to MLN* | ANOVA p-value |
|------------------------------------------------------------------------------------------------------------------------------------------------------------------------------------------------------------------------------------------------------------------------------------------------------------------------------------|------------------|---------|---------|---------|-----------------------|-----------------------|-----------------------|-------------------------------------|---------------|
| Biliverdin reductase A                                                                                                                                                                                                                                                                                                             | <i>BLVRA</i>     | 0.3015  | 0.8398  | 0.9243  | 0.5383                | 0.6228                | -                     | -                                   | 7.50E-06      |
| Flavin reductase (NADPH)                                                                                                                                                                                                                                                                                                           | <i>BLVRB</i>     | 2.4902  | 0.3637  | 0.3085  | -2.1264               | -2.1816               | -                     | -                                   | 5.31E-07      |
| Bisphosphoglycerate mutase                                                                                                                                                                                                                                                                                                         | <i>BPGM</i>      | 1.0392  | -4.1536 | -4.4148 | -5.1928               | -5.4540               | -                     | -                                   | 2.52E-08      |
| UPF0568 protein C14orf166                                                                                                                                                                                                                                                                                                          | <i>C14orf166</i> | -2.0991 | -0.9155 | -0.4954 | 1.1836                | 1.6038                | -                     | -                                   | 2.21E-04      |
| Complement C1s subcomponent;Complement C1s subcomponent heavy chain;Complement C1s subcomponent light chain                                                                                                                                                                                                                        | <i>C1S</i>       | -1.2571 | -3.0649 | -3.3103 | -1.8078               | -2.0532               | -                     | -                                   | 1.90E-04      |
| Complement C3;Complement C3 beta chain;C3-beta-c;Complement C3 alpha chain;C3a anaphylatoxin;Acylation stimulating protein;Complement C3b alpha chain;Complement C3c alpha chain fragment 1;Complement C3dg fragment;Complement C3g fragment;Complement C3d fragment;Complement C3f fragment;Complement C3c alpha chain fragment 2 | <i>C3</i>        | 5.2650  | 4.5292  | 3.6872  | -0.7358               | -1.5778               | 0.8420                | ↓                                   | 7.79E-06      |
| Complement C5;Complement C5 beta chain;Complement C5 alpha chain;C5a anaphylatoxin;Complement C5 alpha chain                                                                                                                                                                                                                       | <i>C5</i>        | 0.5269  | -2.2444 | -3.1069 | -2.7713               | -3.6338               | 0.8626                | ↓                                   | 1.94E-05      |
| Complement component C6                                                                                                                                                                                                                                                                                                            | <i>C6</i>        | -0.6589 | -2.1335 | -3.3054 | -1.4746               | -2.6465               | 1.1719                | ↓                                   | 4.31E-07      |
| Complement component C9;Complement component C9a;Complement component C9b                                                                                                                                                                                                                                                          | <i>C9</i>        | 1.2341  | -0.2493 | -0.9994 | -1.4835               | -2.2335               | 0.7500                | ↓                                   | 1.10E-05      |
| Carbonic anhydrase 1                                                                                                                                                                                                                                                                                                               | <i>CA1</i>       | 5.0484  | 1.7324  | 1.7200  | -3.3160               | -3.3284               | -                     | -                                   | 1.22E-07      |
| Carbonic anhydrase 2                                                                                                                                                                                                                                                                                                               | <i>CA2</i>       | 3.0463  | 0.4364  | 2.3018  | -2.6099               | -0.7445               | -1.8654               | -                                   | 3.57E-07      |
| Calcylin-binding protein                                                                                                                                                                                                                                                                                                           | <i>CACYBP</i>    | -1.0595 | 1.2460  | 1.5421  | 2.3055                | 2.6016                | -0.2961               | ↑                                   | 1.09E-07      |
| Calretinin                                                                                                                                                                                                                                                                                                                         | <i>CALB2</i>     | 0.6328  | -4.4251 | -4.8767 | -5.0579               | -5.5095               | -                     | -                                   | 9.60E-06      |
| Caldesmon                                                                                                                                                                                                                                                                                                                          | <i>CALD1</i>     | 1.1324  | 1.2741  | 0.4808  | -                     | -0.6516               | 0.7934                | -                                   | 2.00E-04      |
| Calreticulin                                                                                                                                                                                                                                                                                                                       | <i>CALR</i>      | -0.2689 | 0.1178  | 1.7525  | -                     | 2.0213                | -1.6347               | -                                   | 5.77E-05      |
| Cullin-associated NEDD8-dissociated protein 1                                                                                                                                                                                                                                                                                      | <i>CAND1</i>     | 1.3116  | 2.8206  | 2.6251  | 1.5090                | 1.3135                | 0.1955                | -                                   | 1.42E-06      |
| Calnexin                                                                                                                                                                                                                                                                                                                           | <i>CANX</i>      | 1.0715  | 2.5514  | 2.9265  | 1.4799                | 1.8549                | -0.3750               | ↑                                   | 2.55E-06      |

| Protein Name                                                                                                                                           | Gene Symbol     | MNT LFQ | MPT LFQ | MLN LFQ | MPT x MNT fold change | MLN x MNT fold change | MPT x MLN fold change | Gradual ↑/↓ from MNT to MPT to MLN* | ANOVA p-value |
|--------------------------------------------------------------------------------------------------------------------------------------------------------|-----------------|---------|---------|---------|-----------------------|-----------------------|-----------------------|-------------------------------------|---------------|
| Adenylyl cyclase-associated protein 1                                                                                                                  | <i>CAPI</i>     | 0.8354  | 1.5330  | 1.3791  | 0.6975                | 0.5437                | -                     | -                                   | 1.04E-03      |
| Macrophage-capping protein                                                                                                                             | <i>CAPG</i>     | -0.7206 | 1.4330  | 1.6238  | 2.1535                | 2.3444                | -0.1909               | ↑                                   | 6.80E-08      |
| F-actin-capping protein subunit alpha-1                                                                                                                | <i>CAPZA1</i>   | 0.8002  | 1.3886  | 1.4889  | 0.5884                | 0.6887                | -                     | -                                   | 1.82E-04      |
| Catalase                                                                                                                                               | <i>CAT</i>      | 3.6991  | 1.5582  | 1.5014  | -2.1409               | -2.1977               | -                     | -                                   | 2.46E-07      |
| Caveolin-1                                                                                                                                             | <i>CAV1</i>     | 2.2061  | -1.8566 | -1.9755 | -4.0627               | -4.1816               | -                     | -                                   | 4.11E-06      |
| Carbonyl reductase [NADPH] 1                                                                                                                           | <i>CBR1</i>     | 1.0251  | 0.1030  | 0.2002  | -0.9222               | -0.8249               | -                     | -                                   | 6.48E-05      |
| Chromobox protein homolog 3                                                                                                                            | <i>CBX3</i>     | -2.2486 | -0.2631 | 0.2724  | 1.9855                | 2.5210                | -                     | -                                   | 1.19E-04      |
| T-complex protein 1 subunit beta                                                                                                                       | <i>CCT2</i>     | 0.6180  | 1.5013  | 1.4102  | 0.8833                | 0.7922                | -                     | -                                   | 1.50E-03      |
| T-complex protein 1 subunit gamma                                                                                                                      | <i>CCT3</i>     | 0.3491  | 1.3694  | 1.6541  | 1.0203                | 1.3050                | -0.2847               | ↑                                   | 5.94E-06      |
| T-complex protein 1 subunit delta                                                                                                                      | <i>CCT4</i>     | 0.9158  | 1.4565  | 1.7318  | 0.5407                | 0.8160                | -0.2753               | ↑                                   | 6.17E-04      |
| T-complex protein 1 subunit epsilon                                                                                                                    | <i>CCT5</i>     | 0.0052  | 0.3595  | 0.4806  | 0.3543                | 0.4755                | -                     | -                                   | 1.54E-02      |
| T-complex protein 1 subunit zeta                                                                                                                       | <i>CCT6A</i>    | 0.4151  | 1.2086  | 1.5450  | 0.7936                | 1.1300                | -0.3364               | ↑                                   | 2.94E-04      |
| T-complex protein 1 subunit eta                                                                                                                        | <i>CCT7</i>     | 0.6045  | 0.9215  | 0.9792  | 0.3170                | 0.3747                | -                     | -                                   | 6.20E-03      |
| T-complex protein 1 subunit theta                                                                                                                      | <i>CCT8</i>     | 0.8249  | 1.5649  | 1.8674  | 0.7400                | 1.0425                | -0.3025               | ↑                                   | 3.10E-06      |
| Monocyte differentiation antigen CD14; Monocyte differentiation antigen CD14, urinary form; Monocyte differentiation antigen CD14, membrane-bound form | <i>CD14</i>     | -2.3265 | -2.6286 | -2.9852 | -                     | -0.6588               | -                     | -                                   | 1.46E-02      |
| Platelet glycoprotein 4                                                                                                                                | <i>CD36</i>     | 3.3264  | -3.9301 | -3.6375 | -7.2565               | -6.9638               | -                     | -                                   | 5.27E-08      |
| CDK5 regulatory subunit-associated protein 3                                                                                                           | <i>CDK5RAP3</i> | -3.1911 | -2.6778 | -2.3036 | -                     | 0.8875                | -                     | -                                   | 3.97E-02      |
| Liver carboxylesterase 1                                                                                                                               | <i>CES1</i>     | 1.9947  | -1.2855 | -1.8148 | -3.2802               | -3.8094               | 0.5293                | ↓                                   | 3.14E-06      |
| Complement factor B                                                                                                                                    | <i>CFB</i>      | 1.9764  | 0.8268  | -0.1684 | -1.1495               | -2.1448               | 0.9952                | ↓                                   | 5.24E-06      |
| Complement factor H                                                                                                                                    | <i>CFH</i>      | 1.8955  | 0.2190  | -1.3321 | -1.6765               | -3.2276               | 1.5511                | ↓                                   | 4.35E-06      |
| Cofilin-1                                                                                                                                              | <i>CFL1</i>     | 1.4329  | 2.6114  | 2.8536  | 1.1785                | 1.4207                | -                     | -                                   | 2.44E-05      |
| Cytoskeleton-associated protein 4                                                                                                                      | <i>CKAP4</i>    | -0.1520 | 1.4944  | 1.1412  | 1.6463                | 1.2931                | 0.3532                | -                                   | 2.90E-06      |

| Protein Name                                                                                 | Gene Symbol    | MNT LFQ | MPT LFQ | MLN LFQ | MPT x MNT fold change | MLN x MNT fold change | MPT x MLN fold change | Gradual ↑/↓ from MNT to MPT to MLN* | ANOVA p-value |
|----------------------------------------------------------------------------------------------|----------------|---------|---------|---------|-----------------------|-----------------------|-----------------------|-------------------------------------|---------------|
| Creatine kinase B-type                                                                       | <i>CKB</i>     | 1.2992  | -1.6374 | -1.7731 | -2.9366               | -3.0723               | -                     | -                                   | 1.57E-05      |
| Tetranectin                                                                                  | <i>CLEC3B</i>  | 0.6369  | -1.1834 | -1.7043 | -1.8203               | -2.3412               | 0.5209                | ↓                                   | 5.86E-05      |
| Chloride intracellular channel protein 1                                                     | <i>CLIC1</i>   | 0.7232  | 1.7251  | 1.9727  | 1.0019                | 1.2495                | -0.2476               | ↑                                   | 8.15E-06      |
| Clathrin heavy chain;Clathrin heavy chain 1                                                  | <i>CLTC</i>    | 2.6071  | 3.9076  | 4.1145  | 1.3005                | 1.5075                | -                     | -                                   | 1.82E-05      |
| Clusterin;Clusterin beta chain;Clusterin alpha chain;Clusterin                               | <i>CLU</i>     | 2.0609  | 0.7905  | 0.3132  | -1.2704               | -1.7477               | 0.4773                | ↓                                   | 1.07E-06      |
| Chymase                                                                                      | <i>CMA1</i>    | 1.0482  | -0.2228 | -4.4853 | -1.2710               | -5.5335               | 4.2625                | ↓                                   | 4.19E-05      |
| Cytosolic non-specific dipeptidase                                                           | <i>CNDP2</i>   | 0.8007  | 1.7934  | 2.5796  | 0.9928                | 1.7789                | -0.7861               | ↑                                   | 1.55E-05      |
| Calponin-1;Calponin                                                                          | <i>CNN1</i>    | 2.3538  | -0.0842 | -2.7271 | -2.4380               | -5.0809               | 2.6429                | ↓                                   | 8.57E-06      |
| Bifunctional coenzyme A synthase;Phosphopantetheine adenylyltransferase;Dephospho-CoA kinase | <i>COASY</i>   | -2.8186 | -2.0146 | -0.9187 | 0.8040                | 1.8999                | -1.0959               | ↑                                   | 3.05E-05      |
| Collagen alpha-1(XII) chain                                                                  | <i>COL12A1</i> | 2.2517  | 4.7556  | 3.0561  | 2.5039                | 0.8043                | 1.6995                | -                                   | 8.88E-09      |
| Collagen alpha-1(XIV) chain                                                                  | <i>COL14A1</i> | 3.7213  | 3.8950  | 1.7020  | -                     | -2.0193               | 2.1930                | -                                   | 2.88E-06      |
| Collagen alpha-1(XVIII) chain;Endostatin                                                     | <i>COL18A1</i> | 0.8185  | -1.4648 | -2.5465 | -2.2833               | -3.3649               | 1.0817                | ↓                                   | 4.24E-08      |
| Collagen alpha-1(I) chain                                                                    | <i>COL1A1</i>  | 3.0088  | 1.8647  | 0.4144  | -1.1441               | -2.5944               | 1.4503                | ↓                                   | 2.25E-04      |
| Collagen alpha-2(I) chain                                                                    | <i>COL1A2</i>  | 3.5030  | 2.1407  | 0.8211  | -1.3624               | -2.6819               | 1.3196                | ↓                                   | 1.05E-06      |
| Collagen alpha-1(VI) chain                                                                   | <i>COL6A1</i>  | 5.2775  | 5.2106  | 4.1513  | -                     | -1.1262               | 1.0593                | -                                   | 1.25E-04      |
| Collagen alpha-2(VI) chain                                                                   | <i>COL6A2</i>  | 4.4321  | 4.2314  | 3.2095  | -                     | -1.2226               | 1.0219                | -                                   | 4.37E-05      |
| Collagen alpha-3(VI) chain                                                                   | <i>COL6A3</i>  | 6.5381  | 7.0680  | 6.1335  | 0.5299                | -0.4046               | 0.9345                | -                                   | 8.39E-04      |
| Coatomer subunit alpha;Xenin;Proxenin                                                        | <i>COPA</i>    | 0.5966  | 1.6767  | 1.9256  | 1.0801                | 1.3290                | -0.2489               | ↑                                   | 3.11E-06      |
| Coatomer subunit beta                                                                        | <i>COPB1</i>   | -0.9751 | 0.8973  | 1.1246  | 1.8724                | 2.0997                | -                     | -                                   | 4.49E-06      |
| Coatomer subunit beta                                                                        | <i>COPB2</i>   | -1.0934 | 0.1959  | 0.2678  | 1.2892                | 1.3611                | -                     | -                                   | 1.09E-04      |
| Coatomer subunit epsilon                                                                     | <i>COPE</i>    | -0.9112 | 0.0514  | 0.3343  | 0.9625                | 1.2455                | -                     | -                                   | 8.61E-04      |
| Coatomer subunit gamma-1                                                                     | <i>COPG1</i>   | -1.4863 | 0.6920  | 0.8275  | 2.1783                | 2.3138                | -                     | -                                   | 1.40E-05      |

| Protein Name                                                                                                                  | Gene Symbol   | MNT LFQ | MPT LFQ | MLN LFQ | MPT x MNT fold change | MLN x MNT fold change | MPT x MLN fold change | Gradual ↑/↓ from MNT to MPT to MLN* | ANOVA p-value |
|-------------------------------------------------------------------------------------------------------------------------------|---------------|---------|---------|---------|-----------------------|-----------------------|-----------------------|-------------------------------------|---------------|
| Coronin-1A;Coronin                                                                                                            | <i>CORO1A</i> | -1.4657 | -0.5782 | -0.2904 | 0.8875                | 1.1754                | -                     | -                                   | 4.16E-04      |
| Coronin-1B                                                                                                                    | <i>CORO1B</i> | -1.3017 | -1.7571 | -1.6738 | -0.4553               | -0.3720               | -                     | -                                   | 3.29E-02      |
| Cytochrome c oxidase subunit 4 isoform 1, mitochondrial                                                                       | <i>COX4I1</i> | -0.9943 | -1.0083 | -2.0879 | -                     | -1.0936               | 1.0796                | -                                   | 5.56E-04      |
| Ceruloplasmin                                                                                                                 | <i>CP</i>     | 3.1347  | 1.9950  | 1.3086  | -1.1397               | -1.8262               | 0.6864                | ↓                                   | 2.18E-06      |
| Mast cell carboxypeptidase A                                                                                                  | <i>CPA3</i>   | 1.9123  | 0.3349  | -3.2596 | -1.5774               | -5.1720               | 3.5946                | ↓                                   | 2.90E-08      |
| Cellular retinoic acid-binding protein 2                                                                                      | <i>CRABP2</i> | -1.4784 | 1.4132  | 0.2527  | 2.8915                | 1.7310                | 1.1605                | -                                   | 1.75E-03      |
| Cysteine-rich protein 2                                                                                                       | <i>CRIP2</i>  | 0.2767  | -0.1845 | 0.0249  | -0.4611               | -                     | -                     | -                                   | 3.41E-02      |
| Alpha-crystallin B chain                                                                                                      | <i>CRYAB</i>  | 2.5615  | -3.3989 | -3.3540 | -5.9603               | -5.9154               | -                     | -                                   | 3.25E-07      |
| Citrate synthase;Citrate synthase, mitochondrial                                                                              | <i>CS</i>     | 2.0720  | 1.9112  | 2.6668  | -                     | 0.5948                | -0.7556               | -                                   | 1.86E-03      |
| Exportin-2                                                                                                                    | <i>CSE1L</i>  | 0.9154  | 2.7027  | 3.1500  | 1.7873                | 2.2345                | -0.4472               | ↑                                   | 4.46E-06      |
| Cysteine and glycine-rich protein 1                                                                                           | <i>CSRPI</i>  | 2.0081  | 0.7679  | -0.3464 | -1.2402               | -2.3545               | 1.1143                | ↓                                   | 1.61E-06      |
| Cystatin-A;Cystatin-A, N-terminally processed                                                                                 | <i>CSTA</i>   | 0.0320  | -3.3106 | -3.3851 | -3.3426               | -3.4171               | -                     | -                                   | 2.34E-04      |
| Catenin alpha-1                                                                                                               | <i>CTNNA1</i> | -0.9254 | 0.2302  | 0.6067  | 1.1555                | 1.5320                | -                     | -                                   | 3.52E-04      |
| Catenin delta-1                                                                                                               | <i>CTNND1</i> | -1.3851 | -0.0238 | -0.1589 | 1.3612                | 1.2261                | -                     | -                                   | 3.66E-04      |
| Cathepsin D;Cathepsin D light chain;Cathepsin D heavy chain                                                                   | <i>CTSD</i>   | 1.3822  | 3.0030  | 3.0946  | 1.6208                | 1.7124                | -                     | -                                   | 2.78E-06      |
| Cathepsin G                                                                                                                   | <i>CTSG</i>   | 0.7956  | -0.5105 | -3.6005 | -1.3061               | -4.3961               | 3.0900                | ↓                                   | 1.15E-06      |
| Cytochrome b5                                                                                                                 | <i>CYB5A</i>  | 1.8363  | 1.1150  | 0.5331  | -0.7213               | -1.3032               | 0.5819                | ↓                                   | 7.28E-04      |
| NADH-cytochrome b5 reductase 1                                                                                                | <i>CYB5R1</i> | -0.2302 | 1.4042  | 2.1158  | 1.6344                | 2.3461                | -0.7116               | ↑                                   | 2.82E-08      |
| NADH-cytochrome b5 reductase 3;NADH-cytochrome b5 reductase 3 membrane-bound form;NADH-cytochrome b5 reductase 3 soluble form | <i>CYB5R3</i> | 2.4685  | 1.6582  | 1.7380  | -0.8104               | -0.7305               | -0.0799               | -                                   | 1.50E-07      |
| Serine/threonine-protein kinase DCLK1                                                                                         | <i>DCLK1</i>  | -2.9947 | -4.0922 | -4.7423 | -1.0975               | -1.7476               | 0.6501                | ↓                                   | 3.84E-04      |
| Decorin                                                                                                                       | <i>DCN</i>    | 4.8487  | 3.5614  | 2.6302  | -1.2872               | -2.2185               | 0.9312                | ↓                                   | 1.56E-07      |



| Protein Name                                                                                                                                                           | Gene Symbol   | MNT LFQ | MPT LFQ | MLN LFQ | MPT x MNT fold change | MLN x MNT fold change | MPT x MLN fold change | Gradual ↑/↓ from MNT to MPT to MLN* | ANOVA p-value |
|------------------------------------------------------------------------------------------------------------------------------------------------------------------------|---------------|---------|---------|---------|-----------------------|-----------------------|-----------------------|-------------------------------------|---------------|
| Dynactin subunit 1                                                                                                                                                     | <i>DCTN1</i>  | -0.7151 | -1.2346 | -1.3939 | -0.5196               | -0.6789               | -                     | -                                   | 8.14E-03      |
| N(G),N(G)-dimethylarginine dimethylaminohydrolase 2                                                                                                                    | <i>DDAH2</i>  | 0.6017  | -0.8427 | -0.3443 | -1.4444               | -0.9460               | -0.4984               | -                                   | 3.74E-04      |
| DNA damage-binding protein 1                                                                                                                                           | <i>DDB1</i>   | -0.5475 | 0.0350  | 0.1102  | 0.5825                | 0.6577                | -                     | -                                   | 2.17E-02      |
| Dolichyl-diphosphooligosaccharide--protein glycosyltransferase 48 kDa subunit                                                                                          | <i>DDOST</i>  | 0.5290  | 1.1914  | 1.6540  | 0.6624                | 1.1250                | -0.4626               | ↑                                   | 3.12E-04      |
| ATP-dependent RNA helicase DDX1                                                                                                                                        | <i>DDX1</i>   | -1.3784 | -0.1390 | 0.3506  | 1.2394                | 1.7291                | -0.4896               | ↑                                   | 1.98E-05      |
| Probable ATP-dependent RNA helicase DDX17                                                                                                                              | <i>DDX17</i>  | -0.7879 | 1.1929  | 1.4026  | 1.9808                | 2.1905                | -                     | -                                   | 2.08E-03      |
| Spliceosome RNA helicase DDX39B                                                                                                                                        | <i>DDX39B</i> | 0.3976  | 1.9550  | 2.2677  | 1.5574                | 1.8701                | -0.3127               | ↑                                   | 4.92E-07      |
| Probable ATP-dependent RNA helicase DDX5                                                                                                                               | <i>DDX5</i>   | -2.3036 | -0.1424 | 0.4547  | 2.1612                | 2.7583                | -                     | -                                   | 5.14E-04      |
| 2,4-dienoyl-CoA reductase, mitochondrial                                                                                                                               | <i>DECR1</i>  | 0.8764  | 0.0789  | 0.3478  | -0.7975               | -0.5286               | -0.2688               | -                                   | 1.55E-04      |
| Dehydrogenase/reductase SDR family member 2, mitochondrial                                                                                                             | <i>DHRS2</i>  | -2.7286 | -1.1462 | 1.6987  | 1.5824                | 4.4273                | -2.8449               | ↑                                   | 1.28E-05      |
| Pre-mRNA-splicing factor ATP-dependent RNA helicase DHX15                                                                                                              | <i>DHX15</i>  | -1.6481 | 0.0145  | 0.1670  | 1.6626                | 1.8151                | -                     | -                                   | 2.62E-04      |
| ATP-dependent RNA helicase A                                                                                                                                           | <i>DHX9</i>   | 0.2750  | 1.6877  | 1.9168  | 1.4127                | 1.6418                | -0.2290               | ↑                                   | 2.11E-06      |
| H/ACA ribonucleoprotein complex subunit 4                                                                                                                              | <i>DKC1</i>   | -2.6715 | -1.1739 | -1.6745 | 1.4976                | 0.9970                | -                     | -                                   | 2.58E-02      |
| Acetyltransferase component of pyruvate dehydrogenase complex;Dihydrolipoyllysine-residue acetyltransferase component of pyruvate dehydrogenase complex, mitochondrial | <i>DLAT</i>   | -0.8366 | -1.8734 | -1.5437 | -1.0367               | -0.7071               | -0.3297               | -                                   | 1.67E-04      |
| Dihydrolipoyl dehydrogenase;Dihydrolipoyl dehydrogenase, mitochondrial                                                                                                 | <i>DLD</i>    | 0.6664  | 0.0928  | 0.6414  | -0.5736               | -                     | -0.5486               | -                                   | 5.57E-03      |
| Dihydrolipoyllysine-residue succinyltransferase component of 2-oxoglutarate dehydrogenase complex, mitochondrial                                                       | <i>DLST</i>   | 0.3807  | -0.7589 | -0.4531 | -1.1397               | -0.8338               | -                     | -                                   | 1.02E-03      |
| Dynamin-1-like protein                                                                                                                                                 | <i>DNM1L</i>  | -1.9674 | -0.9909 | -0.5569 | 0.9765                | 1.4105                | -                     | -                                   | 8.51E-03      |
| Aspartyl aminopeptidase                                                                                                                                                | <i>DNPEP</i>  | -1.3525 | -0.8128 | -0.1670 | -                     | 1.1855                | -                     | -                                   | 1.32E-02      |
| Dipeptidyl peptidase 3                                                                                                                                                 | <i>DPP3</i>   | -1.2255 | 0.3189  | 0.6763  | 1.5444                | 1.9018                | -0.3574               | ↑                                   | 1.47E-05      |

| Protein Name                                                                                    | Gene Symbol    | MNT LFQ | MPT LFQ | MLN LFQ | MPT x MNT fold change | MLN x MNT fold change | MPT x MLN fold change | Gradual ↑/↓ from MNT to MPT to MLN* | ANOVA p-value |
|-------------------------------------------------------------------------------------------------|----------------|---------|---------|---------|-----------------------|-----------------------|-----------------------|-------------------------------------|---------------|
| Dihydropyrimidinase-related protein 2                                                           | <i>DPYSL2</i>  | 2.0209  | 1.6632  | 1.5987  | -0.3577               | -0.4222               | -                     | -                                   | 2.51E-02      |
| Dihydropyrimidinase-related protein 3                                                           | <i>DPYSL3</i>  | 1.5337  | 2.2299  | 1.2430  | 0.6962                | -0.2907               | 0.9869                | -                                   | 2.17E-05      |
| Desmoplakin                                                                                     | <i>DSP</i>     | -2.3338 | 0.2624  | 0.9284  | 2.5962                | 3.2623                | -                     | -                                   | 3.44E-04      |
| Cytoplasmic dynein 1 heavy chain 1                                                              | <i>DYNC1H1</i> | 1.3246  | 0.9270  | 1.0821  | -0.3976               | -0.2425               | -                     | -                                   | 1.43E-02      |
| Delta(3,5)-Delta(2,4)-dienoyl-CoA isomerase, mitochondrial                                      | <i>ECH1</i>    | 0.5711  | -0.6142 | -0.4246 | -1.1853               | -0.9958               | -                     | -                                   | 8.60E-04      |
| Enoyl-CoA hydratase, mitochondrial                                                              | <i>ECHS1</i>   | 1.9860  | 0.0975  | 0.2648  | -1.8885               | -1.7212               | -                     | -                                   | 5.13E-05      |
| Enoyl-CoA delta isomerase 1, mitochondrial                                                      | <i>ECH1</i>    | -1.5809 | 0.2388  | 0.3379  | 1.8197                | 1.9188                | -                     | -                                   | 4.40E-05      |
| Proteasome-associated protein ECM29 homolog                                                     | <i>ECM29</i>   | -2.7608 | -1.7612 | -1.5473 | 0.9996                | 1.2135                | -                     | -                                   | 2.74E-03      |
| Elongation factor 1-delta                                                                       | <i>EEF1D</i>   | 0.2986  | 1.8765  | 2.3384  | 1.5779                | 2.0398                | -0.4619               | ↑                                   | 1.03E-05      |
| Elongation factor 1-gamma                                                                       | <i>EEF1G</i>   | 0.7650  | 1.8264  | 2.1131  | 1.0613                | 1.3481                | -0.2867               | ↑                                   | 1.59E-05      |
| Elongation factor 2                                                                             | <i>EEF2</i>    | 1.5948  | 3.0433  | 3.4179  | 1.4486                | 1.8231                | -0.3746               | ↑                                   | 9.34E-08      |
| EF-hand domain-containing protein D1                                                            | <i>EFHD1</i>   | -1.6095 | 0.5111  | 1.0039  | 2.1205                | 2.6133                | -0.4928               | ↑                                   | 1.05E-05      |
| 116 kDa U5 small nuclear ribonucleoprotein component                                            | <i>EFTUD2</i>  | -1.6382 | 0.2547  | 0.0454  | 1.8929                | 1.6836                | -                     | -                                   | 5.81E-04      |
| EH domain-containing protein 1                                                                  | <i>EHD1</i>    | -0.3444 | -1.8350 | -1.5233 | -1.4905               | -1.1789               | -                     | -                                   | 7.18E-04      |
| EH domain-containing protein 2                                                                  | <i>EHD2</i>    | 4.3360  | 1.4223  | 1.2143  | -2.9137               | -3.1218               | -                     | -                                   | 9.59E-08      |
| EH domain-containing protein 4                                                                  | <i>EHD4</i>    | -0.0869 | -0.7582 | -0.6542 | -0.6712               | -0.5673               | -                     | -                                   | 2.39E-05      |
| Interferon-induced, double-stranded RNA-activated protein kinase                                | <i>EIF2AK2</i> | -2.9656 | -1.8214 | -0.7334 | -                     | 2.2322                | -                     | -                                   | 1.20E-02      |
| Eukaryotic translation initiation factor 3 subunit A                                            | <i>EIF3A</i>   | -1.3110 | -0.4211 | -0.1130 | 0.8899                | 1.1980                | -                     | -                                   | 2.90E-04      |
| Eukaryotic translation initiation factor 3 subunit L                                            | <i>EIF3L</i>   | -1.9689 | -1.2410 | -0.9884 | 0.7279                | 0.9805                | -                     | -                                   | 1.99E-02      |
| Eukaryotic initiation factor 4A-I                                                               | <i>EIF4A1</i>  | 1.2708  | 2.7644  | 2.9490  | 1.4936                | 1.6782                | -0.1846               | ↑                                   | 1.07E-07      |
| Eukaryotic initiation factor 4A-III;Eukaryotic initiation factor 4A-III, N-terminally processed | <i>EIF4A3</i>  | -1.9222 | -0.4313 | -0.3426 | 1.4909                | 1.5796                | -                     | -                                   | 3.98E-07      |
| EMILIN-1                                                                                        | <i>EMILIN1</i> | 0.3702  | 0.0448  | -0.1900 | -0.3254               | -0.5602               | 0.2348                | ↓                                   | 2.78E-04      |

| Protein Name                                                                                                      | Gene Symbol    | MNT LFQ | MPT LFQ | MLN LFQ | MPT x MNT fold change | MLN x MNT fold change | MPT x MLN fold change | Gradual ↑/↓ from MNT to MPT to MLN* | ANOVA p-value |
|-------------------------------------------------------------------------------------------------------------------|----------------|---------|---------|---------|-----------------------|-----------------------|-----------------------|-------------------------------------|---------------|
| Alpha-enolase                                                                                                     | <i>ENO1</i>    | 3.0798  | 4.1354  | 3.7672  | 1.0556                | 0.6874                | 0.3682                | -                                   | 9.97E-05      |
| Enolase-phosphatase E1                                                                                            | <i>ENOPH1</i>  | -2.4804 | -2.2957 | -0.8616 | -                     | 1.6188                | -1.4341               | -                                   | 2.26E-04      |
| Epoxide hydrolase 1                                                                                               | <i>EPHX1</i>   | 2.9077  | 1.6366  | 0.7861  | -1.2711               | -2.1216               | 0.8505                | ↓                                   | 2.50E-06      |
| Bifunctional glutamate/proline--tRNA ligase;Glutamate--tRNA ligase;Proline--tRNA ligase                           | <i>EPRS</i>    | -1.0629 | -0.1484 | 0.6263  | 0.9145                | 1.6892                | -0.7747               | ↑                                   | 1.43E-05      |
| Endoplasmic reticulum aminopeptidase 1                                                                            | <i>ERAP1</i>   | -0.7699 | -1.9385 | -2.0251 | -1.1685               | -1.2552               | -                     | -                                   | 3.17E-04      |
| Erlin-2                                                                                                           | <i>ERLIN2</i>  | 0.2627  | -0.7239 | -0.6366 | -0.9866               | -0.8993               | -                     | -                                   | 4.80E-03      |
| Endoplasmic reticulum resident protein 29                                                                         | <i>ERP29</i>   | -0.4073 | 0.3785  | 0.8898  | 0.7857                | 1.2970                | -0.5113               | ↑                                   | 1.01E-04      |
| S-formylglutathione hydrolase                                                                                     | <i>ESD</i>     | -0.5547 | -1.5996 | -1.4946 | -1.0449               | -0.9398               | -                     | -                                   | 1.95E-03      |
| Extended synaptotagmin-1                                                                                          | <i>ESYT1</i>   | 1.7720  | 0.7571  | 0.9225  | -1.0149               | -0.8494               | -                     | -                                   | 8.42E-05      |
| Extended synaptotagmin-2                                                                                          | <i>ESYT2</i>   | -2.8909 | -3.7152 | -4.5662 | -0.8243               | -1.6753               | 0.8511                | ↓                                   | 1.19E-03      |
| Electron transfer flavoprotein subunit alpha, mitochondrial                                                       | <i>ETF A</i>   | 0.5007  | -0.8766 | -0.1289 | -1.3773               | -0.6295               | -0.7477               | -                                   | 4.24E-04      |
| Electron transfer flavoprotein subunit beta                                                                       | <i>ETF B</i>   | 0.9740  | -1.0932 | -0.3484 | -2.0672               | -1.3225               | -0.7447               | -                                   | 3.12E-05      |
| Ezrin                                                                                                             | <i>EZR</i>     | -2.1635 | -0.0784 | 0.6321  | 2.0851                | 2.7957                | -                     | -                                   | 7.20E-03      |
| Coagulation factor XIII A chain                                                                                   | <i>F13A1</i>   | 1.4560  | 0.6840  | -0.6327 | -0.7720               | -2.0887               | 1.3167                | ↓                                   | 4.54E-06      |
| Prothrombin;Activation peptide fragment 1;Activation peptide fragment 2;Thrombin light chain;Thrombin heavy chain | <i>F2</i>      | 0.8241  | -1.3182 | -1.6662 | -2.1423               | -2.4903               | 0.3480                | ↓                                   | 4.02E-08      |
| Fatty acid-binding protein, adipocyte                                                                             | <i>FABP4</i>   | 4.4484  | -1.4501 | -1.6527 | -5.8985               | -6.1011               | -                     | -                                   | 2.84E-07      |
| Fumarylacetoacetase                                                                                               | <i>FAH</i>     | 1.3862  | -1.7393 | -2.1171 | -3.1256               | -3.5034               | -                     | -                                   | 1.01E-05      |
| Acylpyruvase FAHD1, mitochondrial                                                                                 | <i>FAHD1</i>   | -2.7548 | -2.5783 | -1.8652 | -                     | 0.8897                | -0.7132               | -                                   | 2.98E-02      |
| Redox-regulatory protein FAM213A                                                                                  | <i>FAM213A</i> | 1.5102  | -2.4306 | -1.6723 | -3.9408               | -3.1824               | -0.7583               | -                                   | 8.36E-06      |
| Phenylalanine--tRNA ligase beta subunit                                                                           | <i>FARSB</i>   | -1.3888 | 0.0911  | 0.0159  | 1.4799                | 1.4048                | -                     | -                                   | 3.53E-05      |
| Fatty acid synthase;[Acyl-carrier-protein] S-acetyltransferase;[Acyl-carrier-protein] S-                          | <i>FASN</i>    | 5.0826  | 7.0661  | 8.2690  | 1.9835                | 3.1863                | -1.2028               | ↑                                   | 8.32E-08      |

| Protein Name                                                                                                                                                                                                                            | Gene Symbol  | MNT LFQ | MPT LFQ | MLN LFQ | MPT x MNT fold change | MLN x MNT fold change | MPT x MLN fold change | Gradual ↑/↓ from MNT to MPT to MLN* | ANOVA p-value |
|-----------------------------------------------------------------------------------------------------------------------------------------------------------------------------------------------------------------------------------------|--------------|---------|---------|---------|-----------------------|-----------------------|-----------------------|-------------------------------------|---------------|
| malonyltransferase;3-oxoacyl-[acyl-carrier-protein] synthase;3-oxoacyl-[acyl-carrier-protein] reductase;3-hydroxyacyl-[acyl-carrier-protein] dehydratase;Enoyl-[acyl-carrier-protein] reductase;Oleoyl-[acyl-carrier-protein] hydrolase |              |         |         |         |                       |                       |                       |                                     |               |
| rRNA 2-O-methyltransferase fibrillar                                                                                                                                                                                                    | <i>FBL</i>   | -1.0720 | 1.1000  | 0.8973  | 2.1720                | 1.9693                | -                     | -                                   | 8.03E-06      |
| Fibulin-1                                                                                                                                                                                                                               | <i>FBLN1</i> | 1.1760  | 0.9668  | -0.3748 | -0.2092               | -1.5508               | 1.3416                | ↓                                   | 2.57E-06      |
| Fibulin-2                                                                                                                                                                                                                               | <i>FBLN2</i> | 0.7209  | -0.4982 | -1.3368 | -1.2190               | -2.0577               | 0.8386                | ↓                                   | 7.06E-04      |
| Fibrillin-1                                                                                                                                                                                                                             | <i>FBN1</i>  | 3.1729  | 0.9808  | 0.1689  | -2.1921               | -3.0040               | 0.8119                | ↓                                   | 3.59E-05      |
| Fibrinogen alpha chain;Fibrinopeptide A;Fibrinogen alpha chain                                                                                                                                                                          | <i>FGA</i>   | 4.0661  | 2.9448  | 1.8006  | -1.1213               | -2.2655               | 1.1442                | ↓                                   | 6.45E-07      |
| Fibrinogen beta chain;Fibrinopeptide B;Fibrinogen beta chain                                                                                                                                                                            | <i>FGB</i>   | 4.5556  | 3.3822  | 2.3081  | -1.1734               | -2.2474               | 1.0740                | ↓                                   | 4.95E-06      |
| Fibrinogen gamma chain                                                                                                                                                                                                                  | <i>FGG</i>   | 4.8085  | 3.2972  | 2.4295  | -1.5113               | -2.3790               | 0.8676                | ↓                                   | 5.40E-07      |
| Fumarate hydratase, mitochondrial                                                                                                                                                                                                       | <i>FH</i>    | 0.5770  | 0.8941  | 1.4065  | -                     | 0.8295                | -0.5124               | -                                   | 4.00E-03      |
| Peptidyl-prolyl cis-trans isomerase FKBP4;Peptidyl-prolyl cis-trans isomerase FKBP4, N-terminally processed                                                                                                                             | <i>FKBP4</i> | 0.0301  | 3.1529  | 4.0059  | 3.1227                | 3.9758                | -0.8530               | ↑                                   | 3.46E-10      |
| FAD synthase;Molybdenum cofactor biosynthesis protein-like region;FAD synthase region                                                                                                                                                   | <i>FLAD1</i> | -4.9817 | -3.7019 | -3.2854 | 1.2798                | 1.6963                | -0.4165               | ↑                                   | 1.84E-06      |
| Protein flightless-1 homolog                                                                                                                                                                                                            | <i>FLII</i>  | -3.3578 | -2.4176 | -2.9755 | 0.9402                | 0.3824                | 0.5579                | -                                   | 8.02E-04      |
| Filamin-A                                                                                                                                                                                                                               | <i>FLNA</i>  | 4.7221  | 5.1691  | 4.5308  | 0.4470                | -                     | 0.6383                | -                                   | 2.01E-03      |
| Fibromodulin                                                                                                                                                                                                                            | <i>FMOD</i>  | 0.7103  | -2.1584 | -4.1646 | -2.8687               | -4.8750               | 2.0062                | ↓                                   | 1.78E-05      |
| Fibronectin;Anastellin;Ugl-Y1;Ugl-Y2;Ugl-Y3                                                                                                                                                                                             | <i>FNI</i>   | 3.2214  | 4.7464  | 3.3456  | 1.5250                | -                     | 1.4008                | -                                   | 3.57E-07      |
| Fascin                                                                                                                                                                                                                                  | <i>FSCN1</i> | 0.8727  | 0.7709  | -0.3632 | -                     | -1.2359               | 1.1341                | -                                   | 7.94E-05      |
| Ferritin light chain                                                                                                                                                                                                                    | <i>FTL</i>   | 1.3827  | 2.8084  | 2.9146  | 1.4257                | 1.5319                | -                     | -                                   | 1.35E-04      |
| Glucose-6-phosphate 1-dehydrogenase                                                                                                                                                                                                     | <i>G6PD</i>  | 1.1896  | 1.6067  | 1.1139  | 0.4171                | -                     | 0.4928                | -                                   | 7.61E-04      |
| Neutral alpha-glucosidase AB                                                                                                                                                                                                            | <i>GANAB</i> | 1.9116  | 2.9286  | 3.0964  | 1.0169                | 1.1848                | -0.1678               | ↑                                   | 1.02E-07      |

| Protein Name                                                                                                                              | Gene Symbol   | MNT LFQ | MPT LFQ | MLN LFQ | MPT x MNT fold change | MLN x MNT fold change | MPT x MLN fold change | Gradual ↑/↓ from MNT to MPT to MLN* | ANOVA p-value |
|-------------------------------------------------------------------------------------------------------------------------------------------|---------------|---------|---------|---------|-----------------------|-----------------------|-----------------------|-------------------------------------|---------------|
| Glyceraldehyde-3-phosphate dehydrogenase                                                                                                  | <i>GAPDH</i>  | 3.4778  | 5.5608  | 5.5527  | 2.0830                | 2.0749                | -                     | -                                   | 1.56E-05      |
| Glycine--tRNA ligase                                                                                                                      | <i>GARS</i>   | -1.9288 | -0.3239 | -0.6221 | 1.6050                | 1.3067                | -                     | -                                   | 3.31E-05      |
| Vitamin D-binding protein                                                                                                                 | <i>GC</i>     | 3.0011  | 1.7854  | 1.0065  | -1.2157               | -1.9946               | 0.7789                | ↓                                   | 2.91E-07      |
| Rab GDP dissociation inhibitor alpha                                                                                                      | <i>GDI1</i>   | -1.1212 | 0.6636  | 0.6986  | 1.7849                | 1.8199                | -                     | -                                   | 1.59E-04      |
| Rab GDP dissociation inhibitor beta                                                                                                       | <i>GDI2</i>   | 1.5563  | 2.2982  | 2.2587  | 0.7419                | 0.7025                | -                     | -                                   | 5.45E-04      |
| Lactoylglutathione lyase                                                                                                                  | <i>GLO1</i>   | -1.2707 | -1.9585 | -1.2340 | -0.6878               | -                     | -0.7245               | -                                   | 1.44E-02      |
| Glutaredoxin-3                                                                                                                            | <i>GLRX3</i>  | -1.6742 | -2.6373 | -2.4271 | -0.9631               | -0.7529               | -                     | -                                   | 8.65E-03      |
| Glutamine synthetase                                                                                                                      | <i>GLUL</i>   | -1.2067 | 1.8061  | 2.0885  | 3.0128                | 3.2952                | -                     | -                                   | 4.64E-06      |
| Guanine nucleotide-binding protein G(i) subunit alpha-2                                                                                   | <i>GNAI2</i>  | 2.2444  | 1.2114  | 1.1128  | -1.0330               | -1.1316               | -                     | -                                   | 9.79E-04      |
| Guanine nucleotide-binding protein G(k) subunit alpha                                                                                     | <i>GNAI3</i>  | -2.1995 | -3.0566 | -3.0790 | -0.8571               | -0.8795               | -                     | -                                   | 3.23E-03      |
| Guanine nucleotide-binding protein G(s) subunit alpha isoforms short;Guanine nucleotide-binding protein G(s) subunit alpha isoforms XLas  | <i>GNAS</i>   | 0.2171  | -1.0748 | -1.2133 | -1.2919               | -1.4304               | -                     | -                                   | 1.43E-04      |
| Guanine nucleotide-binding protein subunit beta-2-like 1;Guanine nucleotide-binding protein subunit beta-2-like 1, N-terminally processed | <i>GNB2L1</i> | -0.1677 | 0.7601  | 1.3246  | 0.9277                | 1.4922                | -0.5645               | ↑                                   | 7.31E-04      |
| Vesicle transport protein GOT1B                                                                                                           | <i>GOLT1B</i> | -4.6596 | -3.3332 | -3.4647 | 1.3264                | 1.1950                | -                     | -                                   | 6.41E-04      |
| Aspartate aminotransferase, cytoplasmic                                                                                                   | <i>GOT1</i>   | -1.2241 | -1.6578 | -1.5922 | -0.4338               | -0.3681               | -                     | -                                   | 2.53E-02      |
| Aspartate aminotransferase, mitochondrial                                                                                                 | <i>GOT2</i>   | -1.1021 | 1.9629  | 2.6586  | 3.0650                | 3.7607                | -0.6957               | ↑                                   | 1.24E-06      |
| Glycerol-3-phosphate dehydrogenase [NAD(+)], cytoplasmic                                                                                  | <i>GPD1</i>   | 4.2765  | -3.6608 | -3.2919 | -7.9373               | -7.5684               | -                     | -                                   | 2.36E-05      |
| Glycerol-3-phosphate dehydrogenase 1-like protein                                                                                         | <i>GPD1L</i>  | -1.1238 | -1.8412 | -1.3703 | -0.7174               | -0.2465               | -0.4709               | -                                   | 4.99E-04      |
| Glycerol-3-phosphate dehydrogenase, mitochondrial                                                                                         | <i>GPD2</i>   | -1.4381 | 0.0917  | 0.6423  | 1.5298                | 2.0804                | -0.5506               | ↑                                   | 7.14E-07      |
| Glucose-6-phosphate isomerase                                                                                                             | <i>GPI</i>    | 2.7014  | 2.3541  | 1.9539  | -0.3473               | -0.7475               | 0.4002                | ↓                                   | 4.56E-04      |
| Glutathione peroxidase;Glutathione peroxidase 3                                                                                           | <i>GPX3</i>   | 0.3461  | -1.4208 | -1.4885 | -1.7669               | -1.8346               | -                     | -                                   | 8.68E-07      |

| Protein Name                                                                                                                | Gene Symbol     | MNT LFQ | MPT LFQ | MLN LFQ | MPT x MNT fold change | MLN x MNT fold change | MPT x MLN fold change | Gradual ↑/↓ from MNT to MPT to MLN* | ANOVA p-value |
|-----------------------------------------------------------------------------------------------------------------------------|-----------------|---------|---------|---------|-----------------------|-----------------------|-----------------------|-------------------------------------|---------------|
| Gelsolin                                                                                                                    | <i>GSN</i>      | 2.9890  | 2.7440  | 2.5006  | -0.2450               | -0.4884               | 0.2434                | ↓                                   | 3.08E-03      |
| Glutathione S-transferase kappa 1                                                                                           | <i>GSTK1</i>    | -0.5620 | 0.7988  | 1.2228  | 1.3609                | 1.7849                | -0.4240               | ↑                                   | 5.66E-07      |
| Glutathione S-transferase Mu 3                                                                                              | <i>GSTM3</i>    | -0.1602 | 0.5658  | 1.4627  | 0.7260                | 1.6229                | -0.8968               | ↑                                   | 1.45E-04      |
| Glutathione S-transferase omega-1                                                                                           | <i>GSTO1</i>    | -0.5978 | -0.4033 | -0.8164 | -                     | -                     | 0.4132                | -                                   | 1.87E-02      |
| Glutathione S-transferase P                                                                                                 | <i>GSTP1</i>    | 2.4460  | 1.9107  | 2.4446  | -0.5354               | -                     | -0.5339               | -                                   | 2.04E-03      |
| Histone H1.0;Histone H1.0, N-terminally processed                                                                           | <i>H1FO</i>     | -2.2492 | -0.0541 | -2.0838 | 2.1950                | -                     | 2.0296                | -                                   | 5.98E-05      |
| Histone H1x                                                                                                                 | <i>H1FX</i>     | -1.8169 | -0.3185 | 0.3642  | 1.4984                | 2.1811                | -0.6827               | ↑                                   | 6.09E-05      |
| Core histone macro-H2A.1;Histone H2A                                                                                        | <i>H2AFY</i>    | 0.7714  | 2.6676  | 2.9392  | 1.8961                | 2.1678                | -                     | -                                   | 6.84E-06      |
| Very-long-chain (3R)-3-hydroxyacyl-CoA dehydratase 3                                                                        | <i>HACD3</i>    | -0.9737 | -0.0240 | -0.0628 | 0.9497                | 0.9109                | -                     | -                                   | 8.09E-03      |
| Hydroxyacyl-coenzyme A dehydrogenase, mitochondrial                                                                         | <i>HADH</i>     | 1.5491  | -0.7814 | -0.8059 | -2.3306               | -2.3551               | -                     | -                                   | 2.56E-07      |
| Trifunctional enzyme subunit alpha, mitochondrial;Long-chain enoyl-CoA hydratase;Long chain 3-hydroxyacyl-CoA dehydrogenase | <i>HADHA</i>    | 2.1939  | 2.2551  | 2.5327  | -                     | 0.3387                | -0.2776               | -                                   | 3.68E-03      |
| Trifunctional enzyme subunit beta, mitochondrial;3-ketoacyl-CoA thiolase                                                    | <i>HADHB</i>    | 2.2191  | 2.0540  | 1.9002  | -                     | -0.3189               | -                     | -                                   | 2.02E-02      |
| Hemoglobin subunit beta;LVV-hemorphin-7;Spinorphin                                                                          | <i>HBB</i>      | 7.3422  | 5.8682  | 5.6443  | -1.4740               | -1.6978               | -                     | -                                   | 1.20E-04      |
| Hemoglobin subunit delta                                                                                                    | <i>HBD</i>      | 4.0726  | 0.6782  | 0.4969  | -3.3944               | -3.5756               | -                     | -                                   | 4.39E-07      |
| Vigilin                                                                                                                     | <i>HDLBP</i>    | -0.5045 | 1.1435  | 1.2119  | 1.6480                | 1.7164                | -                     | -                                   | 1.68E-06      |
| Heme-binding protein 2                                                                                                      | <i>HEBP2</i>    | -0.4428 | -1.2396 | -1.0016 | -0.7969               | -0.5588               | -                     | -                                   | 7.57E-04      |
| Histidine triad nucleotide-binding protein 1                                                                                | <i>HINT1</i>    | -0.6726 | -0.7714 | -1.3494 | -                     | -0.6768               | 0.5780                | -                                   | 2.06E-03      |
| Histone H1.4                                                                                                                | <i>HIST1H1E</i> | 1.3525  | 3.1284  | 2.7652  | 1.7759                | 1.4127                | 0.3632                | -                                   | 2.69E-05      |
| Histone H4                                                                                                                  | <i>HIST1H4A</i> | 4.3949  | 5.7922  | 5.9874  | 1.3973                | 1.5925                | -                     | -                                   | 4.32E-05      |
| Hexokinase-1                                                                                                                | <i>HK1</i>      | 0.0970  | 0.5678  | 0.7853  | 0.4708                | 0.6883                | -                     | -                                   | 1.32E-03      |

| Protein Name                                                                                                | Gene Symbol      | MNT LFQ | MPT LFQ | MLN LFQ | MPT x MNT fold change | MLN x MNT fold change | MPT x MLN fold change | Gradual ↑/↓ from MNT to MPT to MLN* | ANOVA p-value |
|-------------------------------------------------------------------------------------------------------------|------------------|---------|---------|---------|-----------------------|-----------------------|-----------------------|-------------------------------------|---------------|
| High mobility group protein B1                                                                              | <i>HMGB1</i>     | 0.8856  | 1.7278  | 2.4397  | 0.8422                | 1.5541                | -0.7119               | ↑                                   | 1.13E-03      |
| High mobility group protein B2                                                                              | <i>HMGB2</i>     | -1.3636 | -1.8441 | -2.2828 | -                     | -0.9192               | -                     | -                                   | 3.73E-02      |
| Heterogeneous nuclear ribonucleoprotein A0                                                                  | <i>HNRNPA0</i>   | -1.1497 | 0.0411  | -0.0172 | 1.1908                | 1.1325                | -                     | -                                   | 1.32E-03      |
| Heterogeneous nuclear ribonucleoproteins A2/B1                                                              | <i>HNRNPA2B1</i> | 1.7605  | 3.6290  | 4.0310  | 1.8684                | 2.2705                | -0.4020               | ↑                                   | 2.21E-06      |
| Heterogeneous nuclear ribonucleoprotein A/B                                                                 | <i>HNRNPAB</i>   | -2.0178 | -0.0618 | 0.6043  | 1.9560                | 2.6220                | -0.6661               | ↑                                   | 7.64E-07      |
| Heterogeneous nuclear ribonucleoprotein D0                                                                  | <i>HNRNPD</i>    | -0.4755 | 1.1953  | 1.6322  | 1.6709                | 2.1077                | -0.4369               | ↑                                   | 6.21E-06      |
| Heterogeneous nuclear ribonucleoprotein F;Heterogeneous nuclear ribonucleoprotein F, N-terminally processed | <i>HNRNPF</i>    | -2.3970 | -1.3955 | -1.6988 | 1.0014                | 0.6982                | -                     | -                                   | 3.05E-02      |
| Heterogeneous nuclear ribonucleoprotein H;Heterogeneous nuclear ribonucleoprotein H, N-terminally processed | <i>HNRNPH1</i>   | 0.4190  | 1.8560  | 1.6151  | 1.4370                | 1.1961                | -                     | -                                   | 2.96E-05      |
| Heterogeneous nuclear ribonucleoprotein K                                                                   | <i>HNRNPK</i>    | 1.2137  | 2.7245  | 3.1825  | 1.5108                | 1.9689                | -0.4581               | ↑                                   | 8.03E-09      |
| Heterogeneous nuclear ribonucleoprotein L                                                                   | <i>HNRNPL</i>    | -2.2217 | -0.0321 | 0.6497  | 2.1896                | 2.8714                | -                     | -                                   | 9.81E-03      |
| Heterogeneous nuclear ribonucleoprotein M                                                                   | <i>HNRNPM</i>    | -0.0239 | 1.7429  | 2.1221  | 1.7668                | 2.1461                | -0.3792               | ↑                                   | 3.55E-07      |
| Heterogeneous nuclear ribonucleoprotein R                                                                   | <i>HNRNPR</i>    | -1.0986 | 0.7117  | 0.9358  | 1.8102                | 2.0344                | -0.2241               | ↑                                   | 6.04E-08      |
| Heterogeneous nuclear ribonucleoprotein U                                                                   | <i>HNRNPU</i>    | 0.9576  | 2.5463  | 2.7393  | 1.5887                | 1.7817                | -                     | -                                   | 1.34E-05      |
| Haptoglobin;Haptoglobin alpha chain;Haptoglobin beta chain                                                  | <i>HP</i>        | 2.5337  | 0.5639  | -0.3585 | -1.9698               | -2.8923               | 0.9225                | ↓                                   | 6.22E-05      |
| Hypoxanthine-guanine phosphoribosyltransferase                                                              | <i>HPRT1</i>     | -0.5232 | -0.6208 | -0.0528 | -                     | 0.4705                | -0.5680               | -                                   | 3.81E-03      |
| Histidine-rich glycoprotein                                                                                 | <i>HRG</i>       | 2.2502  | 0.6469  | 0.0558  | -1.6033               | -2.1944               | 0.5911                | ↓                                   | 1.39E-07      |
| 3-hydroxyacyl-CoA dehydrogenase type-2                                                                      | <i>HSD17B10</i>  | 0.0835  | 0.4830  | 0.6408  | 0.3995                | 0.5573                | -                     | -                                   | 9.23E-03      |
| Very-long-chain 3-oxoacyl-CoA reductase                                                                     | <i>HSD17B12</i>  | -0.9438 | -1.9416 | -2.0038 | -0.9978               | -1.0600               | -                     | -                                   | 3.10E-03      |
| Peroxisomal multifunctional enzyme type 2;(3R)-hydroxyacyl-CoA dehydrogenase;Enoyl-CoA hydratase 2          | <i>HSD17B4</i>   | -0.0531 | 1.2132  | 1.0847  | 1.2664                | 1.1379                | -                     | -                                   | 8.13E-06      |
| Hydroxysteroid dehydrogenase-like protein 2                                                                 | <i>HSDL2</i>     | -1.0189 | -1.6929 | -1.5860 | -0.6740               | -0.5671               | -                     | -                                   | 2.43E-02      |

| Protein Name                                                                                  | Gene Symbol     | MNT LFQ | MPT LFQ | MLN LFQ | MPT x MNT fold change | MLN x MNT fold change | MPT x MLN fold change | Gradual ↑/↓ from MNT to MPT to MLN* | ANOVA p-value |
|-----------------------------------------------------------------------------------------------|-----------------|---------|---------|---------|-----------------------|-----------------------|-----------------------|-------------------------------------|---------------|
| Heat shock protein HSP 90-alpha                                                               | <i>HSP90AA1</i> | 3.2094  | 5.3977  | 6.1426  | 2.1883                | 2.9332                | -0.7449               | ↑                                   | 3.26E-06      |
| Heat shock protein HSP 90-beta;Putative heat shock protein HSP 90-beta-3                      | <i>HSP90AB1</i> | 2.2352  | 4.4685  | 5.1209  | 2.2333                | 2.8857                | -0.6524               | ↑                                   | 2.57E-07      |
| Endoplasmic                                                                                   | <i>HSP90B1</i>  | 2.5370  | 3.8510  | 4.9262  | 1.3139                | 2.3891                | -1.0752               | ↑                                   | 2.26E-07      |
| Heat shock 70 kDa protein 12A                                                                 | <i>HSPA12A</i>  | 0.3873  | -3.8718 | -3.9580 | -4.2591               | -4.3453               | -                     | -                                   | 5.67E-05      |
| Heat shock-related 70 kDa protein 2                                                           | <i>HSPA2</i>    | -1.8665 | -1.3039 | -1.2402 | 0.5626                | 0.6263                | -                     | -                                   | 2.45E-03      |
| Heat shock 70 kDa protein 4                                                                   | <i>HSPA4</i>    | -0.7943 | -0.0234 | 0.3032  | 0.7710                | 1.0975                | -                     | -                                   | 2.79E-03      |
| 78 kDa glucose-regulated protein                                                              | <i>HSPA5</i>    | 2.5182  | 4.1380  | 4.8827  | 1.6198                | 2.3645                | -0.7447               | ↑                                   | 1.80E-08      |
| Heat shock cognate 71 kDa protein                                                             | <i>HSPA8</i>    | 3.5477  | 5.2105  | 5.7345  | 1.6628                | 2.1868                | -0.5240               | ↑                                   | 3.01E-07      |
| Stress-70 protein, mitochondrial                                                              | <i>HSPA9</i>    | 1.3598  | 3.5990  | 4.4452  | 2.2392                | 3.0854                | -0.8462               | ↑                                   | 3.73E-08      |
| Heat shock protein beta-1                                                                     | <i>HSPB1</i>    | 2.9881  | 4.6570  | 5.1939  | 1.6689                | 2.2058                | -0.5368               | ↑                                   | 2.16E-06      |
| 60 kDa heat shock protein, mitochondrial                                                      | <i>HSPD1</i>    | 2.2468  | 4.3677  | 5.0749  | 2.1209                | 2.8281                | -0.7073               | ↑                                   | 4.36E-07      |
| 10 kDa heat shock protein, mitochondrial                                                      | <i>HSPE1</i>    | 0.2211  | 1.5843  | 1.5184  | 1.3633                | 1.2974                | -                     | -                                   | 1.56E-05      |
| Basement membrane-specific heparan sulfate proteoglycan core protein;Endorepellin;LG3 peptide | <i>HSPG2</i>    | 3.9165  | 1.4272  | 0.4487  | -2.4893               | -3.4678               | 0.9785                | ↓                                   | 2.95E-07      |
| Heat shock protein 105 kDa                                                                    | <i>HSPH1</i>    | -2.6217 | 0.4290  | 0.7817  | 3.0507                | 3.4035                | -                     | -                                   | 1.14E-06      |
| Hypoxia up-regulated protein 1                                                                | <i>HYOU1</i>    | -1.1388 | 0.4269  | 0.3379  | 1.5657                | 1.4767                | -                     | -                                   | 6.12E-05      |
| Isoleucine--tRNA ligase, mitochondrial                                                        | <i>IARS2</i>    | 0.0064  | 1.3575  | 2.4591  | 1.3510                | 2.4527                | -1.1017               | ↑                                   | 3.54E-06      |
| Isocitrate dehydrogenase [NADP] cytoplasmic                                                   | <i>IDH1</i>     | 1.9913  | 0.7601  | 0.9667  | -1.2312               | -1.0246               | -                     | -                                   | 1.29E-04      |
| Isocitrate dehydrogenase [NADP], mitochondrial                                                | <i>IDH2</i>     | 1.2559  | 2.6025  | 2.6553  | 1.3466                | 1.3994                | -                     | -                                   | 6.51E-07      |
| Isocitrate dehydrogenase [NAD] subunit alpha, mitochondrial                                   | <i>IDH3A</i>    | -0.2977 | -0.7088 | -0.1935 | -0.4111               | -                     | -0.5153               | -                                   | 1.96E-04      |
| Insulin-like growth factor-binding protein complex acid labile subunit                        | <i>IGFALS</i>   | -1.8546 | -3.4785 | -4.2654 | -1.6240               | -2.4109               | 0.7869                | ↓                                   | 5.87E-05      |
| Ig alpha-1 chain C region                                                                     | <i>IGHA1</i>    | 2.5991  | 1.2397  | 0.6340  | -1.3594               | -1.9652               | 0.6057                | ↓                                   | 5.87E-05      |
| Ig gamma-1 chain C region                                                                     | <i>IGHG1</i>    | 5.6635  | 5.1612  | 6.2770  | -0.5024               | 0.6135                | -1.1159               | -                                   | 4.05E-04      |



| Protein Name                                                                                                                                         | Gene Symbol      | MNT LFQ | MPT LFQ | MLN LFQ | MPT x MNT fold change | MLN x MNT fold change | MPT x MLN fold change | Gradual ↑/↓ from MNT to MPT to MLN* | ANOVA p-value |
|------------------------------------------------------------------------------------------------------------------------------------------------------|------------------|---------|---------|---------|-----------------------|-----------------------|-----------------------|-------------------------------------|---------------|
| Ig gamma-4 chain C region                                                                                                                            | <i>IGHG4</i>     | 2.8549  | 1.3670  | 0.4826  | -1.4879               | -2.3723               | 0.8844                | ↓                                   | 1.11E-05      |
| Ig mu chain C region;Ig mu heavy chain disease protein                                                                                               | <i>IGHM</i>      | 4.2658  | 3.1237  | 3.1870  | -1.1422               | -1.0789               | -                     | -                                   | 9.03E-04      |
| Ig heavy chain V-III region JON;Ig heavy chain V-III region WEA;Ig heavy chain V-III region TRO                                                      | <i>IGHV3-21</i>  | 0.8715  | -1.1872 | 0.3057  | -2.0587               | -0.5658               | -1.4929               | -                                   | 9.84E-05      |
| Ig kappa chain C region                                                                                                                              | <i>IGKC</i>      | 4.8141  | 4.3470  | 4.9623  | -0.4671               | -                     | -0.6152               | -                                   | 7.28E-03      |
| Ig kappa chain V-III region B6                                                                                                                       | <i>IGKV3D-20</i> | 2.3964  | 0.8633  | 0.7732  | -1.5330               | -1.6231               | -                     | -                                   | 6.33E-05      |
| Interleukin enhancer-binding factor 2                                                                                                                | <i>ILF2</i>      | -0.0556 | 1.6223  | 1.7105  | 1.6779                | 1.7660                | -                     | -                                   | 6.24E-05      |
| Interleukin enhancer-binding factor 3                                                                                                                | <i>ILF3</i>      | -0.7598 | 0.8074  | 0.9704  | 1.5672                | 1.7302                | -                     | -                                   | 4.65E-05      |
| Integrin-linked protein kinase                                                                                                                       | <i>ILK</i>       | -0.5639 | -2.4023 | -3.1419 | -1.8384               | -2.5779               | 0.7396                | ↓                                   | 7.20E-06      |
| MICOS complex subunit MIC60                                                                                                                          | <i>IMMT</i>      | -0.0581 | 0.3886  | 0.7091  | 0.4467                | 0.7672                | -0.3205               | ↑                                   | 7.13E-04      |
| Inosine-5-monophosphate dehydrogenase 2                                                                                                              | <i>IMPDH2</i>    | -1.1121 | -0.1637 | -0.1140 | 0.9483                | 0.9980                | -                     | -                                   | 2.05E-02      |
| Ras GTPase-activating-like protein IQGAP1                                                                                                            | <i>IQGAP1</i>    | 1.9641  | 3.0197  | 3.2529  | 1.0556                | 1.2888                | -0.2332               | ↑                                   | 2.93E-06      |
| Isochorismatase domain-containing protein 1                                                                                                          | <i>ISOC1</i>     | -0.7003 | -0.6207 | 0.0948  | -                     | 0.7952                | -0.7155               | -                                   | 2.08E-05      |
| Isochorismatase domain-containing protein 2, mitochondrial                                                                                           | <i>ISOC2</i>     | -2.2670 | -1.4647 | -0.7093 | 0.8023                | 1.5577                | -0.7554               | ↑                                   | 6.82E-05      |
| Inositol-3-phosphate synthase 1                                                                                                                      | <i>ISYNA1</i>    | -2.5369 | -3.1870 | -2.6866 | -0.6501               | -                     | -0.5004               | -                                   | 1.01E-02      |
| Integrin beta-1                                                                                                                                      | <i>ITGB1</i>     | 1.1347  | -0.1164 | -0.1361 | -1.2510               | -1.2708               | -                     | -                                   | 5.64E-05      |
| Inter-alpha-trypsin inhibitor heavy chain H1                                                                                                         | <i>ITIHI</i>     | 1.4989  | 0.8098  | 1.1604  | -0.6891               | -0.3384               | -0.3507               | -                                   | 4.20E-03      |
| Inter-alpha-trypsin inhibitor heavy chain H2                                                                                                         | <i>ITIHI2</i>    | 2.4268  | 1.3975  | 0.9912  | -1.0293               | -1.4356               | 0.4063                | ↓                                   | 2.28E-07      |
| Inter-alpha-trypsin inhibitor heavy chain H4;70 kDa inter-alpha-trypsin inhibitor heavy chain H4;35 kDa inter-alpha-trypsin inhibitor heavy chain H4 | <i>ITIHI4</i>    | 2.3430  | 0.7080  | -0.1934 | -1.6350               | -2.5364               | 0.9014                | ↓                                   | 7.94E-07      |
| Junction plakoglobin                                                                                                                                 | <i>JUP</i>       | -0.3568 | -0.2977 | 0.0693  | -                     | 0.4261                | -0.3670               | -                                   | 1.31E-02      |
| BTB/POZ domain-containing protein KCTD12                                                                                                             | <i>KCTD12</i>    | 0.3887  | -0.1068 | -0.6159 | -0.4955               | -1.0046               | 0.5091                | ↓                                   | 6.69E-04      |
| KH domain-containing, RNA-binding, signal transduction-associated protein 1                                                                          | <i>KHDRBS1</i>   | -2.9218 | -1.3215 | -0.9233 | 1.6003                | 1.9986                | -                     | -                                   | 1.64E-03      |

| Protein Name                                                                                                                                                                                           | Gene Symbol     | MNT LFQ | MPT LFQ | MLN LFQ | MPT x MNT fold change | MLN x MNT fold change | MPT x MLN fold change | Gradual ↑/↓ from MNT to MPT to MLN* | ANOVA p-value |
|--------------------------------------------------------------------------------------------------------------------------------------------------------------------------------------------------------|-----------------|---------|---------|---------|-----------------------|-----------------------|-----------------------|-------------------------------------|---------------|
| Kininogen-1;Kininogen-1 heavy chain;T-kinin;Bradykinin;Lysyl-bradykinin;Kininogen-1 light chain;Low molecular weight growth-promoting factor                                                           | <i>KNG1</i>     | 2.2146  | 0.5840  | -0.3921 | -1.6305               | -2.6067               | 0.9762                | ↓                                   | 2.87E-07      |
| Keratin, type I cytoskeletal 18                                                                                                                                                                        | <i>KRT18</i>    | -1.9253 | 2.4561  | 2.8070  | 4.3813                | 4.7323                | -                     | -                                   | 7.92E-06      |
| Kinectin                                                                                                                                                                                               | <i>KTNI</i>     | -1.8219 | -0.1174 | -0.4225 | 1.7045                | 1.3995                | -                     | -                                   | 1.84E-05      |
| Laminin subunit gamma-1                                                                                                                                                                                | <i>LAMC1</i>    | 2.8354  | -0.4616 | -1.9305 | -3.2971               | -4.7659               | 1.4688                | ↓                                   | 8.64E-06      |
| Lysosome-associated membrane glycoprotein 1                                                                                                                                                            | <i>LAMP1</i>    | -1.0037 | -1.9356 | -2.2932 | -0.9320               | -1.2896               | -                     | -                                   | 8.70E-03      |
| Cytosol aminopeptidase                                                                                                                                                                                 | <i>LAP3</i>     | 1.0698  | 2.4773  | 3.1976  | 1.4075                | 2.1277                | -0.7203               | ↑                                   | 4.18E-07      |
| LIM and SH3 domain protein 1                                                                                                                                                                           | <i>LASP1</i>    | -0.3030 | -0.6597 | -0.0008 | -0.3566               | -                     | -0.6589               | -                                   | 9.12E-03      |
| Lipopolysaccharide-binding protein                                                                                                                                                                     | <i>LBP</i>      | -2.1570 | -3.8189 | -4.1528 | -1.6619               | -1.9958               | -                     | -                                   | 1.28E-04      |
| Plastin-2                                                                                                                                                                                              | <i>LCPI</i>     | 1.5234  | 2.4689  | 3.4928  | 0.9455                | 1.9694                | -1.0239               | ↑                                   | 3.68E-07      |
| L-lactate dehydrogenase A chain                                                                                                                                                                        | <i>LDHA</i>     | 2.7045  | 3.9121  | 3.8878  | 1.2076                | 1.1833                | -                     | -                                   | 3.42E-04      |
| L-lactate dehydrogenase B chain;L-lactate dehydrogenase                                                                                                                                                | <i>LDHB</i>     | 3.1512  | 1.6243  | 2.0426  | -1.5269               | -1.1086               | -0.4183               | -                                   | 7.66E-05      |
| LETM1 and EF-hand domain-containing protein 1, mitochondrial                                                                                                                                           | <i>LETM1</i>    | -0.5160 | 0.0940  | 0.7513  | 0.6100                | 1.2673                | -0.6573               | ↑                                   | 1.94E-04      |
| Galectin-3;Galectin                                                                                                                                                                                    | <i>LGALS3</i>   | 2.3268  | 2.3016  | 1.6557  | -                     | -0.6711               | 0.6459                | -                                   | 7.75E-03      |
| Galectin-3-binding protein                                                                                                                                                                             | <i>LGALS3BP</i> | 0.2368  | 1.1088  | 1.8695  | 0.8720                | 1.6327                | -0.7607               | ↑                                   | 4.03E-06      |
| Vesicular integral-membrane protein VIP36                                                                                                                                                              | <i>LMAN2</i>    | -2.4150 | -0.7556 | -0.7202 | 1.6593                | 1.6948                | -                     | -                                   | 4.38E-04      |
| Prelamin-A/C;Lamin-A/C                                                                                                                                                                                 | <i>LMNA</i>     | 4.2983  | 4.9327  | 4.5904  | 0.6344                | -                     | 0.3423                | -                                   | 8.07E-03      |
| Lamin-B1                                                                                                                                                                                               | <i>LMNB1</i>    | -1.0286 | 0.7844  | 0.9896  | 1.8130                | 2.0181                | -                     | -                                   | 6.51E-05      |
| Lon protease homolog, mitochondrial                                                                                                                                                                    | <i>LONP1</i>    | -0.8163 | -0.4685 | -0.0325 | 0.3479                | 0.7838                | -0.4360               | ↑                                   | 3.57E-03      |
| Leucine-rich alpha-2-glycoprotein                                                                                                                                                                      | <i>LRG1</i>     | -0.4564 | -2.7778 | -3.7323 | -2.3214               | -3.2759               | -                     | -                                   | 4.42E-04      |
| Prolow-density lipoprotein receptor-related protein 1;Low-density lipoprotein receptor-related protein 1 85 kDa subunit;Low-density lipoprotein receptor-related protein 1 515 kDa subunit;Low-density | <i>LRP1</i>     | -0.9453 | -2.5693 | -3.5181 | -1.6239               | -2.5728               | 0.9488                | ↓                                   | 6.13E-05      |

| Protein Name                                                                                | Gene Symbol   | MNT LFQ | MPT LFQ | MLN LFQ | MPT x MNT fold change | MLN x MNT fold change | MPT x MLN fold change | Gradual ↑/↓ from MNT to MPT to MLN* | ANOVA p-value |
|---------------------------------------------------------------------------------------------|---------------|---------|---------|---------|-----------------------|-----------------------|-----------------------|-------------------------------------|---------------|
| lipoprotein receptor-related protein 1 intracellular domain                                 |               |         |         |         |                       |                       |                       |                                     |               |
| Leucine-rich PPR motif-containing protein, mitochondrial                                    | <i>LRPPRC</i> | 0.3761  | 1.8887  | 2.5998  | 1.5126                | 2.2237                | -0.7111               | ↑                                   | 1.87E-10      |
| Leucine-rich repeat-containing protein 47                                                   | <i>LRRC47</i> | -1.9064 | -0.5811 | -0.7690 | 1.3254                | 1.1374                | -                     | -                                   | 3.48E-05      |
| Leucine-rich repeat-containing protein 59                                                   | <i>LRRC59</i> | -1.9319 | 1.2951  | 1.4037  | 3.2270                | 3.3356                | -                     | -                                   | 6.57E-08      |
| Leukotriene A-4 hydrolase                                                                   | <i>LTA4H</i>  | -0.3753 | -0.9391 | -0.2452 | -0.5637               | -                     | -0.6939               | -                                   | 3.87E-03      |
| Lactotransferrin;Lactoferricin-H;Kaliocin-1;Lactoferroxin-A;Lactoferroxin-B;Lactoferroxin-C | <i>LTF</i>    | 2.3578  | -3.6759 | -5.4587 | -6.0336               | -7.8165               | 1.7829                | ↓                                   | 3.20E-07      |
| Lumican                                                                                     | <i>LUM</i>    | 5.2356  | 4.7627  | 4.3527  | -0.4729               | -0.8829               | 0.4100                | ↓                                   | 1.58E-03      |
| Amine oxidase [flavin-containing] A                                                         | <i>MAOA</i>   | 1.9006  | -3.1677 | -3.0711 | -5.0683               | -4.9717               | -                     | -                                   | 1.85E-07      |
| Amine oxidase [flavin-containing] B                                                         | <i>MAOB</i>   | 0.1244  | -0.0923 | -0.6201 | -                     | -0.7445               | 0.5278                | -                                   | 6.88E-03      |
| Microtubule-associated protein;Microtubule-associated protein 4                             | <i>MAP4</i>   | 0.4738  | 0.0809  | -0.3864 | -0.3929               | -0.8603               | 0.4673                | ↓                                   | 3.12E-04      |
| S-adenosylmethionine synthase isoform type-2                                                | <i>MAT2A</i>  | -2.3362 | -1.0381 | -0.5495 | 1.2981                | 1.7867                | -                     | -                                   | 2.43E-03      |
| Matrin-3                                                                                    | <i>MATR3</i>  | -0.4992 | 0.8778  | 0.9482  | 1.3770                | 1.4475                | -                     | -                                   | 1.72E-05      |
| Cell surface glycoprotein MUC18                                                             | <i>MCAM</i>   | 1.8194  | -3.9521 | -4.5274 | -5.7715               | -6.3468               | -                     | -                                   | 3.32E-06      |
| Methylcrotonoyl-CoA carboxylase beta chain, mitochondrial                                   | <i>MCCC2</i>  | -1.4150 | 0.4662  | -1.1181 | 1.8812                | -                     | 1.5843                | -                                   | 2.71E-05      |
| Malate dehydrogenase, cytoplasmic                                                           | <i>MDH1</i>   | 2.2140  | 1.1024  | 1.3877  | -1.1116               | -0.8263               | -                     | -                                   | 6.11E-04      |
| Malate dehydrogenase, mitochondrial;Malate dehydrogenase                                    | <i>MDH2</i>   | 2.1562  | 3.7563  | 3.7478  | 1.6001                | 1.5916                | -                     | -                                   | 5.20E-06      |
| NADP-dependent malic enzyme                                                                 | <i>ME1</i>    | -0.2062 | -1.7249 | -1.9242 | -1.5187               | -1.7180               | -                     | -                                   | 1.01E-05      |
| Microsomal glutathione S-transferase 1                                                      | <i>MGST1</i>  | 0.7474  | -0.1052 | -0.4015 | -0.8527               | -1.1489               | -                     | -                                   | 1.18E-03      |
| 3-mercaptopyruvate sulfurtransferase;Sulfurtransferase                                      | <i>MPST</i>   | -1.3833 | -2.7148 | -2.1401 | -1.3315               | -0.7567               | -0.5747               | -                                   | 1.12E-03      |
| Moesin                                                                                      | <i>MSN</i>    | 2.1149  | 2.3546  | 2.7754  | -                     | 0.6605                | -0.4208               | -                                   | 2.75E-03      |
| C-1-tetrahydrofolate synthase,                                                              | <i>MTHFD1</i> | 1.2189  | -0.5599 | -0.1058 | -1.7789               | -1.3247               | -0.4542               | -                                   | 4.45E-06      |

| Protein Name                                                                                                                                                                                     | Gene Symbol   | MNT LFQ | MPT LFQ | MLN LFQ | MPT x MNT fold change | MLN x MNT fold change | MPT x MLN fold change | Gradual ↑/↓ from MNT to MPT to MLN* | ANOVA p-value |
|--------------------------------------------------------------------------------------------------------------------------------------------------------------------------------------------------|---------------|---------|---------|---------|-----------------------|-----------------------|-----------------------|-------------------------------------|---------------|
| cytoplasmic;Methylenetetrahydrofolate dehydrogenase;Methenyltetrahydrofolate cyclohydrolase;Formyltetrahydrofolate synthetase;C-1-tetrahydrofolate synthase, cytoplasmic, N-terminally processed |               |         |         |         |                       |                       |                       |                                     |               |
| Major vault protein                                                                                                                                                                              | <i>MVP</i>    | 0.3443  | 1.5622  | 0.8501  | 1.2180                | 0.5059                | 0.7121                | -                                   | 4.88E-05      |
| Myosin-10                                                                                                                                                                                        | <i>MYH10</i>  | -0.0072 | -0.3958 | -1.3524 | -0.3886               | -1.3452               | 0.9566                | ↓                                   | 2.87E-04      |
| Myosin-11                                                                                                                                                                                        | <i>MYH11</i>  | 3.4640  | 1.9041  | -0.0918 | -1.5598               | -3.5558               | 1.9960                | ↓                                   | 1.29E-07      |
| Myosin-14                                                                                                                                                                                        | <i>MYH14</i>  | 0.7663  | 0.5339  | 0.0531  | -                     | -0.7132               | 0.4808                | -                                   | 9.81E-04      |
| Myosin-9                                                                                                                                                                                         | <i>MYH9</i>   | 3.9996  | 5.8962  | 5.5984  | 1.8966                | 1.5987                | 0.2979                | -                                   | 4.16E-07      |
| Myosin light polypeptide 6                                                                                                                                                                       | <i>MYL6</i>   | 1.3919  | 2.5484  | 2.0698  | 1.1565                | 0.6779                | 0.4786                | -                                   | 4.73E-06      |
| Myosin regulatory light polypeptide 9                                                                                                                                                            | <i>MYL9</i>   | 0.0794  | -0.8459 | -1.7678 | -0.9253               | -1.8472               | 0.9219                | ↓                                   | 1.10E-05      |
| Unconventional myosin-Ic                                                                                                                                                                         | <i>MYO1C</i>  | 3.3706  | 1.2130  | 0.8485  | -2.1576               | -2.5221               | 0.3645                | ↓                                   | 3.90E-08      |
| Myoferlin                                                                                                                                                                                        | <i>MYOF</i>   | -0.2647 | 0.4892  | -0.4907 | -                     | -                     | 0.9800                | -                                   | 4.85E-02      |
| Nascent polypeptide-associated complex subunit alpha, muscle-specific form;Nascent polypeptide-associated complex subunit alpha                                                                  | <i>NACA</i>   | -0.6333 | 0.1846  | 0.7265  | 0.8179                | 1.3598                | -0.5420               | ↑                                   | 1.26E-03      |
| N-acetyl-D-glucosamine kinase                                                                                                                                                                    | <i>NAGK</i>   | -0.1834 | 0.7791  | 0.8594  | 0.9626                | 1.0429                | -                     | -                                   | 5.58E-05      |
| Nicotinamide phosphoribosyltransferase                                                                                                                                                           | <i>NAMPT</i>  | -0.6949 | -0.1270 | -0.5113 | 0.5679                | -                     | 0.3843                | -                                   | 1.90E-02      |
| Sialic acid synthase                                                                                                                                                                             | <i>NANS</i>   | -0.9799 | -0.3410 | 0.0876  | 0.6388                | 1.0675                | -                     | -                                   | 5.73E-03      |
| Nucleosome assembly protein 1-like 1                                                                                                                                                             | <i>NAP1L1</i> | -0.3429 | 0.3844  | 1.1645  | 0.7273                | 1.5074                | -0.7801               | ↑                                   | 5.96E-06      |
| Alpha-soluble NSF attachment protein                                                                                                                                                             | <i>NAPA</i>   | -0.1341 | 0.3323  | 0.4367  | 0.4665                | 0.5708                | -                     | -                                   | 1.16E-02      |
| Nucleolin                                                                                                                                                                                        | <i>NCL</i>    | 1.4315  | 2.8661  | 3.4304  | 1.4347                | 1.9989                | -0.5643               | ↑                                   | 2.22E-07      |
| NADH dehydrogenase [ubiquinone] 1 alpha subcomplex subunit 9, mitochondrial                                                                                                                      | <i>NDUFA9</i> | -1.8507 | -1.6506 | -1.1087 | -                     | 0.7420                | -0.5420               | -                                   | 4.93E-03      |
| NADH dehydrogenase [ubiquinone] iron-sulfur protein 3, mitochondrial                                                                                                                             | <i>NDUFS3</i> | -0.7285 | -0.7118 | -0.3504 | -                     | 0.3781                | -0.3614               | -                                   | 2.98E-02      |
| NADH dehydrogenase [ubiquinone] flavoprotein 1,                                                                                                                                                  | <i>NDUFV1</i> | -2.8738 | -3.6080 | -2.7650 | -0.7342               | -                     | -0.8430               | -                                   | 6.63E-03      |

| Protein Name                                                  | Gene Symbol      | MNT LFQ | MPT LFQ | MLN LFQ | MPT x MNT fold change | MLN x MNT fold change | MPT x MLN fold change | Gradual ↑/↓ from MNT to MPT to MLN* | ANOVA p-value |
|---------------------------------------------------------------|------------------|---------|---------|---------|-----------------------|-----------------------|-----------------------|-------------------------------------|---------------|
| mitochondrial                                                 |                  |         |         |         |                       |                       |                       |                                     |               |
| NADH dehydrogenase [ubiquinone] flavoprotein 2, mitochondrial | <i>NDUFV2</i>    | -2.7667 | -2.3475 | -1.7917 | 0.4193                | 0.9750                | -0.5557               | ↑                                   | 7.60E-04      |
| Nidogen-2                                                     | <i>NID2</i>      | 2.3346  | -1.9316 | -2.7235 | -4.2663               | -5.0581               | 0.7919                | ↓                                   | 1.17E-06      |
| Protein NipSnap homolog 3A                                    | <i>NIPSNAP3A</i> | -1.8081 | -2.7980 | -1.4706 | -0.9899               | -                     | -1.3275               | -                                   | 1.24E-03      |
| Nicotinamide N-methyltransferase                              | <i>NNMT</i>      | -2.0795 | 0.0543  | -1.6304 | 2.1338                | -                     | 1.6847                | -                                   | 1.50E-04      |
| NAD(P) transhydrogenase, mitochondrial                        | <i>NNT</i>       | -0.1145 | -1.8029 | -1.0699 | -1.6884               | -0.9553               | -0.7331               | -                                   | 4.51E-04      |
| Non-POU domain-containing octamer-binding protein             | <i>NONO</i>      | -1.3830 | 0.3358  | 0.3498  | 1.7188                | 1.7328                | -                     | -                                   | 8.54E-06      |
| Puromycin-sensitive aminopeptidase                            | <i>NPEPPS</i>    | 1.1588  | 1.4298  | 1.6270  | -                     | 0.4682                | -                     | -                                   | 1.97E-02      |
| Nucleophosmin                                                 | <i>NPM1</i>      | -1.1842 | 1.0085  | 1.3060  | 2.1928                | 2.4902                | -                     | -                                   | 4.53E-06      |
| Vesicle-fusing ATPase                                         | <i>NSF</i>       | -0.9276 | 0.7123  | 0.5402  | 1.6399                | 1.4678                | -                     | -                                   | 1.11E-04      |
| Nuclear mitotic apparatus protein 1                           | <i>NUMA1</i>     | -1.4829 | 0.1777  | 0.5041  | 1.6606                | 1.9870                | -0.3264               | ↑                                   | 5.85E-06      |
| 2-oxoglutarate dehydrogenase, mitochondrial                   | <i>OGDH</i>      | -0.1554 | -1.5441 | -1.3807 | -1.3886               | -1.2253               | -                     | -                                   | 2.37E-03      |
| Mimecan                                                       | <i>OGN</i>       | 5.0148  | 2.9127  | 0.7526  | -2.1022               | -4.2622               | 2.1600                | ↓                                   | 1.43E-06      |
| Alpha-1-acid glycoprotein 1                                   | <i>ORM1</i>      | 3.2234  | 1.1875  | 0.8735  | -2.0358               | -2.3498               | -                     | -                                   | 1.46E-04      |
| Ubiquitin thioesterase OTUB1                                  | <i>OTUB1</i>     | -0.2658 | 1.1947  | 1.1275  | 1.4605                | 1.3933                | -                     | -                                   | 1.66E-05      |
| Protein disulfide-isomerase                                   | <i>P4HB</i>      | 2.3651  | 4.0196  | 4.0523  | 1.6545                | 1.6872                | -                     | -                                   | 1.59E-06      |
| Proliferation-associated protein 2G4                          | <i>PA2G4</i>     | -0.8532 | -0.4701 | -0.7008 | 0.3831                | -                     | -                     | -                                   | 2.35E-02      |
| Palladin                                                      | <i>PALLD</i>     | -1.1851 | 0.2897  | -0.0821 | 1.4748                | 1.1030                | 0.3718                | -                                   | 8.00E-06      |
| Poly [ADP-ribose] polymerase 1                                | <i>PARP1</i>     | -0.3357 | 2.1042  | 2.6797  | 2.4399                | 3.0154                | -0.5755               | ↑                                   | 6.65E-06      |
| Alpha-parvin                                                  | <i>PARVA</i>     | 0.8488  | -1.3354 | -1.7643 | -2.1842               | -2.6131               | 0.4289                | ↓                                   | 9.40E-07      |
| Poly(rC)-binding protein 1                                    | <i>PCBP1</i>     | -0.6968 | 0.8153  | 0.9208  | 1.5121                | 1.6176                | -                     | -                                   | 2.25E-06      |
| Phosphoenolpyruvate carboxykinase [GTP], mitochondrial        | <i>PCK2</i>      | -1.6544 | -1.6547 | -0.9009 | -                     | 0.7535                | -0.7539               | -                                   | 9.99E-03      |
| Preylcysteine oxidase 1                                       | <i>PCYOX1</i>    | 1.7375  | 0.1072  | -0.6672 | -1.6304               | -2.4047               | 0.7743                | ↓                                   | 7.10E-07      |

| Protein Name                                                                                | Gene Symbol    | MNT LFQ | MPT LFQ | MLN LFQ | MPT x MNT fold change | MLN x MNT fold change | MPT x MLN fold change | Gradual ↑/↓ from MNT to MPT to MLN* | ANOVA p-value |
|---------------------------------------------------------------------------------------------|----------------|---------|---------|---------|-----------------------|-----------------------|-----------------------|-------------------------------------|---------------|
| Programmed cell death 6-interacting protein                                                 | <i>PDCD6IP</i> | 0.7629  | 1.5288  | 1.6945  | 0.7659                | 0.9316                | -                     | -                                   | 5.28E-04      |
| Pyruvate dehydrogenase E1 component subunit alpha, somatic form, mitochondrial              | <i>PDHA1</i>   | -0.2887 | -2.3811 | -2.1680 | -2.0924               | -1.8793               | -                     | -                                   | 9.57E-06      |
| Protein disulfide-isomerase A3                                                              | <i>PDIA3</i>   | 2.2440  | 4.0449  | 3.6608  | 1.8008                | 1.4168                | 0.3840                | -                                   | 5.01E-06      |
| Protein disulfide-isomerase A4                                                              | <i>PDIA4</i>   | 0.4771  | 1.5657  | 2.1348  | 1.0886                | 1.6577                | -0.5691               | ↑                                   | 8.53E-06      |
| Protein disulfide-isomerase A6                                                              | <i>PDIA6</i>   | 0.8222  | 1.9123  | 2.6144  | 1.0900                | 1.7922                | -0.7022               | ↑                                   | 4.62E-07      |
| Pyridoxal kinase                                                                            | <i>PDXK</i>    | -0.1047 | -1.5881 | -1.4210 | -1.4835               | -1.3163               | -                     | -                                   | 2.39E-04      |
| Astrocytic phosphoprotein PEA-15                                                            | <i>PEA15</i>   | -2.3105 | -1.9560 | -1.7003 | -                     | 0.6102                | -                     | -                                   | 2.28E-02      |
| Phosphatidylethanolamine-binding protein 1;Hippocampal cholinergic neurostimulating peptide | <i>PEBP1</i>   | 1.9676  | 2.0091  | 3.7814  | -                     | 1.8138                | -1.7723               | -                                   | 1.79E-05      |
| ATP-dependent 6-phosphofructokinase, liver type                                             | <i>PFKL</i>    | 0.4891  | -0.4364 | 0.1754  | -0.9255               | -0.3138               | -0.6118               | -                                   | 2.10E-04      |
| Profilin-1                                                                                  | <i>PFN1</i>    | 1.4136  | 2.0501  | 1.9851  | 0.6366                | 0.5715                | -                     | -                                   | 1.69E-05      |
| 6-phosphogluconate dehydrogenase, decarboxylating                                           | <i>PGD</i>     | 2.2959  | 1.4374  | 1.3215  | -0.8584               | -0.9744               | -                     | -                                   | 1.15E-04      |
| Phosphoglycerate kinase 1                                                                   | <i>PGK1</i>    | 2.8898  | 4.2675  | 4.7255  | 1.3778                | 1.8358                | -0.4580               | ↑                                   | 9.44E-07      |
| 6-phosphogluconolactonase                                                                   | <i>PGLS</i>    | -0.0951 | 0.0623  | 0.3496  | -                     | 0.4447                | -0.2872               | -                                   | 1.52E-03      |
| Phosphoglucomutase-1                                                                        | <i>PGM1</i>    | 1.7556  | 0.1862  | 0.0038  | -1.5695               | -1.7518               | -                     | -                                   | 7.01E-05      |
| Phosphoglucomutase-2                                                                        | <i>PGM2</i>    | -1.3467 | -0.3734 | -0.6170 | 0.9733                | 0.7297                | -                     | -                                   | 7.51E-03      |
| Membrane-associated progesterone receptor component 1                                       | <i>PGRMC1</i>  | -0.9258 | -1.6026 | -1.6372 | -0.6768               | -0.7114               | -                     | -                                   | 1.39E-03      |
| Membrane-associated progesterone receptor component 2                                       | <i>PGRMC2</i>  | 0.0923  | -0.8411 | -0.6815 | -0.9334               | -0.7738               | -                     | -                                   | 4.41E-04      |
| Prohibitin                                                                                  | <i>PHB</i>     | 1.2827  | 2.8465  | 3.0430  | 1.5638                | 1.7603                | -                     | -                                   | 9.47E-07      |
| Prohibitin-2                                                                                | <i>PHB2</i>    | 1.1992  | 2.5578  | 3.1636  | 1.3587                | 1.9645                | -0.6058               | ↑                                   | 3.64E-06      |
| D-3-phosphoglycerate dehydrogenase                                                          | <i>PHGDH</i>   | 1.9678  | -0.8964 | -1.5676 | -2.8642               | -3.5354               | 0.6712                | ↓                                   | 7.46E-08      |
| Phosphatidylinositol-binding clathrin assembly protein                                      | <i>PICALM</i>  | -2.1119 | -1.9310 | -2.5316 | -                     | -                     | 0.6006                | -                                   | 3.80E-02      |

| Protein Name                                                                                                                            | Gene Symbol    | MNT LFQ | MPT LFQ | MLN LFQ | MPT x MNT fold change | MLN x MNT fold change | MPT x MLN fold change | Gradual ↑/↓ from MNT to MPT to MLN* | ANOVA p-value |
|-----------------------------------------------------------------------------------------------------------------------------------------|----------------|---------|---------|---------|-----------------------|-----------------------|-----------------------|-------------------------------------|---------------|
| Pyruvate kinase PKM;Pyruvate kinase                                                                                                     | <i>PKM</i>     | 2.9453  | 5.0940  | 4.9225  | 2.1487                | 1.9772                | -                     | -                                   | 1.63E-07      |
| Plectin                                                                                                                                 | <i>PLEC</i>    | 2.9829  | 4.0274  | 4.2546  | 1.0446                | 1.2717                | -0.2272               | ↑                                   | 1.04E-06      |
| Plasminogen;Plasmin heavy chain A;Activation peptide;Angiostatin;Plasmin heavy chain A, short form;Plasmin light chain B                | <i>PLG</i>     | 1.9108  | -0.4885 | -1.9213 | -2.3993               | -3.8321               | 1.4328                | ↓                                   | 3.06E-05      |
| Perilipin-1                                                                                                                             | <i>PLIN1</i>   | 4.4659  | -2.8982 | -2.4433 | -7.3640               | -6.9091               | -0.4549               | -                                   | 1.49E-10      |
| Perilipin-3                                                                                                                             | <i>PLIN3</i>   | -1.5425 | -0.8102 | -0.3030 | 0.7323                | 1.2395                | -                     | -                                   | 5.61E-03      |
| Perilipin-4                                                                                                                             | <i>PLIN4</i>   | 3.6374  | -5.2592 | -5.7818 | -8.8965               | -9.4192               | -                     | -                                   | 1.50E-07      |
| Plastin-3                                                                                                                               | <i>PLS3</i>    | 0.7458  | 1.1855  | 0.5458  | -                     | -                     | 0.6397                | -                                   | 3.26E-02      |
| Purine nucleoside phosphorylase                                                                                                         | <i>PNP</i>     | 1.3906  | 1.7133  | 3.3444  | 0.3226                | 1.9537                | -1.6311               | ↑                                   | 1.07E-07      |
| Serum paraoxonase/arylesterase 1                                                                                                        | <i>PON1</i>    | 0.6889  | -1.6059 | -3.2990 | -2.2948               | -3.9879               | 1.6931                | ↓                                   | 1.87E-07      |
| Periostin                                                                                                                               | <i>POSTN</i>   | 2.6870  | 6.3962  | 6.6599  | 3.7092                | 3.9729                | -0.2638               | ↑                                   | 1.29E-08      |
| Inorganic pyrophosphatase                                                                                                               | <i>PPA1</i>    | -0.2710 | 0.1028  | 0.4841  | -                     | 0.7551                | -                     | -                                   | 3.69E-02      |
| Inorganic pyrophosphatase 2, mitochondrial                                                                                              | <i>PPA2</i>    | -1.8031 | -0.7757 | -0.5804 | 1.0274                | 1.2227                | -                     | -                                   | 3.52E-04      |
| Peptidyl-prolyl cis-trans isomerase A;Peptidyl-prolyl cis-trans isomerase A, N-terminally processed;Peptidyl-prolyl cis-trans isomerase | <i>PPIA</i>    | 2.9611  | 4.3352  | 4.5304  | 1.3741                | 1.5693                | -                     | -                                   | 3.18E-05      |
| Peptidyl-prolyl cis-trans isomerase B                                                                                                   | <i>PPIB</i>    | 1.7647  | 2.5656  | 2.6666  | 0.8009                | 0.9019                | -                     | -                                   | 3.92E-05      |
| Serine/threonine-protein phosphatase 2A 65 kDa regulatory subunit A alpha isoform                                                       | <i>PPP2R1A</i> | 0.4357  | 0.7772  | 1.1253  | 0.3416                | 0.6896                | -0.3480               | ↑                                   | 2.49E-03      |
| Peroxiredoxin-1                                                                                                                         | <i>PRDX1</i>   | 2.6855  | 4.1870  | 4.4239  | 1.5015                | 1.7384                | -0.2369               | ↑                                   | 9.18E-07      |
| Peroxiredoxin-2                                                                                                                         | <i>PRDX2</i>   | 3.9749  | 2.1224  | 2.2232  | -1.8525               | -1.7518               | -                     | -                                   | 3.80E-06      |
| Thioredoxin-dependent peroxide reductase, mitochondrial                                                                                 | <i>PRDX3</i>   | 1.2959  | 1.4397  | 1.9210  | -                     | 0.6250                | -0.4813               | -                                   | 3.09E-04      |
| Peroxiredoxin-4                                                                                                                         | <i>PRDX4</i>   | -0.5981 | 0.2999  | 1.5357  | 0.8979                | 2.1338                | -1.2358               | ↑                                   | 1.22E-05      |
| Peroxiredoxin-5, mitochondrial                                                                                                          | <i>PRDX5</i>   | 0.2603  | 0.7309  | 0.9129  | 0.4706                | 0.6526                | -                     | -                                   | 1.79E-03      |
| Peroxiredoxin-6                                                                                                                         | <i>PRDX6</i>   | 3.4991  | 3.4340  | 4.1766  | -                     | 0.6775                | -0.7426               | -                                   | 2.16E-04      |

| Protein Name                                                   | Gene Symbol    | MNT LFQ | MPT LFQ | MLN LFQ | MPT x MNT fold change | MLN x MNT fold change | MPT x MLN fold change | Gradual ↑/↓ from MNT to MPT to MLN* | ANOVA p-value |
|----------------------------------------------------------------|----------------|---------|---------|---------|-----------------------|-----------------------|-----------------------|-------------------------------------|---------------|
| Prolargin                                                      | <i>PRELP</i>   | 4.8785  | 3.2139  | 3.8117  | -1.6646               | -1.0668               | -0.5978               | -                                   | 1.15E-05      |
| Prolyl endopeptidase                                           | <i>PREP</i>    | -1.0630 | -0.7195 | -0.2312 | 0.3435                | 0.8318                | -0.4883               | ↑                                   | 2.92E-04      |
| cAMP-dependent protein kinase catalytic subunit beta           | <i>PRKACB</i>  | -1.0569 | -2.4392 | -1.7809 | -1.3823               | -0.7240               | -0.6583               | -                                   | 1.13E-03      |
| cAMP-dependent protein kinase type II-alpha regulatory subunit | <i>PRKAR2A</i> | 2.1199  | -0.1883 | -0.5626 | -2.3082               | -2.6825               | -                     | -                                   | 1.65E-02      |
| cAMP-dependent protein kinase type II-beta regulatory subunit  | <i>PRKAR2B</i> | 0.8785  | -1.4201 | -1.0323 | -2.2986               | -1.9108               | -0.3878               | -                                   | 9.31E-07      |
| Protein kinase C delta-binding protein                         | <i>PRKCDBP</i> | 0.4444  | -1.5609 | -2.9268 | -2.0053               | -3.3712               | -                     | -                                   | 8.29E-03      |
| DNA-dependent protein kinase catalytic subunit                 | <i>PRKDC</i>   | -0.1922 | 1.5011  | 1.9272  | 1.6933                | 2.1195                | -                     | -                                   | 1.03E-04      |
| Pre-mRNA-processing-splicing factor 8                          | <i>PRPF8</i>   | -1.8677 | -0.2932 | -0.2698 | 1.5745                | 1.5979                | -                     | -                                   | 3.78E-06      |
| Proteasome subunit alpha type-1;Proteasome subunit alpha type  | <i>PSMA1</i>   | 0.0977  | -0.2259 | 0.7835  | -0.3236               | 0.6857                | -1.0093               | -                                   | 7.11E-04      |
| Proteasome subunit alpha type;Proteasome subunit alpha type-2  | <i>PSMA2</i>   | -0.0398 | 0.2112  | 0.5527  | 0.2510                | 0.5925                | -0.3415               | ↑                                   | 2.13E-03      |
| Proteasome subunit alpha type-5                                | <i>PSMA5</i>   | -0.1181 | 0.3661  | 0.8105  | 0.4842                | 0.9286                | -0.4444               | ↑                                   | 5.26E-04      |
| Proteasome subunit alpha type-7                                | <i>PSMA7</i>   | 0.6822  | 1.0574  | 1.3662  | 0.3752                | 0.6840                | -0.3088               | ↑                                   | 2.57E-04      |
| Proteasome subunit beta type-1                                 | <i>PSMB1</i>   | 0.3038  | 0.6543  | 0.8283  | 0.3504                | 0.5245                | -                     | -                                   | 6.91E-03      |
| Proteasome subunit beta type-2                                 | <i>PSMB2</i>   | -1.2514 | -0.8324 | -0.5748 | 0.4190                | 0.6766                | -                     | -                                   | 5.92E-03      |
| Proteasome subunit beta type-5                                 | <i>PSMB5</i>   | -0.8838 | -1.4095 | -1.0725 | -0.5257               | -                     | -                     | -                                   | 3.24E-02      |
| Proteasome subunit beta type-6                                 | <i>PSMB6</i>   | -1.5317 | -2.1617 | -1.9023 | -0.6301               | -0.3706               | -0.2595               | -                                   | 1.13E-03      |
| 26S protease regulatory subunit 4                              | <i>PSMC1</i>   | -1.1746 | -0.0257 | -0.0102 | 1.1490                | 1.1644                | -                     | -                                   | 5.95E-04      |
| 26S protease regulatory subunit 7                              | <i>PSMC2</i>   | -1.7163 | -1.9651 | -1.4158 | -                     | -                     | -0.5493               | -                                   | 2.23E-02      |
| 26S protease regulatory subunit 6A                             | <i>PSMC3</i>   | -1.1227 | -1.3735 | -0.7350 | -                     | 0.3876                | -0.6385               | -                                   | 7.69E-03      |
| 26S protease regulatory subunit 8                              | <i>PSMC5</i>   | -1.0526 | -0.2663 | -0.1275 | 0.7863                | 0.9252                | -                     | -                                   | 2.32E-03      |
| 26S proteasome non-ATPase regulatory subunit 1                 | <i>PSMD1</i>   | -1.5322 | -0.8460 | -0.3631 | 0.6862                | 1.1691                | -0.4829               | ↑                                   | 2.43E-04      |
| 26S proteasome non-ATPase regulatory subunit 11                | <i>PSMD11</i>  | 0.1537  | 0.4238  | 0.6323  | -                     | 0.4787                | -                     | -                                   | 3.83E-02      |



| Protein Name                                                                                            | Gene Symbol   | MNT LFQ | MPT LFQ | MLN LFQ | MPT x MNT fold change | MLN x MNT fold change | MPT x MLN fold change | Gradual ↑/↓ from MNT to MPT to MLN* | ANOVA p-value |
|---------------------------------------------------------------------------------------------------------|---------------|---------|---------|---------|-----------------------|-----------------------|-----------------------|-------------------------------------|---------------|
| 26S proteasome non-ATPase regulatory subunit 3                                                          | <i>PSMD3</i>  | -1.3416 | -0.7808 | -0.1045 | 0.5608                | 1.2371                | -0.6763               | ↑                                   | 2.33E-03      |
| 26S proteasome non-ATPase regulatory subunit 5                                                          | <i>PSMD5</i>  | -1.0581 | -1.8220 | -1.8194 | -0.7639               | -0.7613               | -                     | -                                   | 5.43E-03      |
| 26S proteasome non-ATPase regulatory subunit 6                                                          | <i>PSMD6</i>  | -1.0103 | -0.7619 | -0.2766 | -                     | 0.7337                | -0.4853               | -                                   | 9.35E-03      |
| 26S proteasome non-ATPase regulatory subunit 7                                                          | <i>PSMD7</i>  | -2.2423 | -1.7413 | -1.2678 | 0.5010                | 0.9745                | -0.4735               | ↑                                   | 3.69E-03      |
| Proteasome activator complex subunit 1                                                                  | <i>PSME1</i>  | 0.4624  | 2.3759  | 2.9383  | 1.9134                | 2.4759                | -0.5624               | ↑                                   | 3.27E-07      |
| Proteasome activator complex subunit 2                                                                  | <i>PSME2</i>  | -0.9478 | 0.7647  | 1.1228  | 1.7125                | 2.0706                | -                     | -                                   | 4.25E-05      |
| Polypyrimidine tract-binding protein 1                                                                  | <i>PTBP1</i>  | -0.8922 | 1.3677  | 1.6058  | 2.2599                | 2.4980                | -0.2381               | ↑                                   | 2.40E-07      |
| Prostacyclin synthase                                                                                   | <i>PTGIS</i>  | -0.6168 | -4.2204 | -3.8418 | -3.6036               | -3.2250               | -0.3787               | -                                   | 1.48E-08      |
| Prostaglandin reductase 1                                                                               | <i>PTGR1</i>  | -2.2487 | -2.6385 | -3.1034 | -0.3898               | -0.8547               | 0.4649                | ↓                                   | 2.91E-03      |
| Tyrosine-protein phosphatase non-receptor type 6                                                        | <i>PTPN6</i>  | -3.6314 | -2.8912 | -1.7327 | -                     | 1.8986                | -1.1585               | -                                   | 5.07E-03      |
| Polymerase I and transcript release factor                                                              | <i>PTRF</i>   | 3.8445  | 0.8655  | 0.3079  | -2.9790               | -3.5366               | 0.5575                | ↓                                   | 2.45E-07      |
| Transcriptional activator protein Pur-alpha                                                             | <i>PURA</i>   | -1.6122 | -1.5098 | -1.8242 | -                     | -                     | 0.3144                | -                                   | 3.16E-02      |
| Glycogen phosphorylase, brain form                                                                      | <i>PYGB</i>   | 0.8348  | 0.2045  | 0.5159  | -0.6303               | -0.3189               | -0.3114               | -                                   | 9.54E-04      |
| Alpha-1,4 glucan phosphorylase;Glycogen phosphorylase, liver form                                       | <i>PYGL</i>   | 1.5454  | 0.0461  | 0.1640  | -1.4993               | -1.3814               | -                     | -                                   | 4.17E-06      |
| Dihydropteridine reductase                                                                              | <i>QDPR</i>   | 0.6220  | 0.7836  | 2.0623  | -                     | 1.4403                | -1.2787               | -                                   | 1.08E-05      |
| Ras-related protein Rab-10                                                                              | <i>RAB10</i>  | -1.5609 | -2.0300 | -2.4904 | -                     | -0.9295               | -                     | -                                   | 4.14E-02      |
| Ras-related protein Rab-5B                                                                              | <i>RAB5B</i>  | -2.0866 | -2.5703 | -2.5991 | -0.4837               | -0.5125               | -                     | -                                   | 1.06E-02      |
| Ras-related protein Rab-8A                                                                              | <i>RAB8A</i>  | -1.5988 | -2.4076 | -2.5517 | -0.8088               | -0.9529               | -                     | -                                   | 2.13E-02      |
| UV excision repair protein RAD23 homolog B                                                              | <i>RAD23B</i> | -2.2477 | -2.1681 | -1.3347 | -                     | 0.9130                | -0.8334               | -                                   | 4.34E-02      |
| GTP-binding nuclear protein Ran                                                                         | <i>RAN</i>    | 1.1497  | 0.9083  | 2.2785  | -                     | 1.1289                | -1.3702               | -                                   | 6.12E-05      |
| RNA-binding motif protein, X chromosome;RNA-binding motif protein, X chromosome, N-terminally processed | <i>RBMX</i>   | -1.5038 | 0.2185  | 0.1336  | 1.7223                | 1.6375                | -                     | -                                   | 1.68E-04      |
| Retinol-binding protein 4;Plasma retinol-binding protein(1-182);Plasma retinol-binding protein(1-       | <i>RBP4</i>   | -1.8033 | -4.7505 | -5.3913 | -2.9472               | -3.5880               | -                     | -                                   | 7.58E-04      |

| Protein Name                                                                     | Gene Symbol   | MNT LFQ | MPT LFQ | MLN LFQ | MPT x MNT fold change | MLN x MNT fold change | MPT x MLN fold change | Gradual ↑/↓ from MNT to MPT to MLN* | ANOVA p-value |
|----------------------------------------------------------------------------------|---------------|---------|---------|---------|-----------------------|-----------------------|-----------------------|-------------------------------------|---------------|
| 181);Plasma retinol-binding protein(1-179);Plasma retinol-binding protein(1-176) |               |         |         |         |                       |                       |                       |                                     |               |
| All-trans-retinol 13,14-reductase                                                | <i>RETSAT</i> | -0.0800 | -3.0121 | -3.2020 | -2.9321               | -3.1220               | -                     | -                                   | 1.44E-05      |
| Ribonuclease inhibitor                                                           | <i>RNHI</i>   | 0.8151  | 0.3684  | 0.1981  | -0.4467               | -0.6171               | -                     | -                                   | 2.36E-02      |
| Aminopeptidase B                                                                 | <i>RNPEP</i>  | -1.4811 | 0.5614  | 1.6734  | 2.0426                | 3.1546                | -1.1120               | ↑                                   | 3.98E-05      |
| 60S ribosomal protein L10a                                                       | <i>RPL10A</i> | -0.1413 | 1.0403  | 1.3574  | 1.1816                | 1.4986                | -                     | -                                   | 1.51E-03      |
| 60S ribosomal protein L12                                                        | <i>RPL12</i>  | -0.2235 | 0.6725  | 0.7481  | 0.8960                | 0.9716                | -                     | -                                   | 9.39E-04      |
| 60S ribosomal protein L13                                                        | <i>RPL13</i>  | -1.6845 | -0.0528 | 0.7723  | 1.6317                | 2.4568                | -0.8252               | ↑                                   | 2.54E-05      |
| 60S ribosomal protein L14                                                        | <i>RPL14</i>  | -0.8485 | 0.0820  | -0.3975 | 0.9305                | 0.4510                | 0.4795                | -                                   | 1.24E-03      |
| 60S ribosomal protein L17                                                        | <i>RPL17</i>  | -0.4982 | -0.1569 | 0.1941  | 0.3414                | 0.6924                | -0.3510               | ↑                                   | 5.53E-03      |
| 60S ribosomal protein L18                                                        | <i>RPL18</i>  | -1.7992 | 0.6932  | 1.0535  | 2.4924                | 2.8526                | -                     | -                                   | 5.01E-05      |
| 60S ribosomal protein L23a                                                       | <i>RPL23A</i> | -0.2900 | 0.6136  | 0.8757  | 0.9036                | 1.1657                | -                     | -                                   | 9.15E-04      |
| 60S ribosomal protein L24                                                        | <i>RPL24</i>  | -1.4902 | -0.6016 | -0.1776 | 0.8886                | 1.3126                | -                     | -                                   | 2.89E-03      |
| 60S ribosomal protein L27                                                        | <i>RPL27</i>  | -0.3873 | 0.5166  | 0.1802  | 0.9039                | 0.5675                | -                     | -                                   | 1.90E-03      |
| 60S ribosomal protein L3                                                         | <i>RPL3</i>   | -1.3728 | 0.5731  | -0.2382 | 1.9459                | 1.1345                | 0.8114                | -                                   | 2.98E-06      |
| 60S ribosomal protein L31                                                        | <i>RPL31</i>  | -1.1922 | -0.7363 | -1.4831 | -                     | -                     | 0.7468                | -                                   | 4.10E-02      |
| 60S ribosomal protein L4                                                         | <i>RPL4</i>   | -0.7083 | 1.9934  | 2.0225  | 2.7017                | 2.7308                | -                     | -                                   | 2.82E-07      |
| 60S ribosomal protein L5                                                         | <i>RPL5</i>   | -1.3192 | -0.6674 | 0.1091  | -                     | 1.4283                | -                     | -                                   | 1.22E-02      |
| 60S ribosomal protein L6                                                         | <i>RPL6</i>   | -2.1260 | 1.2614  | 0.6111  | 3.3874                | 2.7371                | 0.6503                | -                                   | 8.39E-06      |
| 60S ribosomal protein L7                                                         | <i>RPL7</i>   | 0.3712  | 1.0304  | 1.6836  | 0.6591                | 1.3124                | -0.6533               | ↑                                   | 2.98E-04      |
| 60S ribosomal protein L7a                                                        | <i>RPL7A</i>  | -0.7041 | 1.2934  | 0.8960  | 1.9975                | 1.6001                | -                     | -                                   | 2.36E-02      |
| 60S ribosomal protein L9                                                         | <i>RPL9</i>   | -0.5136 | 0.6038  | 0.6715  | 1.1174                | 1.1850                | -                     | -                                   | 6.94E-04      |
| 60S acidic ribosomal protein P0                                                  | <i>RPLP0</i>  | 0.0649  | 1.4098  | 1.5141  | 1.3448                | 1.4492                | -                     | -                                   | 2.86E-04      |
| 60S acidic ribosomal protein P2                                                  | <i>RPLP2</i>  | -2.5938 | -1.7711 | -0.7285 | -                     | 1.8652                | -                     | -                                   | 1.52E-02      |

| Protein Name                                                             | Gene Symbol   | MNT LFQ | MPT LFQ | MLN LFQ | MPT x MNT fold change | MLN x MNT fold change | MPT x MLN fold change | Gradual ↑/↓ from MNT to MPT to MLN* | ANOVA p-value |
|--------------------------------------------------------------------------|---------------|---------|---------|---------|-----------------------|-----------------------|-----------------------|-------------------------------------|---------------|
| Dolichyl-diphosphooligosaccharide--protein glycosyltransferase subunit 1 | <i>RPN1</i>   | 1.2776  | 2.1613  | 2.4283  | 0.8837                | 1.1507                | -0.2670               | ↑                                   | 3.96E-05      |
| Dolichyl-diphosphooligosaccharide--protein glycosyltransferase subunit 2 | <i>RPN2</i>   | 0.7111  | 1.6131  | 1.8250  | 0.9020                | 1.1139                | -0.2119               | ↑                                   | 1.33E-05      |
| 40S ribosomal protein S10                                                | <i>RPS10</i>  | -0.5231 | 0.5369  | 0.8020  | 1.0600                | 1.3251                | -                     | -                                   | 8.90E-05      |
| 40S ribosomal protein S13                                                | <i>RPS13</i>  | 0.0770  | 1.1678  | 0.8601  | 1.0907                | 0.7831                | -                     | -                                   | 5.94E-04      |
| 40S ribosomal protein S15a                                               | <i>RPS15A</i> | -0.5554 | 0.1531  | -0.4489 | 0.7086                | -                     | 0.6021                | -                                   | 1.25E-02      |
| 40S ribosomal protein S19                                                | <i>RPS19</i>  | -0.9133 | 0.3090  | 0.3130  | 1.2223                | 1.2263                | -                     | -                                   | 6.85E-03      |
| 40S ribosomal protein S2                                                 | <i>RPS2</i>   | 0.4333  | 1.2268  | 1.1907  | 0.7935                | 0.7574                | -                     | -                                   | 3.24E-03      |
| 40S ribosomal protein S20                                                | <i>RPS20</i>  | 0.1410  | 0.5603  | 0.6529  | 0.4194                | 0.5119                | -                     | -                                   | 2.03E-02      |
| 40S ribosomal protein S3                                                 | <i>RPS3</i>   | 1.0427  | 2.1523  | 2.5579  | 1.1096                | 1.5152                | -0.4056               | ↑                                   | 4.78E-05      |
| 40S ribosomal protein S3a                                                | <i>RPS3A</i>  | -1.5143 | -0.3145 | -0.4741 | 1.1999                | 1.0403                | -                     | -                                   | 1.60E-02      |
| 40S ribosomal protein S7                                                 | <i>RPS7</i>   | -1.6416 | -0.3973 | -0.5479 | 1.2443                | 1.0937                | -                     | -                                   | 1.38E-04      |
| 40S ribosomal protein S8                                                 | <i>RPS8</i>   | 0.0491  | 0.9384  | 0.8724  | 0.8894                | 0.8233                | -                     | -                                   | 1.17E-02      |
| 40S ribosomal protein S9                                                 | <i>RPS9</i>   | 0.1508  | 1.8094  | 1.9852  | 1.6586                | 1.8344                | -                     | -                                   | 5.55E-06      |
| 40S ribosomal protein SA                                                 | <i>RPSA</i>   | 0.9464  | 2.0585  | 2.4535  | 1.1121                | 1.5072                | -0.3950               | ↑                                   | 2.54E-05      |
| Ribosome-binding protein 1                                               | <i>RRBP1</i>  | -1.5699 | 0.3034  | 1.2376  | 1.8733                | 2.8075                | -0.9342               | ↑                                   | 1.41E-04      |
| tRNA-splicing ligase RtcB homolog                                        | <i>RTCB</i>   | -1.2926 | 0.2525  | 0.5822  | 1.5451                | 1.8748                | -                     | -                                   | 1.29E-03      |
| Reticulon;Reticulon-4                                                    | <i>RTN4</i>   | 2.1518  | 1.5947  | 1.3405  | -0.5571               | -0.8113               | 0.2542                | ↓                                   | 5.02E-05      |
| RuvB-like 1                                                              | <i>RUVBL1</i> | -0.4877 | 0.6553  | 1.1276  | 1.1430                | 1.6153                | -0.4723               | ↑                                   | 5.43E-06      |
| RuvB-like 2                                                              | <i>RUVBL2</i> | -1.7026 | 0.4851  | 0.9080  | 2.1877                | 2.6106                | -0.4230               | ↑                                   | 4.56E-06      |
| Deoxynucleoside triphosphate triphosphohydrolase SAMHD1                  | <i>SAMHD1</i> | 0.4126  | 1.5340  | 1.3748  | 1.1213                | 0.9622                | -                     | -                                   | 2.64E-05      |
| SAP domain-containing ribonucleoprotein                                  | <i>SARNP</i>  | -3.5699 | -2.2041 | -2.2934 | 1.3659                | 1.2765                | -                     | -                                   | 4.36E-02      |
| Serine--tRNA ligase, cytoplasmic                                         | <i>SARS</i>   | -1.5758 | -0.5031 | 0.1957  | 1.0727                | 1.7715                | -0.6988               | ↑                                   | 2.65E-04      |
| Succinate dehydrogenase [ubiquinone] flavoprotein                        | <i>SDHA</i>   | -0.5211 | -1.3959 | -1.6785 | -0.8748               | -1.1573               | -                     | -                                   | 3.27E-03      |

| Protein Name                                                                                                          | Gene Symbol     | MNT LFQ | MPT LFQ | MLN LFQ | MPT x MNT fold change | MLN x MNT fold change | MPT x MLN fold change | Gradual ↑/↓ from MNT to MPT to MLN* | ANOVA p-value |
|-----------------------------------------------------------------------------------------------------------------------|-----------------|---------|---------|---------|-----------------------|-----------------------|-----------------------|-------------------------------------|---------------|
| subunit, mitochondrial                                                                                                |                 |         |         |         |                       |                       |                       |                                     |               |
| Succinate dehydrogenase [ubiquinone] iron-sulfur subunit, mitochondrial                                               | <i>SDHB</i>     | -1.5520 | -2.5980 | -2.1818 | -1.0461               | -0.6298               | -0.4162               | -                                   | 2.92E-04      |
| Signal peptidase complex catalytic subunit SEC11;Signal peptidase complex catalytic subunit SEC11A;Signal peptidase I | <i>SEC11A</i>   | -1.3372 | -1.9606 | -2.1818 | -0.6234               | -0.8445               | -                     | -                                   | 4.36E-03      |
| Vesicle-trafficking protein SEC22b                                                                                    | <i>SEC22B</i>   | -0.9576 | -0.3832 | -0.4396 | 0.5745                | 0.5181                | -                     | -                                   | 3.07E-02      |
| Protein transport protein Sec31A                                                                                      | <i>SEC31A</i>   | -0.5912 | 0.5969  | 0.4448  | 1.1881                | 1.0360                | -                     | -                                   | 3.85E-05      |
| Translocation protein SEC63 homolog                                                                                   | <i>SEC63</i>    | -2.4427 | -1.4581 | -1.7756 | 0.9846                | -                     | -                     | -                                   | 4.77E-02      |
| Selenium-binding protein 1                                                                                            | <i>SELENBP1</i> | 3.0459  | 1.1404  | 0.8430  | -1.9055               | -2.2029               | 0.2974                | ↓                                   | 1.28E-09      |
| Septin-11                                                                                                             | <i>SEPT11</i>   | 0.4979  | -0.3703 | -1.4990 | -0.8682               | -1.9969               | 1.1287                | ↓                                   | 8.04E-08      |
| Septin-2                                                                                                              | <i>SEPT2</i>    | 0.8180  | 0.5020  | 0.2627  | -                     | -0.5553               | -                     | -                                   | 4.54E-02      |
| Septin-9                                                                                                              | <i>SEPT9</i>    | 0.0833  | 0.2365  | 0.6119  | -                     | 0.5285                | -0.3754               | -                                   | 2.56E-02      |
| Alpha-1-antitrypsin;Short peptide from AAT                                                                            | <i>SERPINA1</i> | 5.6056  | 5.0780  | 4.9804  | -0.5276               | -0.6252               | -                     | -                                   | 3.85E-03      |
| Alpha-1-antichymotrypsin;Alpha-1-antichymotrypsin His-Pro-less                                                        | <i>SERPINA3</i> | 3.2551  | 2.6684  | 2.3131  | -0.5867               | -0.9420               | 0.3553                | ↓                                   | 2.19E-05      |
| Kallistatin                                                                                                           | <i>SERPINA4</i> | -1.5138 | -2.3113 | -3.1261 | -                     | -1.6122               | -                     | -                                   | 7.71E-03      |
| Plasma serine protease inhibitor                                                                                      | <i>SERPINA5</i> | -1.5488 | -2.1817 | -2.0525 | -0.6329               | -                     | -                     | -                                   | 4.94E-02      |
| Leukocyte elastase inhibitor                                                                                          | <i>SERPINB1</i> | 1.4532  | 0.9560  | 1.6282  | -0.4972               | 0.1750                | -0.6722               | -                                   | 4.29E-05      |
| Serpin B6                                                                                                             | <i>SERPINB6</i> | 0.7237  | -0.1506 | -0.2380 | -0.8743               | -0.9617               | -                     | -                                   | 2.88E-05      |
| Antithrombin-III                                                                                                      | <i>SERPINC1</i> | 3.4852  | 2.2513  | 1.4771  | -1.2339               | -2.0081               | 0.7742                | ↓                                   | 9.71E-07      |
| Heparin cofactor 2                                                                                                    | <i>SERPIND1</i> | 1.7438  | -0.8025 | -1.5065 | -2.5463               | -3.2503               | 0.7040                | ↓                                   | 5.39E-08      |
| Pigment epithelium-derived factor                                                                                     | <i>SERPINF1</i> | 2.3878  | 2.2553  | 1.6081  | -0.1325               | -0.7797               | 0.6472                | ↓                                   | 2.79E-06      |
| Alpha-2-antiplasmin                                                                                                   | <i>SERPINF2</i> | 0.4205  | -2.2801 | -2.6577 | -2.7006               | -3.0782               | -                     | -                                   | 1.11E-03      |
| Plasma protease C1 inhibitor                                                                                          | <i>SERPING1</i> | 2.4909  | 1.4856  | 0.6461  | -1.0053               | -1.8448               | 0.8395                | ↓                                   | 9.22E-09      |
| Serpin H1                                                                                                             | <i>SERPINH1</i> | 1.8932  | 3.1695  | 2.0560  | 1.2763                | -                     | 1.1135                | -                                   | 1.21E-05      |

| Protein Name                                                        | Gene Symbol     | MNT LFQ | MPT LFQ | MLN LFQ | MPT x MNT fold change | MLN x MNT fold change | MPT x MLN fold change | Gradual ↑/↓ from MNT to MPT to MLN* | ANOVA p-value |
|---------------------------------------------------------------------|-----------------|---------|---------|---------|-----------------------|-----------------------|-----------------------|-------------------------------------|---------------|
| Splicing factor 3A subunit 1                                        | <i>SF3A1</i>    | -2.3383 | -1.3295 | -0.8489 | 1.0088                | 1.4895                | -                     | -                                   | 9.81E-03      |
| Splicing factor, proline- and glutamine-rich                        | <i>SFPQ</i>     | 0.3919  | 1.8633  | 1.9539  | 1.4714                | 1.5620                | -                     | -                                   | 9.25E-05      |
| Sideroflexin-1                                                      | <i>SFXN1</i>    | -1.5558 | -0.9528 | -0.1805 | 0.6030                | 1.3753                | -0.7723               | ↑                                   | 2.49E-03      |
| SH3 domain-binding glutamic acid-rich-like protein                  | <i>SH3BGRL</i>  | -0.6334 | 0.9192  | 0.8442  | 1.5526                | 1.4776                | -                     | -                                   | 2.74E-06      |
| Endophilin-B1                                                       | <i>SH3GLB1</i>  | -2.2517 | -3.2201 | -3.4557 | -0.9685               | -1.2040               | -                     | -                                   | 1.13E-02      |
| Tricarboxylate transport protein, mitochondrial                     | <i>SLC25A1</i>  | 0.9369  | -0.7725 | -0.8359 | -1.7094               | -1.7728               | -                     | -                                   | 3.68E-05      |
| Mitochondrial dicarboxylate carrier                                 | <i>SLC25A10</i> | -0.8484 | -1.4966 | -1.1796 | -0.6482               | -                     | -                     | -                                   | 1.64E-02      |
| Calcium-binding mitochondrial carrier protein Aralar1               | <i>SLC25A12</i> | -2.3481 | -2.9705 | -2.9513 | -0.6224               | -0.6032               | -                     | -                                   | 7.32E-03      |
| Calcium-binding mitochondrial carrier protein Aralar2               | <i>SLC25A13</i> | -2.0581 | -0.8481 | -0.5396 | 1.2100                | 1.5185                | -0.3085               | ↑                                   | 2.31E-05      |
| Calcium-binding mitochondrial carrier protein SCaMC-1               | <i>SLC25A24</i> | -2.2961 | -2.1595 | -1.8517 | -                     | 0.4444                | -                     | -                                   | 2.76E-02      |
| ADP/ATP translocase 3;ADP/ATP translocase 3, N-terminally processed | <i>SLC25A6</i>  | 1.5216  | 1.5544  | 1.3141  | -                     | -0.2075               | 0.2404                | -                                   | 3.07E-02      |
| Band 3 anion transport protein                                      | <i>SLC4A1</i>   | 3.5527  | -1.7120 | -3.0736 | -5.2647               | -6.6263               | 1.3616                | ↓                                   | 5.09E-07      |
| Na(+)/H(+) exchange regulatory cofactor NHE-RF1                     | <i>SLC9A3R1</i> | -2.8018 | 0.4771  | 1.0017  | 3.2788                | 3.8035                | -                     | -                                   | 8.36E-06      |
| Staphylococcal nuclease domain-containing protein 1                 | <i>SND1</i>     | 0.4449  | 1.6320  | 1.9940  | 1.1870                | 1.5491                | -0.3621               | ↑                                   | 4.10E-08      |
| U5 small nuclear ribonucleoprotein 200 kDa helicase                 | <i>SNRNP200</i> | -2.3850 | -0.4099 | -0.0059 | 1.9751                | 2.3791                | -                     | -                                   | 1.57E-04      |
| Sorting nexin-2                                                     | <i>SNX2</i>     | -0.5583 | -1.3379 | -1.3633 | -0.7796               | -0.8050               | -                     | -                                   | 7.05E-03      |
| Sorbin and SH3 domain-containing protein 1                          | <i>SORBS1</i>   | 1.1217  | -3.3356 | -4.0979 | -4.4572               | -5.2195               | -                     | -                                   | 9.33E-06      |
| Sorbitol dehydrogenase                                              | <i>SORD</i>     | -1.4568 | 2.1199  | 1.3943  | 3.5766                | 2.8511                | 0.7255                | -                                   | 2.76E-07      |
| Sepiapterin reductase                                               | <i>SPR</i>      | -1.5610 | -1.3096 | -0.2705 | -                     | 1.2905                | -1.0390               | -                                   | 2.64E-04      |
| Spectrin alpha chain, non-erythrocytic 1                            | <i>SPTAN1</i>   | 3.1083  | 1.7296  | 2.0616  | -1.3786               | -1.0466               | -0.3320               | -                                   | 2.50E-05      |
| Spectrin beta chain, non-erythrocytic 1                             | <i>SPTBN1</i>   | 2.9910  | 1.4154  | 1.4726  | -1.5756               | -1.5184               | -                     | -                                   | 1.72E-06      |

| Protein Name                                                                                                   | Gene Symbol    | MNT LFQ | MPT LFQ | MLN LFQ | MPT x MNT fold change | MLN x MNT fold change | MPT x MLN fold change | Gradual ↑/↓ from MNT to MPT to MLN* | ANOVA p-value |
|----------------------------------------------------------------------------------------------------------------|----------------|---------|---------|---------|-----------------------|-----------------------|-----------------------|-------------------------------------|---------------|
| Sulfide:quinone oxidoreductase, mitochondrial                                                                  | <i>SQRDL</i>   | -0.0665 | 1.1114  | 0.8478  | 1.1779                | 0.9142                | -                     | -                                   | 2.64E-04      |
| Signal recognition particle subunit SRP68                                                                      | <i>SRP68</i>   | -1.9496 | -1.1965 | -1.7949 | 0.7532                | -                     | 0.5984                | -                                   | 3.45E-02      |
| Serine/arginine-rich splicing factor 2                                                                         | <i>SRSF2</i>   | -2.0185 | -0.2075 | -0.3944 | 1.8110                | 1.6241                | -                     | -                                   | 3.80E-04      |
| Serine/arginine-rich splicing factor 3                                                                         | <i>SRSF3</i>   | -1.9598 | 0.1341  | 0.3935  | 2.0939                | 2.3533                | -                     | -                                   | 3.90E-05      |
| Serine/arginine-rich splicing factor 6                                                                         | <i>SRSF6</i>   | -1.7539 | -0.2338 | 0.0059  | 1.5201                | 1.7597                | -                     | -                                   | 1.43E-02      |
| Serine/arginine-rich splicing factor 7                                                                         | <i>SRSF7</i>   | -1.9797 | -0.4400 | -0.2969 | 1.5397                | 1.6828                | -                     | -                                   | 1.43E-03      |
| Translocon-associated protein subunit alpha                                                                    | <i>SSR1</i>    | -2.0378 | -0.5963 | -0.6023 | 1.4416                | 1.4355                | -                     | -                                   | 1.20E-04      |
| Translocon-associated protein subunit delta                                                                    | <i>SSR4</i>    | -1.1430 | -0.7621 | -0.1867 | -                     | 0.9563                | -0.5754               | -                                   | 4.18E-03      |
| Signal transducer and activator of transcription 1-alpha/beta;Signal transducer and activator of transcription | <i>STAT1</i>   | -1.6160 | 1.9952  | 2.7418  | 3.6113                | 4.3579                | -0.7466               | ↑                                   | 1.49E-06      |
| Stress-induced-phosphoprotein 1                                                                                | <i>STIP1</i>   | 0.0167  | 1.4710  | 1.6141  | 1.4544                | 1.5974                | -                     | -                                   | 1.41E-05      |
| Succinyl-CoA ligase [ADP-forming] subunit beta, mitochondrial                                                  | <i>SUCLA2</i>  | -0.5518 | -1.4079 | -1.8149 | -0.8561               | -1.2631               | 0.4070                | ↓                                   | 2.26E-04      |
| Succinyl-CoA ligase [GDP-forming] subunit beta, mitochondrial                                                  | <i>SUCLG2</i>  | -0.2014 | -0.8605 | -0.6337 | -0.6591               | -0.4323               | -                     | -                                   | 1.74E-03      |
| Heterogeneous nuclear ribonucleoprotein Q                                                                      | <i>SYNCRIP</i> | 0.0641  | 1.8336  | 2.2367  | 1.7695                | 2.1725                | -0.4030               | ↑                                   | 1.16E-06      |
| Transgelin                                                                                                     | <i>TAGLN</i>   | 3.6600  | 3.5250  | 2.2252  | -                     | -1.4347               | 1.2997                | -                                   | 2.12E-04      |
| Transgelin-2                                                                                                   | <i>TAGLN2</i>  | 0.9782  | 2.3424  | 2.1031  | 1.3642                | 1.1249                | -                     | -                                   | 1.26E-04      |
| Transaldolase                                                                                                  | <i>TALDO1</i>  | 1.5865  | 1.1796  | 0.9580  | -0.4069               | -0.6285               | 0.2216                | ↓                                   | 1.89E-04      |
| Threonine--tRNA ligase, cytoplasmic                                                                            | <i>TARS</i>    | -1.3994 | -0.5291 | -0.3316 | 0.8703                | 1.0679                | -                     | -                                   | 4.74E-05      |
| T-complex protein 1 subunit alpha                                                                              | <i>TCPI1</i>   | 0.2923  | 0.9540  | 1.2270  | 0.6616                | 0.9347                | -                     | -                                   | 3.80E-04      |
| Serotransferrin                                                                                                | <i>TF</i>      | 5.4598  | 4.6124  | 4.0977  | -0.8474               | -1.3621               | 0.5147                | ↓                                   | 2.34E-04      |
| Transforming growth factor beta-1-induced transcript 1 protein                                                 | <i>TGFB1I1</i> | -4.0819 | -4.5850 | -5.2515 | -0.5031               | -1.1696               | 0.6665                | ↓                                   | 7.93E-04      |
| Transforming growth factor-beta-induced protein ig-h3                                                          | <i>TGFBI</i>   | 2.0923  | 2.6792  | 1.4971  | 0.5869                | -0.5952               | 1.1820                | -                                   | 1.60E-05      |

| Protein Name                                     | Gene Symbol   | MNT LFQ | MPT LFQ | MLN LFQ | MPT x MNT fold change | MLN x MNT fold change | MPT x MLN fold change | Gradual ↑/↓ from MNT to MPT to MLN* | ANOVA p-value |
|--------------------------------------------------|---------------|---------|---------|---------|-----------------------|-----------------------|-----------------------|-------------------------------------|---------------|
| Protein-glutamine gamma-glutamyltransferase 2    | <i>TGM2</i>   | 0.7534  | 0.6979  | 1.1621  | -                     | 0.4087                | -0.4641               | -                                   | 2.07E-03      |
| Thrombospondin-1                                 | <i>THBS1</i>  | 0.7646  | 3.1334  | 2.2863  | 2.3688                | 1.5217                | 0.8471                | -                                   | 3.12E-07      |
| Transketolase                                    | <i>TKT</i>    | 3.1376  | 3.0938  | 2.9502  | -                     | -0.1873               | -                     | -                                   | 4.54E-02      |
| Talin-1                                          | <i>TLN1</i>   | 2.9640  | 2.8538  | 2.6206  | -                     | -0.3434               | 0.2332                | -                                   | 7.36E-03      |
| Transmembrane emp24 domain-containing protein 10 | <i>TMED10</i> | -0.6231 | 0.3828  | 0.1114  | 1.0059                | 0.7344                | -                     | -                                   | 2.04E-03      |
| Transmembrane protein 43                         | <i>TMEM43</i> | 0.7428  | 0.5481  | 0.0565  | -                     | -0.6863               | 0.4916                | -                                   | 4.39E-03      |
| Tenascin                                         | <i>TNC</i>    | 0.5871  | 2.5731  | 0.8763  | 1.9860                | 0.2892                | 1.6968                | -                                   | 3.48E-07      |
| Tensin-1                                         | <i>TNS1</i>   | 1.5678  | -1.8431 | -2.3624 | -3.4109               | -3.9302               | 0.5193                | ↓                                   | 4.31E-08      |
| Tenascin-X                                       | <i>TNXB</i>   | 1.3189  | -3.6676 | -4.6270 | -4.9865               | -5.9459               | 0.9594                | ↓                                   | 8.76E-07      |
| Triosephosphate isomerase                        | <i>TPI1</i>   | 2.4839  | 3.7518  | 3.6485  | 1.2678                | 1.1646                | -                     | -                                   | 3.98E-05      |
| Tropomyosin alpha-1 chain                        | <i>TPM1</i>   | 1.4227  | 0.1711  | -1.0312 | -1.2516               | -2.4540               | 1.2024                | ↓                                   | 8.46E-05      |
| Tropomyosin alpha-4 chain                        | <i>TPM4</i>   | 0.6621  | 1.2861  | 0.3420  | -                     | -                     | 0.9440                | -                                   | 3.65E-02      |
| Translationally-controlled tumor protein         | <i>TPT1</i>   | -1.3790 | -0.8819 | -0.4729 | 0.4971                | 0.9061                | -                     | -                                   | 6.71E-03      |
| Heat shock protein 75 kDa, mitochondrial         | <i>TRAP1</i>  | -2.5908 | -0.9483 | -0.5966 | 1.6426                | 1.9943                | -                     | -                                   | 3.99E-02      |
| 60 kDa SS-A/Ro ribonucleoprotein                 | <i>TROVE2</i> | -1.4639 | -0.3816 | -0.7369 | 1.0823                | 0.7270                | 0.3553                | -                                   | 1.02E-05      |
| Translin                                         | <i>TSN</i>    | -1.3666 | -0.9571 | -1.1635 | 0.4095                | -                     | -                     | -                                   | 2.10E-02      |
| Tubulin--tyrosine ligase-like protein 12         | <i>TLL12</i>  | -1.1334 | 1.1320  | 2.8059  | 2.2654                | 3.9393                | -1.6739               | ↑                                   | 5.08E-09      |
| Titin                                            | <i>TTN</i>    | -0.3177 | -1.0081 | -1.2533 | -0.6904               | -0.9356               | 0.2452                | ↓                                   | 1.54E-04      |
| Transthyretin                                    | <i>TTR</i>    | 2.7590  | 1.7678  | 1.4575  | -0.9912               | -1.3015               | 0.3103                | ↓                                   | 4.72E-06      |
| Tubulin beta chain                               | <i>TUBB</i>   | 2.1900  | 3.8437  | 4.1848  | 1.6537                | 1.9948                | -                     | -                                   | 3.64E-05      |
| Tubulin beta-4B chain                            | <i>TUBB4B</i> | 3.5757  | 5.2204  | 5.4828  | 1.6447                | 1.9071                | -                     | -                                   | 3.52E-06      |
| Tubulin beta-6 chain                             | <i>TUBB6</i>  | -0.2265 | -1.4931 | -2.7634 | -1.2666               | -2.5369               | 1.2703                | ↓                                   | 9.27E-08      |
| Elongation factor Tu, mitochondrial              | <i>TUFM</i>   | 1.3309  | 2.4493  | 2.7023  | 1.1184                | 1.3714                | -0.2530               | ↑                                   | 2.53E-07      |

| Protein Name                                                                      | Gene Symbol   | MNT LFQ | MPT LFQ | MLN LFQ | MPT x MNT fold change | MLN x MNT fold change | MPT x MLN fold change | Gradual ↑/↓ from MNT to MPT to MLN* | ANOVA p-value |
|-----------------------------------------------------------------------------------|---------------|---------|---------|---------|-----------------------|-----------------------|-----------------------|-------------------------------------|---------------|
| Thioredoxin domain-containing protein 5                                           | <i>TXNDC5</i> | -1.5932 | -0.7872 | 1.4591  | 0.8060                | 3.0523                | -2.2464               | ↑                                   | 2.88E-06      |
| Thymidine phosphorylase                                                           | <i>TYMP</i>   | -1.3742 | 1.9053  | 1.9692  | 3.2796                | 3.3435                | -                     | -                                   | 5.10E-05      |
| Splicing factor U2AF 65 kDa subunit                                               | <i>U2AF2</i>  | -2.9283 | -0.2138 | -0.2659 | 2.7145                | 2.6624                | -                     | -                                   | 4.00E-04      |
| Ubiquitin-like modifier-activating enzyme 1                                       | <i>UBA1</i>   | 1.7062  | 2.7288  | 3.1818  | 1.0226                | 1.4756                | -0.4530               | ↑                                   | 7.04E-07      |
| Ubiquitin-conjugating enzyme E2 N;Putative ubiquitin-conjugating enzyme E2 N-like | <i>UBE2N</i>  | 0.0116  | 0.1184  | 0.5086  | -                     | 0.4970                | -0.3903               | -                                   | 1.72E-02      |
| Ubiquitin-conjugating enzyme E2 variant 1                                         | <i>UBE2V1</i> | -0.0948 | -0.0022 | 0.3389  | -                     | 0.4337                | -0.3412               | -                                   | 2.60E-02      |
| UDP-glucose 6-dehydrogenase                                                       | <i>UGDH</i>   | -0.2996 | 1.5473  | 1.7181  | 1.8469                | 2.0177                | -                     | -                                   | 6.22E-05      |
| UTP--glucose-1-phosphate uridylyltransferase                                      | <i>UGP2</i>   | 2.4714  | 0.8641  | 0.7377  | -1.6073               | -1.7338               | -                     | -                                   | 1.08E-07      |
| Cytochrome b-c1 complex subunit 1, mitochondrial                                  | <i>UQCRC1</i> | 0.3573  | 0.0224  | -0.2287 | -0.3349               | -0.5860               | -                     | -                                   | 9.42E-03      |
| Cytochrome b-c1 complex subunit 2, mitochondrial                                  | <i>UQCRC2</i> | 1.0276  | 1.4413  | 1.1470  | 0.4138                | -                     | 0.2943                | -                                   | 1.79E-02      |
| General vesicular transport factor p115                                           | <i>USO1</i>   | -0.9351 | 0.1219  | -0.1215 | 1.0570                | 0.8137                | -                     | -                                   | 3.18E-04      |
| Ubiquitin carboxyl-terminal hydrolase;Ubiquitin carboxyl-terminal hydrolase 14    | <i>USP14</i>  | -1.0963 | -0.4889 | -0.1065 | 0.6074                | 0.9898                | -                     | -                                   | 2.73E-03      |
| Ubiquitin carboxyl-terminal hydrolase 5                                           | <i>USP5</i>   | -0.0851 | 1.2517  | 1.9549  | 1.3369                | 2.0400                | -0.7031               | ↑                                   | 9.59E-06      |
| Ubiquitin carboxyl-terminal hydrolase 7;Ubiquitin carboxyl-terminal hydrolase     | <i>USP7</i>   | -2.5853 | -1.5270 | -1.1071 | 1.0583                | 1.4782                | -                     | -                                   | 2.12E-03      |
| Vesicle-associated membrane protein-associated protein B/C                        | <i>VAPB</i>   | -1.6181 | -0.1894 | -0.4464 | 1.4288                | 1.1717                | -                     | -                                   | 1.49E-04      |
| Valine--tRNA ligase                                                               | <i>VAR5</i>   | -1.6652 | 0.1034  | 1.1202  | 1.7686                | 2.7854                | -1.0168               | ↑                                   | 1.90E-05      |
| Synaptic vesicle membrane protein VAT-1 homolog                                   | <i>VATI</i>   | 1.5056  | 1.1588  | 1.0005  | -                     | -0.5051               | -                     | -                                   | 3.99E-02      |
| Vinculin                                                                          | <i>VCL</i>    | 3.2670  | 2.6322  | 2.1436  | -0.6348               | -1.1234               | 0.4886                | ↓                                   | 2.37E-06      |
| Transitional endoplasmic reticulum ATPase                                         | <i>VCP</i>    | 1.9196  | 2.7391  | 3.3752  | 0.8195                | 1.4555                | -0.6360               | ↑                                   | 2.56E-06      |
| Voltage-dependent anion-selective channel protein 1                               | <i>VDAC1</i>  | 1.6327  | 3.0610  | 3.4112  | 1.4283                | 1.7785                | -0.3502               | ↑                                   | 1.30E-07      |
| Voltage-dependent anion-selective channel protein 2                               | <i>VDAC2</i>  | 1.7834  | 2.2959  | 2.7222  | 0.5125                | 0.9388                | -0.4264               | ↑                                   | 2.60E-04      |



| Protein Name                                                                | Gene Symbol  | MNT LFQ | MPT LFQ | MLN LFQ | MPT x MNT fold change | MLN x MNT fold change | MPT x MLN fold change | Gradual ↑/↓ from MNT to MPT to MLN* | ANOVA p-value |
|-----------------------------------------------------------------------------|--------------|---------|---------|---------|-----------------------|-----------------------|-----------------------|-------------------------------------|---------------|
| Voltage-dependent anion-selective channel protein 3                         | <i>VDAC3</i> | 0.5339  | 1.9125  | 2.0368  | 1.3786                | 1.5029                | -                     | -                                   | 3.52E-04      |
| Vimentin                                                                    | <i>VIM</i>   | 6.2705  | 6.9550  | 6.6820  | 0.6845                | 0.4115                | -                     | -                                   | 2.66E-03      |
| Vacuolar protein sorting-associated protein 35                              | <i>VPS35</i> | 0.8695  | 0.5475  | 0.9528  | -0.3221               | -                     | -0.4053               | -                                   | 5.38E-03      |
| Tryptophan--tRNA ligase, cytoplasmic;T1-TrpRS;T2-TrpRS                      | <i>WARS</i>  | 0.1960  | 0.5034  | 0.6372  | 0.3074                | 0.4412                | -                     | -                                   | 2.93E-02      |
| WD repeat-containing protein 1                                              | <i>WDR1</i>  | 1.2668  | 1.9033  | 2.3254  | 0.6365                | 1.0586                | -0.4221               | ↑                                   | 5.92E-05      |
| Exportin-1                                                                  | <i>XPO1</i>  | -1.1337 | 0.0643  | 0.2791  | 1.1980                | 1.4129                | -                     | -                                   | 2.63E-04      |
| X-ray repair cross-complementing protein 5                                  | <i>XRCC5</i> | 0.8000  | 1.8095  | 2.2779  | 1.0095                | 1.4778                | -0.4683               | ↑                                   | 7.54E-05      |
| X-ray repair cross-complementing protein 6                                  | <i>XRCC6</i> | 1.1470  | 2.3779  | 2.9898  | 1.2308                | 1.8428                | -0.6119               | ↑                                   | 1.52E-07      |
| 14-3-3 protein beta/alpha;14-3-3 protein beta/alpha, N-terminally processed | <i>YWHAH</i> | 0.4680  | 0.8223  | 0.5976  | 0.3543                | -                     | 0.2246                | -                                   | 1.46E-02      |
| 14-3-3 protein eta                                                          | <i>YWHAH</i> | 0.2028  | 0.3833  | -0.4275 | -                     | -0.6304               | 0.8108                | -                                   | 1.76E-02      |
| 14-3-3 protein theta                                                        | <i>YWHAQ</i> | 0.1117  | 0.0032  | 0.5848  | -                     | 0.4731                | -0.5816               | -                                   | 1.79E-02      |
| Zyxin                                                                       | <i>ZYX</i>   | -1.2323 | -1.4022 | -1.8590 | -                     | -0.6267               | 0.4568                | -                                   | 1.39E-03      |
