# Supplementary material for: Integrated analysis of label-free quantitative proteomics and bioinformatics reveal insights into signaling pathways in male breast cancer
Source: PubMed Central journal article supplement (PMC7926483; doi:10.1590/1678-4685-gmb-2019-0410), 2021-03-01
Supplement: 1415-4757-GMB-44-1-e20190410-suppl3.pdf [file 1415-4757-GMB-44-1-e20190410-suppl3.pdf]

## Supplementary Material to “Integrated analysis of label-free quantitative proteomics and bioinformatics reveal insights into signaling pathways in male breast cancer”

**Table S3 - A.** Differentially expressed proteins into the log<sub>2</sub> fold change values identified for MPT x MNT tissues' comparison according to the ANOVA's test. LFQ intensities were log<sub>2</sub>-transformed and normalized by width adjustment in Perseus v. 1.5.6.0. Fold changes were presented in log<sub>2</sub> values. **B.** Main upstream regulators analysis of the differentially expressed proteins identified in the MPT x MNT tissues' comparison. (IPA analysis). The ANOVA and IPA p-values were adjusted by Benjamini-Hochberg FDR of 0.05.

**A.**

| Protein Name                                                        | Gene Symbol    | MNT LFQ | MPT LFQ | MLN LFQ | MPT x MNT fold change | ANOVA p-value |
|---------------------------------------------------------------------|----------------|---------|---------|---------|-----------------------|---------------|
| Alpha-1B-glycoprotein                                               | <i>A1BG</i>    | 2.1274  | 0.4713  | 0.4517  | -1.6561               | 1.65E-03      |
| Alpha/beta hydrolase domain-containing protein 14B                  | <i>ABHD14B</i> | 0.5174  | -1.6124 | -1.2778 | -2.1298               | 8.50E-06      |
| 3-ketoacyl-CoA thiolase, mitochondrial                              | <i>ACAA2</i>   | 1.2126  | -0.8760 | -0.8970 | -2.0886               | 5.97E-06      |
| Acetyl-CoA carboxylase 2                                            | <i>ACACB</i>   | 0.7338  | -3.8072 | -3.7810 | -4.5410               | 2.57E-04      |
| Medium-chain specific acyl-CoA dehydrogenase, mitochondrial         | <i>ACADM</i>   | 0.4431  | -1.9845 | -1.0689 | -2.4277               | 5.06E-05      |
| Short-chain specific acyl-CoA dehydrogenase, mitochondrial          | <i>ACADS</i>   | 1.0767  | -2.8929 | -2.5097 | -3.9696               | 1.53E-06      |
| Short/branched chain specific acyl-CoA dehydrogenase, mitochondrial | <i>ACADSB</i>  | -1.6947 | 0.2021  | 0.4542  | 1.8968                | 5.96E-07      |
| Cytoplasmic aconitate hydratase                                     | <i>ACO1</i>    | 1.3932  | -0.1895 | -0.4186 | -1.5827               | 5.34E-06      |
| Acyl-coenzyme A thioesterase 1                                      | <i>ACOT1</i>   | 1.8228  | -0.9927 | -0.0417 | -2.8155               | 8.08E-06      |
| Long-chain-fatty-acid--CoA ligase 1                                 | <i>ACSL1</i>   | 3.5536  | -2.4079 | -2.4161 | -5.9615               | 2.22E-06      |
| Alcohol dehydrogenase class-3                                       | <i>ADH5</i>    | 0.4225  | -1.5999 | -1.2975 | -2.0224               | 3.39E-04      |
| Adipocyte enhancer-binding protein 1                                | <i>AEBP1</i>   | -0.8130 | 0.9414  | 0.2247  | 1.7544                | 6.59E-05      |
| Afamin                                                              | <i>AFM</i>     | 0.8953  | -1.0592 | -1.6164 | -1.9545               | 4.64E-05      |
| Anterior gradient protein 2 homolog                                 | <i>AGR2</i>    | -2.1493 | 1.1504  | 1.0164  | 3.2997                | 6.05E-06      |

| Protein Name                                                         | Gene Symbol    | MNT Lfq | MPT Lfq | MLN Lfq | MPT x MNT fold change | ANOVA p-value |
|----------------------------------------------------------------------|----------------|---------|---------|---------|-----------------------|---------------|
| Angiotensinogen                                                      | <i>AGT</i>     | 1.4353  | -0.1363 | -0.9917 | -1.5716               | 2.63E-07      |
| Alpha-2-HS-glycoprotein                                              | <i>AHSG</i>    | 1.1837  | -1.4220 | -3.9872 | -2.6057               | 4.35E-07      |
| Adenylate kinase 4, mitochondrial                                    | <i>AK4</i>     | 0.3137  | -2.2435 | -3.2467 | -2.5572               | 8.26E-04      |
| Retinal dehydrogenase 1                                              | <i>ALDH1A1</i> | 1.9275  | 0.3203  | 0.1418  | -1.6072               | 8.89E-08      |
| Aldehyde dehydrogenase, mitochondrial                                | <i>ALDH2</i>   | 3.6553  | 1.5342  | 0.9643  | -2.1212               | 4.99E-07      |
| Methylmalonate-semialdehyde dehydrogenase [acylating], mitochondrial | <i>ALDH6A1</i> | 0.1925  | -2.4772 | -2.3352 | -2.6698               | 2.46E-04      |
| Fructose-bisphosphate aldolase A                                     | <i>ALDOA</i>   | 2.8319  | 4.5608  | 4.3895  | 1.7289                | 6.19E-06      |
| Annexin                                                              | <i>ANXA3</i>   | 0.1418  | -2.6747 | -2.6454 | -2.8164               | 2.46E-04      |
| AP-1 complex subunit gamma-1                                         | <i>APIG1</i>   | -2.5762 | -0.9982 | -1.1089 | 1.5780                | 3.20E-05      |
| Apolipoprotein B-100                                                 | <i>APOB</i>    | 3.1646  | 1.3936  | 0.1567  | -1.7710               | 1.65E-07      |
| Apolipoprotein D                                                     | <i>APOD</i>    | 1.0605  | -0.9834 | -2.1300 | -2.0439               | 1.42E-05      |
| Apolipoprotein E                                                     | <i>APOE</i>    | 0.8823  | -0.7092 | -0.9790 | -1.5915               | 1.12E-04      |
| Adenine phosphoribosyltransferase                                    | <i>APRT</i>    | -1.8936 | -0.3706 | 0.0113  | 1.5230                | 1.73E-06      |
| Coatomer subunit delta                                               | <i>ARCNI</i>   | -2.2693 | -0.3386 | -0.1878 | 1.9306                | 2.51E-04      |
| Aspartyl/asparaginyl beta-hydroxylase                                | <i>ASPH</i>    | 0.8701  | -0.6635 | -1.7129 | -1.5336               | 7.73E-05      |
| Argininosuccinate synthase                                           | <i>ASS1</i>    | 0.5685  | -4.5490 | -4.9874 | -5.1176               | 3.82E-07      |
| Flavin reductase (NADPH)                                             | <i>BLVRB</i>   | 2.4902  | 0.3637  | 0.3085  | -2.1264               | 5.31E-07      |
| Bisphosphoglycerate mutase                                           | <i>BPGM</i>    | 1.0392  | -4.1536 | -4.4148 | -5.1928               | 2.52E-08      |
| Complement C1s subcomponent                                          | <i>C1S</i>     | -1.2571 | -3.0649 | -3.3103 | -1.8078               | 1.90E-04      |
| Complement C5                                                        | <i>C5</i>      | 0.5269  | -2.2444 | -3.1069 | -2.7713               | 1.94E-05      |
| Carbonic anhydrase 1                                                 | <i>CA1</i>     | 5.0484  | 1.7324  | 1.7200  | -3.3160               | 1.22E-07      |
| Carbonic anhydrase 2                                                 | <i>CA2</i>     | 3.0463  | 0.4364  | 2.3018  | -2.6099               | 3.57E-07      |
| Calcyclin-binding protein                                            | <i>CACYBP</i>  | -1.0595 | 1.2460  | 1.5421  | 2.3055                | 1.09E-07      |
| Calretinin                                                           | <i>CALB2</i>   | 0.6328  | -4.4251 | -4.8767 | -5.0579               | 9.60E-06      |

| Protein Name                                  | Gene Symbol    | MNT Lfq | MPT Lfq | MLN Lfq | MPT x MNT fold change | ANOVA p-value |
|-----------------------------------------------|----------------|---------|---------|---------|-----------------------|---------------|
| Cullin-associated NEDD8-dissociated protein 1 | <i>CAND1</i>   | 1.3116  | 2.8206  | 2.6251  | 1.5090                | 1.42E-06      |
| Macrophage-capping protein                    | <i>CAPG</i>    | -0.7206 | 1.4330  | 1.6238  | 2.1535                | 6.80E-08      |
| Catalase                                      | <i>CAT</i>     | 3.6991  | 1.5582  | 1.5014  | -2.1409               | 2.46E-07      |
| Caveolin-1                                    | <i>CAV1</i>    | 2.2061  | -1.8566 | -1.9755 | -4.0627               | 4.11E-06      |
| Chromobox protein homolog 3                   | <i>CBX3</i>    | -2.2486 | -0.2631 | 0.2724  | 1.9855                | 1.19E-04      |
| Platelet glycoprotein 4                       | <i>CD36</i>    | 3.3264  | -3.9301 | -3.6375 | -7.2565               | 5.27E-08      |
| Liver carboxylesterase 1                      | <i>CES1</i>    | 1.9947  | -1.2855 | -1.8148 | -3.2802               | 3.14E-06      |
| Complement factor H                           | <i>CFH</i>     | 1.8955  | 0.2190  | -1.3321 | -1.6765               | 4.35E-06      |
| Cytoskeleton-associated protein 4             | <i>CKAP4</i>   | -0.1520 | 1.4944  | 1.1412  | 1.6463                | 2.90E-06      |
| Creatine kinase B-type                        | <i>CKB</i>     | 1.2992  | -1.6374 | -1.7731 | -2.9366               | 1.57E-05      |
| Tetranectin                                   | <i>CLEC3B</i>  | 0.6369  | -1.1834 | -1.7043 | -1.8203               | 5.86E-05      |
| Calponin-1                                    | <i>CNN1</i>    | 2.3538  | -0.0842 | -2.7271 | -2.4380               | 8.57E-06      |
| Collagen alpha-1(XII) chain                   | <i>COL12A1</i> | 2.2517  | 4.7556  | 3.0561  | 2.5039                | 8.88E-09      |
| Collagen alpha-1(XVIII) chain                 | <i>COL18A1</i> | 0.8185  | -1.4648 | -2.5465 | -2.2833               | 4.24E-08      |
| Coatomer subunit beta                         | <i>COPB1</i>   | -0.9751 | 0.8973  | 1.1246  | 1.8724                | 4.49E-06      |
| Coatomer subunit gamma-1                      | <i>COPG1</i>   | -1.4863 | 0.6920  | 0.8275  | 2.1783                | 1.40E-05      |
| Mast cell carboxypeptidase A                  | <i>CPA3</i>    | 1.9123  | 0.3349  | -3.2596 | -1.5774               | 2.90E-08      |
| Cellular retinoic acid-binding protein 2      | <i>CRABP2</i>  | -1.4784 | 1.4132  | 0.2527  | 2.8915                | 1.75E-03      |
| Alpha-crystallin B chain                      | <i>CRYAB</i>   | 2.5615  | -3.3989 | -3.3540 | -5.9603               | 3.25E-07      |
| Exportin-2                                    | <i>CSE1L</i>   | 0.9154  | 2.7027  | 3.1500  | 1.7873                | 4.46E-06      |
| Cystatin-A                                    | <i>CSTA</i>    | 0.0320  | -3.3106 | -3.3851 | -3.3426               | 2.34E-04      |
| Cathepsin D                                   | <i>CTSD</i>    | 1.3822  | 3.0030  | 3.0946  | 1.6208                | 2.78E-06      |
| NADH-cytochrome b5 reductase 1                | <i>CYB5R1</i>  | -0.2302 | 1.4042  | 2.1158  | 1.6344                | 2.82E-08      |
| Probable ATP-dependent RNA helicase DDX17     | <i>DDX17</i>   | -0.7879 | 1.1929  | 1.4026  | 1.9808                | 2.08E-03      |

| Protein Name                                               | Gene Symbol    | MNT Lfq | MPT Lfq | MLN Lfq | MPT x MNT fold change | ANOVA p-value |
|------------------------------------------------------------|----------------|---------|---------|---------|-----------------------|---------------|
| Spliceosome RNA helicase DDX39B                            | <i>DDX39B</i>  | 0.3976  | 1.9550  | 2.2677  | 1.5574                | 4.92E-07      |
| Probable ATP-dependent RNA helicase DDX5                   | <i>DDX5</i>    | -2.3036 | -0.1424 | 0.4547  | 2.1612                | 5.14E-04      |
| Dehydrogenase/reductase SDR family member 2, mitochondrial | <i>DHRS2</i>   | -2.7286 | -1.1462 | 1.6987  | 1.5824                | 1.28E-05      |
| Pre-mRNA-splicing factor ATP-dependent RNA helicase DHX15  | <i>DHX15</i>   | -1.6481 | 0.0145  | 0.1670  | 1.6626                | 2.62E-04      |
| Dipeptidyl peptidase 3                                     | <i>DPP3</i>    | -1.2255 | 0.3189  | 0.6763  | 1.5444                | 1.47E-05      |
| Desmoplakin                                                | <i>DSP</i>     | -2.3338 | 0.2624  | 0.9284  | 2.5962                | 3.44E-04      |
| Enoyl-CoA hydratase, mitochondrial                         | <i>ECHS1</i>   | 1.9860  | 0.0975  | 0.2648  | -1.8885               | 5.13E-05      |
| Enoyl-CoA delta isomerase 1, mitochondrial                 | <i>ECI1</i>    | -1.5809 | 0.2388  | 0.3379  | 1.8197                | 4.40E-05      |
| Elongation factor 1-delta                                  | <i>EEF1D</i>   | 0.2986  | 1.8765  | 2.3384  | 1.5779                | 1.03E-05      |
| EF-hand domain-containing protein D1                       | <i>EFHD1</i>   | -1.6095 | 0.5111  | 1.0039  | 2.1205                | 1.05E-05      |
| 116 kDa U5 small nuclear ribonucleoprotein component       | <i>EFTUD2</i>  | -1.6382 | 0.2547  | 0.0454  | 1.8929                | 5.81E-04      |
| EH domain-containing protein 2                             | <i>EHD2</i>    | 4.3360  | 1.4223  | 1.2143  | -2.9137               | 9.59E-08      |
| Electron transfer flavoprotein subunit beta                | <i>ETFB</i>    | 0.9740  | -1.0932 | -0.3484 | -2.0672               | 3.12E-05      |
| Ezrin                                                      | <i>EZR</i>     | -2.1635 | -0.0784 | 0.6321  | 2.0851                | 7.20E-03      |
| Prothrombin                                                | <i>F2</i>      | 0.8241  | -1.3182 | -1.6662 | -2.1423               | 4.02E-08      |
| Fatty acid-binding protein, adipocyte                      | <i>FABP4</i>   | 4.4484  | -1.4501 | -1.6527 | -5.8985               | 2.84E-07      |
| Fumarylacetoacetase                                        | <i>FAH</i>     | 1.3862  | -1.7393 | -2.1171 | -3.1256               | 1.01E-05      |
| Redox-regulatory protein FAM213A                           | <i>FAM213A</i> | 1.5102  | -2.4306 | -1.6723 | -3.9408               | 8.36E-06      |
| Fatty acid synthase                                        | <i>FASN</i>    | 5.0826  | 7.0661  | 8.2690  | 1.9835                | 8.32E-08      |
| rRNA 2-O-methyltransferase fibrillarin                     | <i>FBL</i>     | -1.0720 | 1.1000  | 0.8973  | 2.1720                | 8.03E-06      |
| Fibrillin-1                                                | <i>FBN1</i>    | 3.1729  | 0.9808  | 0.1689  | -2.1921               | 3.59E-05      |
| Fibrinogen gamma chain                                     | <i>FGG</i>     | 4.8085  | 3.2972  | 2.4295  | -1.5113               | 5.40E-07      |
| Peptidyl-prolyl cis-trans isomerase FKBP4                  | <i>FKBP4</i>   | 0.0301  | 3.1529  | 4.0059  | 3.1227                | 3.46E-10      |
| Fibromodulin                                               | <i>FMOD</i>    | 0.7103  | -2.1584 | -4.1646 | -2.8687               | 1.78E-05      |

| Protein Name                                             | Gene Symbol      | MNT Lfq | MPT Lfq | MLN Lfq | MPT x MNT fold change | ANOVA p-value |
|----------------------------------------------------------|------------------|---------|---------|---------|-----------------------|---------------|
| Fibronectin                                              | <i>FNI</i>       | 3.2214  | 4.7464  | 3.3456  | 1.5250                | 3.57E-07      |
| Glyceraldehyde-3-phosphate dehydrogenase                 | <i>GAPDH</i>     | 3.4778  | 5.5608  | 5.5527  | 2.0830                | 1.56E-05      |
| Glycine--tRNA ligase                                     | <i>GARS</i>      | -1.9288 | -0.3239 | -0.6221 | 1.6050                | 3.31E-05      |
| Rab GDP dissociation inhibitor alpha                     | <i>GDI1</i>      | -1.1212 | 0.6636  | 0.6986  | 1.7849                | 1.59E-04      |
| Glutamine synthetase                                     | <i>GLUL</i>      | -1.2067 | 1.8061  | 2.0885  | 3.0128                | 4.64E-06      |
| Aspartate aminotransferase, mitochondrial                | <i>GOT2</i>      | -1.1021 | 1.9629  | 2.6586  | 3.0650                | 1.24E-06      |
| Glycerol-3-phosphate dehydrogenase [NAD(+)], cytoplasmic | <i>GPD1</i>      | 4.2765  | -3.6608 | -3.2919 | -7.9373               | 2.36E-05      |
| Glycerol-3-phosphate dehydrogenase, mitochondrial        | <i>GPD2</i>      | -1.4381 | 0.0917  | 0.6423  | 1.5298                | 7.14E-07      |
| Glutathione peroxidase                                   | <i>GPX3</i>      | 0.3461  | -1.4208 | -1.4885 | -1.7669               | 8.68E-07      |
| Histone H1.0                                             | <i>H1FO</i>      | -2.2492 | -0.0541 | -2.0838 | 2.1950                | 5.98E-05      |
| Core histone macro-H2A.1                                 | <i>H2AFY</i>     | 0.7714  | 2.6676  | 2.9392  | 1.8961                | 6.84E-06      |
| Hydroxyacyl-coenzyme A dehydrogenase, mitochondrial      | <i>HADH</i>      | 1.5491  | -0.7814 | -0.8059 | -2.3306               | 2.56E-07      |
| Hemoglobin subunit delta                                 | <i>HBD</i>       | 4.0726  | 0.6782  | 0.4969  | -3.3944               | 4.39E-07      |
| Vigilin                                                  | <i>HDLBP</i>     | -0.5045 | 1.1435  | 1.2119  | 1.6480                | 1.68E-06      |
| Histone H1.4                                             | <i>HIST1H1E</i>  | 1.3525  | 3.1284  | 2.7652  | 1.7759                | 2.69E-05      |
| Heterogeneous nuclear ribonucleoproteins A2/B1           | <i>HNRNPA2B1</i> | 1.7605  | 3.6290  | 4.0310  | 1.8684                | 2.21E-06      |
| Heterogeneous nuclear ribonucleoprotein A/B              | <i>HNRNPAB</i>   | -2.0178 | -0.0618 | 0.6043  | 1.9560                | 7.64E-07      |
| Heterogeneous nuclear ribonucleoprotein D0               | <i>HNRNPD</i>    | -0.4755 | 1.1953  | 1.6322  | 1.6709                | 6.21E-06      |
| Heterogeneous nuclear ribonucleoprotein K                | <i>HNRNPK</i>    | 1.2137  | 2.7245  | 3.1825  | 1.5108                | 8.03E-09      |
| Heterogeneous nuclear ribonucleoprotein L                | <i>HNRNPL</i>    | -2.2217 | -0.0321 | 0.6497  | 2.1896                | 9.81E-03      |
| Heterogeneous nuclear ribonucleoprotein M                | <i>HNRNPM</i>    | -0.0239 | 1.7429  | 2.1221  | 1.7668                | 3.55E-07      |
| Heterogeneous nuclear ribonucleoprotein R                | <i>HNRNPR</i>    | -1.0986 | 0.7117  | 0.9358  | 1.8102                | 6.04E-08      |
| Heterogeneous nuclear ribonucleoprotein U                | <i>HNRNPU</i>    | 0.9576  | 2.5463  | 2.7393  | 1.5887                | 1.34E-05      |
| Haptoglobin                                              | <i>HP</i>        | 2.5337  | 0.5639  | -0.3585 | -1.9698               | 6.22E-05      |

| Protein Name                                                                                    | Gene Symbol      | MNT Lfq | MPT Lfq | MLN Lfq | MPT x MNT fold change | ANOVA p-value |
|-------------------------------------------------------------------------------------------------|------------------|---------|---------|---------|-----------------------|---------------|
| Histidine-rich glycoprotein                                                                     | <i>HRG</i>       | 2.2502  | 0.6469  | 0.0558  | -1.6033               | 1.39E-07      |
| Heat shock protein HSP 90-alpha                                                                 | <i>HSP90AA1</i>  | 3.2094  | 5.3977  | 6.1426  | 2.1883                | 3.26E-06      |
| Heat shock protein HSP 90-beta                                                                  | <i>HSP90AB1</i>  | 2.2352  | 4.4685  | 5.1209  | 2.2333                | 2.57E-07      |
| Heat shock 70 kDa protein 12A                                                                   | <i>HSPA12A</i>   | 0.3873  | -3.8718 | -3.9580 | -4.2591               | 5.67E-05      |
| 78 kDa glucose-regulated protein                                                                | <i>HSPA5</i>     | 2.5182  | 4.1380  | 4.8827  | 1.6198                | 1.80E-08      |
| Heat shock cognate 71 kDa protein                                                               | <i>HSPA8</i>     | 3.5477  | 5.2105  | 5.7345  | 1.6628                | 3.01E-07      |
| Stress-70 protein, mitochondrial                                                                | <i>HSPA9</i>     | 1.3598  | 3.5990  | 4.4452  | 2.2392                | 3.73E-08      |
| Heat shock protein beta-1                                                                       | <i>HSPB1</i>     | 2.9881  | 4.6570  | 5.1939  | 1.6689                | 2.16E-06      |
| 60 kDa heat shock protein, mitochondrial                                                        | <i>HSPD1</i>     | 2.2468  | 4.3677  | 5.0749  | 2.1209                | 4.36E-07      |
| Basement membrane-specific heparan sulfate proteoglycan core protein                            | <i>HSPG2</i>     | 3.9165  | 1.4272  | 0.4487  | -2.4893               | 2.95E-07      |
| Heat shock protein 105 kDa                                                                      | <i>HSPH1</i>     | -2.6217 | 0.4290  | 0.7817  | 3.0507                | 1.14E-06      |
| Hypoxia up-regulated protein 1                                                                  | <i>HYOU1</i>     | -1.1388 | 0.4269  | 0.3379  | 1.5657                | 6.12E-05      |
| Insulin-like growth factor-binding protein complex acid labile subunit                          | <i>IGFALS</i>    | -1.8546 | -3.4785 | -4.2654 | -1.6240               | 5.87E-05      |
| Ig heavy chain V-III region JON;Ig heavy chain V-III region WEA;Ig heavy chain V-III region TRO | <i>IGHV3-21</i>  | 0.8715  | -1.1872 | 0.3057  | -2.0587               | 9.84E-05      |
| Ig kappa chain V-III region B6                                                                  | <i>IGKV3D-20</i> | 2.3964  | 0.8633  | 0.7732  | -1.5330               | 6.33E-05      |
| Interleukin enhancer-binding factor 2                                                           | <i>ILF2</i>      | -0.0556 | 1.6223  | 1.7105  | 1.6779                | 6.24E-05      |
| Interleukin enhancer-binding factor 3                                                           | <i>ILF3</i>      | -0.7598 | 0.8074  | 0.9704  | 1.5672                | 4.65E-05      |
| Integrin-linked protein kinase                                                                  | <i>ILK</i>       | -0.5639 | -2.4023 | -3.1419 | -1.8384               | 7.20E-06      |
| Inter-alpha-trypsin inhibitor heavy chain H4                                                    | <i>ITIH4</i>     | 2.3430  | 0.7080  | -0.1934 | -1.6350               | 7.94E-07      |
| KH domain-containing, RNA-binding, signal transduction-associated protein 1                     | <i>KHDRBS1</i>   | -2.9218 | -1.3215 | -0.9233 | 1.6003                | 1.64E-03      |
| Kininogen-1                                                                                     | <i>KNG1</i>      | 2.2146  | 0.5840  | -0.3921 | -1.6305               | 2.87E-07      |
| Keratin, type I cytoskeletal 18                                                                 | <i>KRT18</i>     | -1.9253 | 2.4561  | 2.8070  | 4.3813                | 7.92E-06      |
| Kinectin                                                                                        | <i>KTN1</i>      | -1.8219 | -0.1174 | -0.4225 | 1.7045                | 1.84E-05      |
| Laminin subunit gamma-1                                                                         | <i>LAMC1</i>     | 2.8354  | -0.4616 | -1.9305 | -3.2971               | 8.64E-06      |

| Protein Name                                              | Gene Symbol   | MNT Lfq | MPT Lfq | MLN Lfq | MPT x MNT fold change | ANOVA p-value |
|-----------------------------------------------------------|---------------|---------|---------|---------|-----------------------|---------------|
| Lipopolysaccharide-binding protein                        | <i>LBP</i>    | -2.1570 | -3.8189 | -4.1528 | -1.6619               | 1.28E-04      |
| L-lactate dehydrogenase B chain                           | <i>LDHB</i>   | 3.1512  | 1.6243  | 2.0426  | -1.5269               | 7.66E-05      |
| Vesicular integral-membrane protein VIP36                 | <i>LMAN2</i>  | -2.4150 | -0.7556 | -0.7202 | 1.6593                | 4.38E-04      |
| Lamin-B1                                                  | <i>LMNB1</i>  | -1.0286 | 0.7844  | 0.9896  | 1.8130                | 6.51E-05      |
| Leucine-rich alpha-2-glycoprotein                         | <i>LRG1</i>   | -0.4564 | -2.7778 | -3.7323 | -2.3214               | 4.42E-04      |
| Prolow-density lipoprotein receptor-related protein 1     | <i>LRP1</i>   | -0.9453 | -2.5693 | -3.5181 | -1.6239               | 6.13E-05      |
| Leucine-rich PPR motif-containing protein, mitochondrial  | <i>LRPPRC</i> | 0.3761  | 1.8887  | 2.5998  | 1.5126                | 1.87E-10      |
| Leucine-rich repeat-containing protein 59                 | <i>LRRC59</i> | -1.9319 | 1.2951  | 1.4037  | 3.2270                | 6.57E-08      |
| Lactotransferrin                                          | <i>LTF</i>    | 2.3578  | -3.6759 | -5.4587 | -6.0336               | 3.20E-07      |
| Amine oxidase [flavin-containing] A                       | <i>MAOA</i>   | 1.9006  | -3.1677 | -3.0711 | -5.0683               | 1.85E-07      |
| Cell surface glycoprotein MUC18                           | <i>MCAM</i>   | 1.8194  | -3.9521 | -4.5274 | -5.7715               | 3.32E-06      |
| Methylcrotonoyl-CoA carboxylase beta chain, mitochondrial | <i>MCCC2</i>  | -1.4150 | 0.4662  | -1.1181 | 1.8812                | 2.71E-05      |
| Malate dehydrogenase, mitochondrial                       | <i>MDH2</i>   | 2.1562  | 3.7563  | 3.7478  | 1.6001                | 5.20E-06      |
| NADP-dependent malic enzyme                               | <i>ME1</i>    | -0.2062 | -1.7249 | -1.9242 | -1.5187               | 1.01E-05      |
| C-1-tetrahydrofolate synthase                             | <i>MTHFD1</i> | 1.2189  | -0.5599 | -0.1058 | -1.7789               | 4.45E-06      |
| Myosin-11                                                 | <i>MYH11</i>  | 3.4640  | 1.9041  | -0.0918 | -1.5598               | 1.29E-07      |
| Myosin-9                                                  | <i>MYH9</i>   | 3.9996  | 5.8962  | 5.5984  | 1.8966                | 4.16E-07      |
| Unconventional myosin-Ic                                  | <i>MYO1C</i>  | 3.3706  | 1.2130  | 0.8485  | -2.1576               | 3.90E-08      |
| Nidogen-2                                                 | <i>NID2</i>   | 2.3346  | -1.9316 | -2.7235 | -4.2663               | 1.17E-06      |
| Nicotinamide N-methyltransferase                          | <i>NNMT</i>   | -2.0795 | 0.0543  | -1.6304 | 2.1338                | 1.50E-04      |
| NAD(P) transhydrogenase, mitochondrial                    | <i>NNT</i>    | -0.1145 | -1.8029 | -1.0699 | -1.6884               | 4.51E-04      |
| Non-POU domain-containing octamer-binding protein         | <i>NONO</i>   | -1.3830 | 0.3358  | 0.3498  | 1.7188                | 8.54E-06      |
| Nucleophosmin                                             | <i>NPM1</i>   | -1.1842 | 1.0085  | 1.3060  | 2.1928                | 4.53E-06      |
| Vesicle-fusing ATPase                                     | <i>NSF</i>    | -0.9276 | 0.7123  | 0.5402  | 1.6399                | 1.11E-04      |

| Protein Name                                                                   | Gene Symbol    | MNT Lfq | MPT Lfq | MLN Lfq | MPT x MNT fold change | ANOVA p-value |
|--------------------------------------------------------------------------------|----------------|---------|---------|---------|-----------------------|---------------|
| Nuclear mitotic apparatus protein 1                                            | <i>NUMA1</i>   | -1.4829 | 0.1777  | 0.5041  | 1.6606                | 5.85E-06      |
| Mimecan                                                                        | <i>OGN</i>     | 5.0148  | 2.9127  | 0.7526  | -2.1022               | 1.43E-06      |
| Alpha-1-acid glycoprotein 1                                                    | <i>ORM1</i>    | 3.2234  | 1.1875  | 0.8735  | -2.0358               | 1.46E-04      |
| Protein disulfide-isomerase                                                    | <i>P4HB</i>    | 2.3651  | 4.0196  | 4.0523  | 1.6545                | 1.59E-06      |
| Poly [ADP-ribose] polymerase 1                                                 | <i>PARP1</i>   | -0.3357 | 2.1042  | 2.6797  | 2.4399                | 6.65E-06      |
| Alpha-parvin                                                                   | <i>PARVA</i>   | 0.8488  | -1.3354 | -1.7643 | -2.1842               | 9.40E-07      |
| Poly(rC)-binding protein 1                                                     | <i>PCBP1</i>   | -0.6968 | 0.8153  | 0.9208  | 1.5121                | 2.25E-06      |
| Preylcysteine oxidase 1                                                        | <i>PCYOX1</i>  | 1.7375  | 0.1072  | -0.6672 | -1.6304               | 7.10E-07      |
| Pyruvate dehydrogenase E1 component subunit alpha, somatic form, mitochondrial | <i>PDHA1</i>   | -0.2887 | -2.3811 | -2.1680 | -2.0924               | 9.57E-06      |
| Protein disulfide-isomerase A3                                                 | <i>PDIA3</i>   | 2.2440  | 4.0449  | 3.6608  | 1.8008                | 5.01E-06      |
| Phosphoglucomutase-1                                                           | <i>PGM1</i>    | 1.7556  | 0.1862  | 0.0038  | -1.5695               | 7.01E-05      |
| Prohibitin                                                                     | <i>PHB</i>     | 1.2827  | 2.8465  | 3.0430  | 1.5638                | 9.47E-07      |
| D-3-phosphoglycerate dehydrogenase                                             | <i>PHGDH</i>   | 1.9678  | -0.8964 | -1.5676 | -2.8642               | 7.46E-08      |
| Pyruvate kinase PKM                                                            | <i>PKM</i>     | 2.9453  | 5.0940  | 4.9225  | 2.1487                | 1.63E-07      |
| Plasminogen                                                                    | <i>PLG</i>     | 1.9108  | -0.4885 | -1.9213 | -2.3993               | 3.06E-05      |
| Perilipin-1                                                                    | <i>PLIN1</i>   | 4.4659  | -2.8982 | -2.4433 | -7.3640               | 1.49E-10      |
| Perilipin-4                                                                    | <i>PLIN4</i>   | 3.6374  | -5.2592 | -5.7818 | -8.8965               | 1.50E-07      |
| Serum paraoxonase/arylesterase 1                                               | <i>PON1</i>    | 0.6889  | -1.6059 | -3.2990 | -2.2948               | 1.87E-07      |
| Periostin                                                                      | <i>POSTN</i>   | 2.6870  | 6.3962  | 6.6599  | 3.7092                | 1.29E-08      |
| Peroxiredoxin-1                                                                | <i>PRDX1</i>   | 2.6855  | 4.1870  | 4.4239  | 1.5015                | 9.18E-07      |
| Peroxiredoxin-2                                                                | <i>PRDX2</i>   | 3.9749  | 2.1224  | 2.2232  | -1.8525               | 3.80E-06      |
| Prolargin                                                                      | <i>PRELP</i>   | 4.8785  | 3.2139  | 3.8117  | -1.6646               | 1.15E-05      |
| cAMP-dependent protein kinase type II-alpha regulatory subunit                 | <i>PRKAR2A</i> | 2.1199  | -0.1883 | -0.5626 | -2.3082               | 1.65E-02      |
| cAMP-dependent protein kinase type II-beta regulatory subunit                  | <i>PRKAR2B</i> | 0.8785  | -1.4201 | -1.0323 | -2.2986               | 9.31E-07      |



| Protein Name                                   | Gene Symbol     | MNT Lfq | MPT Lfq | MLN Lfq | MPT x MNT fold change | ANOVA p-value |
|------------------------------------------------|-----------------|---------|---------|---------|-----------------------|---------------|
| Protein kinase C delta-binding protein         | <i>PRKCDBP</i>  | 0.4444  | -1.5609 | -2.9268 | -2.0053               | 8.29E-03      |
| DNA-dependent protein kinase catalytic subunit | <i>PRKDC</i>    | -0.1922 | 1.5011  | 1.9272  | 1.6933                | 1.03E-04      |
| Pre-mRNA-processing-splicing factor 8          | <i>PRPF8</i>    | -1.8677 | -0.2932 | -0.2698 | 1.5745                | 3.78E-06      |
| Proteasome activator complex subunit 1         | <i>PSME1</i>    | 0.4624  | 2.3759  | 2.9383  | 1.9134                | 3.27E-07      |
| Proteasome activator complex subunit 2         | <i>PSME2</i>    | -0.9478 | 0.7647  | 1.1228  | 1.7125                | 4.25E-05      |
| Polypyrimidine tract-binding protein 1         | <i>PTBP1</i>    | -0.8922 | 1.3677  | 1.6058  | 2.2599                | 2.40E-07      |
| Prostacyclin synthase                          | <i>PTGIS</i>    | -0.6168 | -4.2204 | -3.8418 | -3.6036               | 1.48E-08      |
| Polymerase I and transcript release factor     | <i>PTRF</i>     | 3.8445  | 0.8655  | 0.3079  | -2.9790               | 2.45E-07      |
| RNA-binding motif protein, X chromosome        | <i>RBMX</i>     | -1.5038 | 0.2185  | 0.1336  | 1.7223                | 1.68E-04      |
| Retinol-binding protein 4                      | <i>RBP4</i>     | -1.8033 | -4.7505 | -5.3913 | -2.9472               | 7.58E-04      |
| All-trans-retinol 13,14-reductase              | <i>RETSAT</i>   | -0.0800 | -3.0121 | -3.2020 | -2.9321               | 1.44E-05      |
| Aminopeptidase B                               | <i>RNPEP</i>    | -1.4811 | 0.5614  | 1.6734  | 2.0426                | 3.98E-05      |
| 60S ribosomal protein L13                      | <i>RPL13</i>    | -1.6845 | -0.0528 | 0.7723  | 1.6317                | 2.54E-05      |
| 60S ribosomal protein L18                      | <i>RPL18</i>    | -1.7992 | 0.6932  | 1.0535  | 2.4924                | 5.01E-05      |
| 60S ribosomal protein L3                       | <i>RPL3</i>     | -1.3728 | 0.5731  | -0.2382 | 1.9459                | 2.98E-06      |
| 60S ribosomal protein L4                       | <i>RPL4</i>     | -0.7083 | 1.9934  | 2.0225  | 2.7017                | 2.82E-07      |
| 60S ribosomal protein L6                       | <i>RPL6</i>     | -2.1260 | 1.2614  | 0.6111  | 3.3874                | 8.39E-06      |
| 60S ribosomal protein L7a                      | <i>RPL7A</i>    | -0.7041 | 1.2934  | 0.8960  | 1.9975                | 2.36E-02      |
| 40S ribosomal protein S9                       | <i>RPS9</i>     | 0.1508  | 1.8094  | 1.9852  | 1.6586                | 5.55E-06      |
| Ribosome-binding protein 1                     | <i>RRBP1</i>    | -1.5699 | 0.3034  | 1.2376  | 1.8733                | 1.41E-04      |
| tRNA-splicing ligase RtcB homolog              | <i>RTCB</i>     | -1.2926 | 0.2525  | 0.5822  | 1.5451                | 1.29E-03      |
| RuvB-like 2                                    | <i>RUVBL2</i>   | -1.7026 | 0.4851  | 0.9080  | 2.1877                | 4.56E-06      |
| Selenium-binding protein 1                     | <i>SELENBP1</i> | 3.0459  | 1.1404  | 0.8430  | -1.9055               | 1.28E-09      |
| Heparin cofactor 2                             | <i>SERPIND1</i> | 1.7438  | -0.8025 | -1.5065 | -2.5463               | 5.39E-08      |

| Protein Name                                                  | Gene Symbol     | MNT Lfq | MPT Lfq | MLN Lfq | MPT x MNT fold change | ANOVA p-value |
|---------------------------------------------------------------|-----------------|---------|---------|---------|-----------------------|---------------|
| Alpha-2-antiplasmin                                           | <i>SERPINF2</i> | 0.4205  | -2.2801 | -2.6577 | -2.7006               | 1.11E-03      |
| SH3 domain-binding glutamic acid-rich-like protein            | <i>SH3BGRL</i>  | -0.6334 | 0.9192  | 0.8442  | 1.5526                | 2.74E-06      |
| Tricarboxylate transport protein, mitochondrial               | <i>SLC25A1</i>  | 0.9369  | -0.7725 | -0.8359 | -1.7094               | 3.68E-05      |
| Band 3 anion transport protein                                | <i>SLC4A1</i>   | 3.5527  | -1.7120 | -3.0736 | -5.2647               | 5.09E-07      |
| Na(+)/H(+) exchange regulatory cofactor NHE-RF1               | <i>SLC9A3R1</i> | -2.8018 | 0.4771  | 1.0017  | 3.2788                | 8.36E-06      |
| U5 small nuclear ribonucleoprotein 200 kDa helicase           | <i>SNRNP200</i> | -2.3850 | -0.4099 | -0.0059 | 1.9751                | 1.57E-04      |
| Sorbin and SH3 domain-containing protein 1                    | <i>SORBS1</i>   | 1.1217  | -3.3356 | -4.0979 | -4.4572               | 9.33E-06      |
| Sorbitol dehydrogenase                                        | <i>SORD</i>     | -1.4568 | 2.1199  | 1.3943  | 3.5766                | 2.76E-07      |
| Spectrin beta chain, non-erythrocytic 1                       | <i>SPTBN1</i>   | 2.9910  | 1.4154  | 1.4726  | -1.5756               | 1.72E-06      |
| Serine/arginine-rich splicing factor 2                        | <i>SRSF2</i>    | -2.0185 | -0.2075 | -0.3944 | 1.8110                | 3.80E-04      |
| Serine/arginine-rich splicing factor 3                        | <i>SRSF3</i>    | -1.9598 | 0.1341  | 0.3935  | 2.0939                | 3.90E-05      |
| Serine/arginine-rich splicing factor 6                        | <i>SRSF6</i>    | -1.7539 | -0.2338 | 0.0059  | 1.5201                | 1.43E-02      |
| Serine/arginine-rich splicing factor 7                        | <i>SRSF7</i>    | -1.9797 | -0.4400 | -0.2969 | 1.5397                | 1.43E-03      |
| Signal transducer and activator of transcription 1-alpha/beta | <i>STAT1</i>    | -1.6160 | 1.9952  | 2.7418  | 3.6113                | 1.49E-06      |
| Heterogeneous nuclear ribonucleoprotein Q                     | <i>SYNCRIP</i>  | 0.0641  | 1.8336  | 2.2367  | 1.7695                | 1.16E-06      |
| Thrombospondin-1                                              | <i>THBS1</i>    | 0.7646  | 3.1334  | 2.2863  | 2.3688                | 3.12E-07      |
| Tenascin                                                      | <i>TNC</i>      | 0.5871  | 2.5731  | 0.8763  | 1.9860                | 3.48E-07      |
| Tensin-1                                                      | <i>TNS1</i>     | 1.5678  | -1.8431 | -2.3624 | -3.4109               | 4.31E-08      |
| Tenascin-X                                                    | <i>TNXB</i>     | 1.3189  | -3.6676 | -4.6270 | -4.9865               | 8.76E-07      |
| Heat shock protein 75 kDa, mitochondrial                      | <i>TRAP1</i>    | -2.5908 | -0.9483 | -0.5966 | 1.6426                | 3.99E-02      |
| Tubulin--tyrosine ligase-like protein 12                      | <i>TTL12</i>    | -1.1334 | 1.1320  | 2.8059  | 2.2654                | 5.08E-09      |
| Tubulin beta chain                                            | <i>TUBB</i>     | 2.1900  | 3.8437  | 4.1848  | 1.6537                | 3.64E-05      |
| Tubulin beta-4B chain                                         | <i>TUBB4B</i>   | 3.5757  | 5.2204  | 5.4828  | 1.6447                | 3.52E-06      |
| Thymidine phosphorylase                                       | <i>TYMP</i>     | -1.3742 | 1.9053  | 1.9692  | 3.2796                | 5.10E-05      |

| <b>Protein Name</b>                          | <b>Gene Symbol</b> | <b>MNT<br/>LFQ</b> | <b>MPT<br/>LFQ</b> | <b>MLN<br/>LFQ</b> | <b>MPT x<br/>MNT<br/>fold change</b> | <b>ANOVA<br/>p-value</b> |
|----------------------------------------------|--------------------|--------------------|--------------------|--------------------|--------------------------------------|--------------------------|
| Splicing factor U2AF 65 kDa subunit          | <i>U2AF2</i>       | -2.9283            | -0.2138            | -0.2659            | 2.7145                               | 4.00E-04                 |
| UDP-glucose 6-dehydrogenase                  | <i>UGDH</i>        | -0.2996            | 1.5473             | 1.7181             | 1.8469                               | 6.22E-05                 |
| UTP--glucose-1-phosphate uridylyltransferase | <i>UGP2</i>        | 2.4714             | 0.8641             | 0.7377             | -1.6073                              | 1.08E-07                 |
| Valine-tRNA ligase                           | <i>VAR5</i>        | -1.6652            | 0.1034             | 1.1202             | 1.7686                               | 1.90E-05                 |

**B.**

| <b>Upstream regulator</b> | <b>Molecule type</b>            | <b>z-score</b> | <b>p-value</b> | <b>Target molecules in dataset</b>                                                                                                                                                                                                               |
|---------------------------|---------------------------------|----------------|----------------|--------------------------------------------------------------------------------------------------------------------------------------------------------------------------------------------------------------------------------------------------|
| 5-fluorouracil            | Chemical drug                   | -3.4           | 1.36E-13       | <i>ALDOA, ECHS1, FBL, GAPDH, GARS, GOT2, HNRNPA2B1, HNRNPAB, HSP90AB1, HSPA8, ILF2, NNT, PCBP1, PKM, PSME1, PSME2, RBMX, RPL18, RPL6, RPL7A, SRSF2, THBS1</i>                                                                                    |
| Dexamethasone             | Chemical drug                   | -3.619         | 1.80E-09       | <i>ACSL1, AGT, ALDH1A1, AP1G1, APOD, ASPH, C5, CAT, CAV1, CES1, CRABP2, CRYAB, CTSD, EZR, FABP4, FGG, FKBP4, FNI, GAPDH, GLUL, HNRNPAB, HSPA5, ILF2, ILF3, LBP, LRP1, MAOA, ME1, ORM1, POSTN, RBP4, SLC25A1, SPTBN1, STAT1, THBS1, TNC, VARS</i> |
| MYC                       | Transcription regulator         | 3.133          | 1.35E-08       | <i>ASS1, CAV1, CSE1L, EZR, FASN, FBL, FMOD, FNI, GAPDH, HNRNPU, HSP90AA1, HSPA9, HSPB1, HSPD1, HSPH1, MTHFD1, NPM1, PHB, PKM, RPL6, RUVBL2, TRAP1</i>                                                                                            |
| Phytohemagglutinin        | Chemical drug                   | -2.5           | 7.20E-08       | <i>ADH5, AGT, AHSG, ALDH2, C5, CAT, COL18A1, FBNI, GPD1, GPD2, HSP90AA1, ITIH4, LBP, MAOA, PCYOX1, SLC4A1, STAT1</i>                                                                                                                             |
| Sirolimus                 | Chemical drug                   | -3.153         | 2.14E-07       | <i>ACADM, ASS1, FASN, FNI, HNRNPU, HSP90AA1, HSP90AB1, HSPD1, LDHB, MYH11, NPM1, PKM, PLIN1, RPL18, RPL3, RPL7A, RPS9, SRSF3, STAT1</i>                                                                                                          |
| CEBPB                     | Transcription regulator         | -2.779         | 2.74E-06       | <i>AGT, ALDH1A1, APOB, FABP4, HP, HSPD1, KRT18, LBP, ORM1, PLG, PRKAR2B</i>                                                                                                                                                                      |
| Tretinoin                 | Chemical - endogenous mammalian | -2.012         | 3.68E-06       | <i>ACSL1, ALDH1A1, APOD, APOE, CA2, CD36, CES1, CRABP2, CSE1L, DHX15, DSP, EEF1D, FNI, GARS, HNRNPD, HNRNPK, HSPB1, HSPD1, ILF3, KRT18, LTF, MYH9, NID2, NPM1, POSTN, PRDX2, PTGIS, RPL6, RUVBL2, STAT1, THBS1, TNC</i>                          |
| CD3                       | Complex                         | -3.729         | 8.45E-05       | <i>ACADS, FBL, GAPDH, H2AFY, HNRNPA2B1, HNRNPR, HSP90AA1, HSPA8, ILF2, MDH2, NPM1, OGN, PCYOX1, PHB, RPL6, SRSF7, STAT1, THBS1</i>                                                                                                               |
| Methotrexate              | Chemical drug                   | -2.158         | 1.18E-04       | <i>ACAA2, ACACB, ACADM, C5, CFH, ECHS1, LBP, LRP1, THBS1</i>                                                                                                                                                                                     |
| CD 437                    | Chemical drug                   | -3.162         | 1.39E-04       | <i>ALDOA, HSP90AA1, HSPA8, ILF2, NPM1, PCBP1, PDIA3, RBMX, RPL13, SRSF3</i>                                                                                                                                                                      |
| IFNG                      | Cytokine                        | 2.959          | 3.17E-04       | <i>AGT, ASS1, CAT, CD36, CSE1L, CTSD, DDX5, FAH, FASN, FNI, HSP90AB1, HSPA8, HSPG2, PHGDH, PRDX2, PRPF8, PSME1, PSME2, STAT1, THBS1, TYMP</i>                                                                                                    |

| <b>Upstream regulator</b> | <b>Molecule type</b>    | <b>z-score</b> | <b>p-value</b> | <b>Target molecules in dataset</b>                                      |
|---------------------------|-------------------------|----------------|----------------|-------------------------------------------------------------------------|
| AR                        | Nuclear receptor        | 2.213          | 6.32E-04       | <i>CAVI, CKAP4, FKBP4, GDI1, HSPA5, HSPH1, MAOA, SORD, STAT1, THBS1</i> |
| PI3K (family)             | Group                   | 2.433          | 9.56E-04       | <i>CAT, CTSD, FASN, HSPA5, PKM, TNC</i>                                 |
| PDGF BB                   | Complex                 | 2.184          | 4.80E-03       | <i>CNN1, FASN, MYH11, RPL13, SRSF7, THBS1, TNC</i>                      |
| CD28                      | Transmembrane receptor  | -2.985         | 5.21E-03       | <i>FBL, GAPDH, H2AFY, HSPA8, ILF2, PCYOX1, PHB, RPL6, THBS1</i>         |
| SMARCA4                   | Transcription regulator | -2             | 7.27E-02       | <i>AGR2, AGT, ALDH2, CALB2, FGG, FNI, GAPDH, KRT18, PARVA, TUBB</i>     |
