# Supplementary material for: Integrated analysis of label-free quantitative proteomics and bioinformatics reveal insights into signaling pathways in male breast cancer
Source: PubMed Central journal article supplement (PMC7926483; doi:10.1590/1678-4685-gmb-2019-0410), 2021-03-01
Supplement: 1415-4757-GMB-44-1-e20190410-suppl4.pdf [file 1415-4757-GMB-44-1-e20190410-suppl4.pdf]

## Supplementary Material to “Integrated analysis of label-free quantitative proteomics and bioinformatics reveal insights into signaling pathways in male breast cancer”

**Table S4 - A.** Differentially expressed proteins into the log<sub>2</sub> fold change values identified for MPT x MLN tissues' comparison according to the ANOVA's test. LFQ intensities were log<sub>2</sub>-transformed and normalized by width adjustment in Perseus v. 1.5.6.0. Fold changes were presented in log<sub>2</sub> values. **B.** Main upstream regulators analysis of the differentially expressed proteins identified in the MPT x MLN tissues' comparison. (IPA analysis). The ANOVA and IPA p-values were adjusted by Benjamini-Hochberg FDR of 0.05.

**A.**

| Protein Name                                               | Gene Symbol    | MNT LFQ | MPT LFQ | MLN LFQ | MPT x MLN fold change | ANOVA p-value |
|------------------------------------------------------------|----------------|---------|---------|---------|-----------------------|---------------|
| Alpha-2-HS-glycoprotein                                    | <i>AHSG</i>    | 1.1837  | -1.4220 | -3.9872 | 2.5652                | 4.35E-07      |
| Asporin                                                    | <i>ASPN</i>    | 3.6409  | 2.6202  | 0.4874  | 2.1328                | 2.14E-07      |
| Carbonic anhydrase 2                                       | <i>CA2</i>     | 3.0463  | 0.4364  | 2.3018  | -1.8654               | 3.57E-07      |
| Calreticulin                                               | <i>CALR</i>    | -0.2689 | 0.1178  | 1.7525  | -1.6347               | 5.77E-05      |
| Complement factor H                                        | <i>CFH</i>     | 1.8955  | 0.2190  | -1.3321 | 1.5511                | 4.35E-06      |
| Chymase                                                    | <i>CMA1</i>    | 1.0482  | -0.2228 | -4.4853 | 4.2625                | 4.19E-05      |
| Calponin-1                                                 | <i>CNN1</i>    | 2.3538  | -0.0842 | -2.7271 | 2.6429                | 8.57E-06      |
| Collagen alpha-1(XII) chain                                | <i>COL12A1</i> | 2.2517  | 4.7556  | 3.0561  | 1.6995                | 8.88E-09      |
| Collagen alpha-1(XIV) chain                                | <i>COL14A1</i> | 3.7213  | 3.8950  | 1.7020  | 2.1930                | 2.88E-06      |
| Mast cell carboxypeptidase A                               | <i>CPA3</i>    | 1.9123  | 0.3349  | -3.2596 | 3.5946                | 2.90E-08      |
| Cathepsin G                                                | <i>CTSG</i>    | 0.7956  | -0.5105 | -3.6005 | 3.0900                | 1.15E-06      |
| Dehydrogenase/reductase SDR family member 2, mitochondrial | <i>DHRS2</i>   | -2.7286 | -1.1462 | 1.6987  | -2.8449               | 1.28E-05      |
| Fibromodulin                                               | <i>FMOD</i>    | 0.7103  | -2.1584 | -4.1646 | 2.0062                | 1.78E-05      |
| Histone H1.0                                               | <i>H1FO</i>    | -2.2492 | -0.0541 | -2.0838 | 2.0296                | 5.98E-05      |
| Lactotransferrin                                           | <i>LTF</i>     | 2.3578  | -3.6759 | -5.4587 | 1.7829                | 3.20E-07      |

| <b>Protein Name</b>                                       | <b>Gene Symbol</b> | <b>MNT<br/>LFQ</b> | <b>MPT<br/>LFQ</b> | <b>MLN<br/>LFQ</b> | <b>MPT x<br/>MLN<br/>fold change</b> | <b>ANOVA<br/>p-value</b> |
|-----------------------------------------------------------|--------------------|--------------------|--------------------|--------------------|--------------------------------------|--------------------------|
| Methylcrotonoyl-CoA carboxylase beta chain, mitochondrial | <i>MCCC2</i>       | -1.4150            | 0.4662             | -1.1181            | 1.5843                               | 2.71E-05                 |
| Myosin-11                                                 | <i>MYH11</i>       | 3.4640             | 1.9041             | -0.0918            | 1.9960                               | 1.29E-07                 |
| Nicotinamide N-methyltransferase                          | <i>NNMT</i>        | -2.0795            | 0.0543             | -1.6304            | 1.6847                               | 1.50E-04                 |
| Mimecan                                                   | <i>OGN</i>         | 5.0148             | 2.9127             | 0.7526             | 2.1600                               | 1.43E-06                 |
| Phosphatidylethanolamine-binding protein 1                | <i>PEBP1</i>       | 1.9676             | 2.0091             | 3.7814             | -1.7723                              | 1.79E-05                 |
| Purine nucleoside phosphorylase                           | <i>PNP</i>         | 1.3906             | 1.7133             | 3.3444             | -1.6311                              | 1.07E-07                 |
| Serum paraoxonase/arylesterase 1                          | <i>PON1</i>        | 0.6889             | -1.6059            | -3.2990            | 1.6931                               | 1.87E-07                 |
| Tenascin                                                  | <i>TNC</i>         | 0.5871             | 2.5731             | 0.8763             | 1.6968                               | 3.48E-07                 |
| Tubulin--tyrosine ligase-like protein 12                  | <i>TTLI2</i>       | -1.1334            | 1.1320             | 2.8059             | -1.6739                              | 5.08E-09                 |
| Thioredoxin domain-containing protein 5                   | <i>TXNDC5</i>      | -1.5932            | -0.7872            | 1.4591             | -2.2464                              | 2.88E-06                 |

**B.**

| <b>Upstream regulator</b>                     | <b>Molecule type</b>    | <b>p-value</b> | <b>Gene symbol (target DEPs)</b> |
|-----------------------------------------------|-------------------------|----------------|----------------------------------|
| IGFBP2                                        | Other                   | 1.05E-03       | <i>COL14A1, POSTN</i>            |
| miR-146a-5p (and other miRNAs w/seed GAGAACU) | Mature microRNA         | 1.48E-03       | <i>CFH, LTF</i>                  |
| MYOCD                                         | Transcription regulator | 2.22E-03       | <i>CNN1, MYH11</i>               |
| OLFM2                                         | Other                   | 3.88E-03       | <i>MYH11</i>                     |
| HEY2                                          | Transcription regulator | 3.88E-03       | <i>MYH11</i>                     |
| NKX2-3                                        | Transcription regulator | 5.17E-03       | <i>MYH11</i>                     |
| HEYL                                          | Transcription regulator | 5.17E-03       | <i>MYH11</i>                     |
| SBDS                                          | Other                   | 5.39E-03       | <i>COL14A1, TNC</i>              |
| PDGFRB                                        | Kinase                  | 6.46E-03       | <i>MYH11</i>                     |
| CPXM1                                         | Peptidase               | 7.75E-03       | <i>COL14A1</i>                   |
| HEY1                                          | Transcription regulator | 9.03E-03       | <i>MYH11</i>                     |
| MEMO1                                         | Other                   | 1.03E-02       | <i>CA2</i>                       |
| ELF4                                          | Transcription regulator | 2.05E-02       | <i>CA2</i>                       |
