# Supplementary material for: Integrated analysis of label-free quantitative proteomics and bioinformatics reveal insights into signaling pathways in male breast cancer
Source: PubMed Central journal article supplement (PMC7926483; doi:10.1590/1678-4685-gmb-2019-0410), 2021-03-01
Supplement: 1415-4757-GMB-44-1-e20190410-suppl5.pdf [file 1415-4757-GMB-44-1-e20190410-suppl5.pdf]

## Supplementary Material to “Integrated analysis of label-free quantitative proteomics and bioinformatics reveal insights into signaling pathways in male breast cancer”

**Table S5 - A.** Differentially expressed proteins identified for MPT x FPT tissues' comparison according to the ANOVA's test. LFQ intensities were log<sub>2</sub>-transformed and normalized by width adjustment in Perseus v. 1.5.6.0. Fold changes were presented in log<sub>2</sub> values. The ANOVA p-values were adjusted by Benjamini-Hochberg FDR of 0.05. **B.** Functional enrichment analysis (p>0.05) through DAVID analysis of the main up-regulated and down-regulated proteins identified in the MPT x FPT tissues' comparison.

**A.**

| Protein Name                                                        | Gene Symbol   | MPT LFQ | FPT LFQ | MPT X FPT fold change | DEPs in the MPT x MNT group' comparison* | DEPs in the MPT x MLN group' comparison* | Student's T-test p-value |
|---------------------------------------------------------------------|---------------|---------|---------|-----------------------|------------------------------------------|------------------------------------------|--------------------------|
| Alpha-2-macroglobulin                                               | <i>A2M</i>    | 5.0161  | 4.3416  | 0.6745                | -                                        | -                                        | 1.40E-04                 |
| ATP-binding cassette sub-family F member 1                          | <i>ABCF1</i>  | -2.5187 | -0.6231 | -1.8956               | -                                        | -                                        | 3.90E-04                 |
| Alpha/beta hydrolase domain-containing protein 11                   | <i>ABHD11</i> | -1.2856 | -0.0770 | -1.2086               | -                                        | -                                        | 4.84E-03                 |
| 3-ketoacyl-CoA thiolase, mitochondrial                              | <i>ACAA2</i>  | -0.3140 | 0.6086  | -0.9226               | -                                        | -                                        | 1.22E-02                 |
| Short/branched chain specific acyl-CoA dehydrogenase, mitochondrial | <i>ACADSB</i> | 0.9559  | -0.6869 | 1.6428                | 1.8968                                   | -0.2522                                  | 4.95E-03                 |
| Acetyl-CoA acetyltransferase, mitochondrial                         | <i>ACAT1</i>  | 1.5971  | 0.8435  | 0.7537                | -                                        | -                                        | 9.44E-04                 |
| ATP-citrate synthase                                                | <i>ACLY</i>   | 1.8925  | 0.8409  | 1.0516                | -                                        | -                                        | 8.34E-04                 |
| Cytoplasmic aconitate hydratase                                     | <i>ACO1</i>   | 0.2616  | 0.7040  | -0.4424               | -                                        | -                                        | 8.92E-03                 |
| Peroxisomal acyl-coenzyme A oxidase 1                               | <i>ACOX1</i>  | -1.1355 | -0.0136 | -1.1219               | -                                        | -                                        | 1.32E-03                 |
| Peroxisomal acyl-coenzyme A oxidase 3                               | <i>ACOX3</i>  | 0.3391  | -1.7828 | 2.1219                | -                                        | -                                        | 2.07E-04                 |
| Alpha-actinin-1                                                     | <i>ACTN1</i>  | 4.7825  | 4.5063  | 0.2762                | -                                        | -                                        | 1.34E-02                 |
| Alpha-adducin                                                       | <i>ADD1</i>   | -1.0680 | -1.7314 | 0.6634                | -                                        | -                                        | 1.01E-02                 |
| Alcohol dehydrogenase 1B                                            | <i>ADH1B</i>  | 1.4832  | 3.6222  | -2.1390               | -                                        | -                                        | 2.38E-05                 |
| AFG3-like protein 2                                                 | <i>AFG3L2</i> | -2.5840 | -1.5950 | -0.9890               | -                                        | -                                        | 1.59E-02                 |
| Anterior gradient protein 2 homolog                                 | <i>AGR2</i>   | 2.0072  | 0.4975  | 1.5097                | 3.2997                                   | -                                        | 7.53E-04                 |
| Neuroblast differentiation-associated                               | <i>AHNAK</i>  | 4.2724  | 5.9618  | -1.6893               | -0.3570                                  | -                                        | 2.64E-06                 |

| Protein Name                                                         | Gene Symbol    | MPT Lfq | FPT Lfq | MPT X FPT fold change | DEPs in the MPT x MNT group' comparison* | DEPs in the MPT x MLN group' comparison* | Student's T-test p-value |
|----------------------------------------------------------------------|----------------|---------|---------|-----------------------|------------------------------------------|------------------------------------------|--------------------------|
| protein AHNAK                                                        |                |         |         |                       |                                          |                                          |                          |
| Alcohol dehydrogenase [NADP(+)]                                      | <i>AKR1A1</i>  | 0.4031  | 1.7732  | -1.3701               | -                                        | -                                        | 1.27E-03                 |
| Aldehyde dehydrogenase X, mitochondrial                              | <i>ALDH1B1</i> | 0.3832  | -0.9418 | 1.3250                | -                                        | -                                        | 1.52E-02                 |
| Aldehyde dehydrogenase, mitochondrial                                | <i>ALDH2</i>   | 2.3017  | 2.7839  | -0.4822               | -                                        | -                                        | 4.92E-03                 |
| Methylmalonate-semialdehyde dehydrogenase [acylating], mitochondrial | <i>ALDH6A1</i> | -1.7514 | -0.8398 | -0.9115               | -                                        | -                                        | 1.92E-03                 |
| Alpha-amino adipic semialdehyde dehydrogenase                        | <i>ALDH7A1</i> | -0.1528 | 0.6992  | -0.8520               | -                                        | -                                        | 6.48E-03                 |
| 4-trimethylaminobutyraldehyde dehydrogenase                          | <i>ALDH9A1</i> | 2.4366  | 1.6649  | 0.7717                | -                                        | -                                        | 1.27E-04                 |
| THO complex subunit 4                                                | <i>ALYREF</i>  | -0.3014 | -0.6667 | 0.3653                | -                                        | -                                        | 8.15E-03                 |
| Aminopeptidase N                                                     | <i>ANPEP</i>   | -0.1256 | -1.2830 | 1.1574                | -                                        | -                                        | 9.37E-03                 |
| Membrane primary amine oxidase                                       | <i>AOC3</i>    | -0.7897 | 0.8172  | -1.6069               | -                                        | -                                        | 3.74E-03                 |
| AP-1 complex subunit gamma-1                                         | <i>APIG1</i>   | -0.3119 | -0.8034 | 0.4915                | -                                        | -                                        | 9.09E-03                 |
| Apoptosis inhibitor 5                                                | <i>API5</i>    | -0.5896 | 0.0004  | -0.5900               | -                                        | -                                        | 8.02E-04                 |
| Adipocyte plasma membrane-associated protein                         | <i>APMAP</i>   | 1.2874  | 1.8894  | -0.6020               | -                                        | -                                        | 1.93E-03                 |
| NAD(P)H-hydrate epimerase                                            | <i>APOA1BP</i> | -0.4482 | -0.9260 | 0.4777                | -                                        | -                                        | 1.61E-02                 |
| Apolipoprotein D                                                     | <i>APOD</i>    | -0.0080 | -1.0230 | 1.0150                | -                                        | -                                        | 1.80E-03                 |
| Adenine phosphoribosyltransferase                                    | <i>APRT</i>    | 0.4931  | -0.5676 | 1.0607                | -                                        | -                                        | 2.87E-04                 |
| Rho GDP-dissociation inhibitor 1                                     | <i>ARHGDI1</i> | 3.4667  | 2.5785  | 0.8882                | -                                        | -                                        | 2.59E-03                 |
| Rho GDP-dissociation inhibitor 2                                     | <i>ARHGDI2</i> | 1.5445  | 2.5443  | -0.9999               | -                                        | -                                        | 8.29E-04                 |
| Actin-related protein 2/3 complex subunit 3                          | <i>ARPC3</i>   | -0.3667 | 0.4675  | -0.8342               | -                                        | -                                        | 7.15E-04                 |
| Asporin                                                              | <i>ASPN</i>    | 3.4383  | 4.2753  | -0.8370               | -                                        | -                                        | 1.67E-03                 |
| Argininosuccinate synthase                                           | <i>ASS1</i>    | -3.3604 | -4.2398 | 0.8794                | -                                        | -                                        | 1.44E-02                 |
| Atlastin-3                                                           | <i>ATL3</i>    | -0.0113 | -0.2795 | 0.2682                | -                                        | -                                        | 1.55E-02                 |
| Sodium/potassium-transporting ATPase                                 | <i>ATP1A1</i>  | 0.6741  | -0.9141 | 1.5882                | 0.4076                                   | -                                        | 1.06E-03                 |

| Protein Name                                            | Gene Symbol     | MPT Lfq | FPT Lfq | MPT X FPT fold change | DEPs in the MPT x MNT group' comparison* | DEPs in the MPT x MLN group' comparison* | Student's T-test p-value |
|---------------------------------------------------------|-----------------|---------|---------|-----------------------|------------------------------------------|------------------------------------------|--------------------------|
| subunit alpha-1                                         |                 |         |         |                       |                                          |                                          |                          |
| Sarcoplasmic/endoplasmic reticulum calcium ATPase 2     | <i>ATP2A2</i>   | -0.2748 | 0.0934  | -0.3682               | -                                        | -                                        | 1.24E-02                 |
| ATP synthase subunit O, mitochondrial                   | <i>ATP5O</i>    | 1.6865  | 1.2763  | 0.4102                | -                                        | -                                        | 1.84E-02                 |
| V-type proton ATPase catalytic subunit A                | <i>ATP6V1A</i>  | 0.9713  | 0.5839  | 0.3874                | -                                        | -                                        | 1.77E-02                 |
| V-type proton ATPase subunit C 1                        | <i>ATP6V1C1</i> | -1.7687 | -1.4007 | -0.3680               | -                                        | -                                        | 1.24E-02                 |
| B-cell receptor-associated protein 31                   | <i>BCAP31</i>   | -1.1236 | -3.5070 | 2.3834                | -                                        | -                                        | 1.34E-02                 |
| Biglycan                                                | <i>BGN</i>      | 4.3799  | 6.0987  | -1.7188               | -0.5469                                  | -                                        | 6.25E-06                 |
| 3(2),5-bisphosphate nucleotidase 1                      | <i>BPNT1</i>    | 0.2579  | -0.8002 | 1.0581                | -                                        | -                                        | 1.20E-03                 |
| Basic leucine zipper and W2 domain-containing protein 2 | <i>BZW2</i>     | -2.7607 | -2.1848 | -0.5758               | -                                        | -                                        | 1.01E-02                 |
| Complement C1q subcomponent subunit B                   | <i>C1QB</i>     | -0.3905 | 0.0357  | -0.4262               | -                                        | -                                        | 1.24E-02                 |
| Complement component C8 beta chain                      | <i>C8B</i>      | -1.7498 | -0.3261 | -1.4236               | -                                        | -                                        | 8.16E-05                 |
| Carbonic anhydrase 1                                    | <i>CA1</i>      | 2.4413  | 3.0933  | -0.6520               | -                                        | -                                        | 4.92E-03                 |
| Calcyclin-binding protein                               | <i>CACYBP</i>   | 1.9023  | 0.2008  | 1.7014                | 2.3055                                   | -0.2961                                  | 7.55E-05                 |
| Caldesmon                                               | <i>CALD1</i>    | 2.1620  | 0.8959  | 1.2661                | -                                        | -                                        | 9.22E-05                 |
| Calreticulin                                            | <i>CALR</i>     | 1.2215  | 2.3227  | -1.1012               | -                                        | -                                        | 3.76E-05                 |
| Cullin-associated NEDD8-dissociated protein 1           | <i>CAND1</i>    | 3.3795  | 2.5571  | 0.8225                | -                                        | -                                        | 1.03E-04                 |
| Calnexin                                                | <i>CANX</i>     | 3.3149  | 2.6058  | 0.7091                | -                                        | -                                        | 6.58E-04                 |
| Adenylyl cyclase-associated protein 1                   | <i>CAP1</i>     | 2.1937  | 3.1861  | -0.9924               | -                                        | -                                        | 7.13E-04                 |
| Calpain-2 catalytic subunit                             | <i>CAPN2</i>    | -2.7287 | -1.9845 | -0.7442               | -                                        | -                                        | 1.77E-02                 |
| Carbonyl reductase [NADPH] 1                            | <i>CBR1</i>     | 1.0447  | 2.3642  | -1.3195               | -                                        | -                                        | 2.81E-05                 |
| T-complex protein 1 subunit eta                         | <i>CCT7</i>     | 1.5647  | 0.8969  | 0.6678                | -                                        | -                                        | 4.12E-03                 |
| T-complex protein 1 subunit theta                       | <i>CCT8</i>     | 2.2690  | 2.6367  | -0.3677               | -                                        | -                                        | 6.25E-03                 |
| Platelet glycoprotein 4                                 | <i>CD36</i>     | -2.9145 | -0.2444 | -2.6701               | -7.2565                                  | -                                        | 1.18E-02                 |
| CD44 antigen                                            | <i>CD44</i>     | 0.0490  | -0.7356 | 0.7847                | -                                        | -                                        | 1.07E-02                 |
| HLA class II histocompatibility antigen                 | <i>CD74</i>     | -1.1122 | -0.5013 | -0.6108               | -                                        | -                                        | 1.18E-02                 |

| Protein Name                                    | Gene Symbol    | MPT Lfq | FPT Lfq | MPT X FPT fold change | DEPs in the MPT x MNT group' comparison* | DEPs in the MPT x MLN group' comparison* | Student's T-test p-value |
|-------------------------------------------------|----------------|---------|---------|-----------------------|------------------------------------------|------------------------------------------|--------------------------|
| gamma chain                                     |                |         |         |                       |                                          |                                          |                          |
| Liver carboxylesterase 1                        | <i>CES1</i>    | -1.3149 | -2.9707 | 1.6558                | -3.2802                                  | 0.5293                                   | 9.54E-03                 |
| Cofilin-1                                       | <i>CFL1</i>    | 3.5838  | 4.8224  | -1.2386               | -                                        | -                                        | 8.59E-04                 |
| Cold-inducible RNA-binding protein              | <i>CIRBP</i>   | -1.4318 | 0.2266  | -1.6584               | -                                        | -                                        | 1.72E-03                 |
| Cytoskeleton-associated protein 4               | <i>CKAP4</i>   | 2.4716  | 1.4232  | 1.0483                | -                                        | -                                        | 6.92E-03                 |
| Creatine kinase B-type                          | <i>CKB</i>     | -1.2395 | 0.0712  | -1.3108               | -                                        | -                                        | 3.49E-04                 |
| Chloride intracellular channel protein 1        | <i>CLIC1</i>   | 2.5736  | 3.3415  | -0.7678               | -                                        | -                                        | 1.76E-03                 |
| Collagen alpha-1(XII) chain                     | <i>COL12A1</i> | 5.5918  | 4.5204  | 1.0714                | -                                        | -                                        | 1.25E-04                 |
| Collagen alpha-1(XIV) chain                     | <i>COL14A1</i> | 4.5810  | 4.8660  | -0.2849               | -                                        | -                                        | 1.88E-03                 |
| Collagen alpha-1(I) chain                       | <i>COL1A1</i>  | 2.4567  | 3.4756  | -1.0189               | -                                        | -                                        | 2.12E-03                 |
| Collagen alpha-1(VI) chain                      | <i>COL6A1</i>  | 5.9465  | 6.8503  | -0.9038               | -                                        | -                                        | 1.57E-03                 |
| Collagen alpha-2(VI) chain                      | <i>COL6A2</i>  | 5.0524  | 5.9200  | -0.8676               | -                                        | -                                        | 1.99E-04                 |
| Collagen alpha-3(VI) chain                      | <i>COL6A3</i>  | 7.8317  | 8.7937  | -0.9620               | -                                        | -                                        | 5.66E-04                 |
| Collagen alpha-6(VI) chain                      | <i>COL6A6</i>  | -2.9252 | -0.3331 | -2.5921               | -                                        | -                                        | 7.65E-04                 |
| Coatomer subunit beta                           | <i>COPB2</i>   | 0.9255  | 0.1337  | 0.7918                | -                                        | -                                        | 1.91E-02                 |
| Coatomer subunit epsilon                        | <i>COPE</i>    | 0.5003  | -0.2799 | 0.7803                | -                                        | -                                        | 9.98E-03                 |
| Coatomer subunit gamma-1                        | <i>COPG1</i>   | 1.3479  | 0.7284  | 0.6195                | -                                        | -                                        | 1.04E-02                 |
| Coatomer subunit zeta-1                         | <i>COPZ1</i>   | -0.5457 | -1.5883 | 1.0426                | -                                        | -                                        | 6.87E-03                 |
| Coronin-1B                                      | <i>CORO1B</i>  | -1.1713 | 0.0029  | -1.1742               | -                                        | -                                        | 1.35E-02                 |
| Cytochrome c oxidase subunit 7A2, mitochondrial | <i>COX7A2</i>  | -3.9441 | -0.5258 | -3.4183               | -                                        | -                                        | 8.16E-04                 |
| Ceruloplasmin                                   | <i>CP</i>      | 2.7502  | 2.5904  | 0.1598                | -                                        | -                                        | 1.31E-02                 |
| Mast cell carboxypeptidase A                    | <i>CPA3</i>    | 1.1203  | 1.8109  | -0.6906               | -                                        | -                                        | 2.62E-03                 |
| Copine-1                                        | <i>CPNE1</i>   | -1.0016 | 1.2576  | -2.2592               | -                                        | -                                        | 1.19E-05                 |
| Cellular retinoic acid-binding protein 2        | <i>CRABP2</i>  | 2.3338  | 1.7138  | 0.6199                | -                                        | -                                        | 3.56E-03                 |
| Cysteine-rich protein 2                         | <i>CRIP2</i>   | 0.5834  | -0.6666 | 1.2500                | -                                        | -                                        | 2.75E-04                 |
| Alpha-crystallin B chain                        | <i>CRYAB</i>   | -2.7753 | -0.6785 | -2.0967               | -5.9603                                  | -                                        | 1.82E-02                 |

| Protein Name                                                                                                     | Gene Symbol   | MPT LFQ | FPT LFQ | MPT X FPT fold change | DEPs in the MPT x MNT group' comparison* | DEPs in the MPT x MLN group' comparison* | Student's T-test p-value |
|------------------------------------------------------------------------------------------------------------------|---------------|---------|---------|-----------------------|------------------------------------------|------------------------------------------|--------------------------|
| Cystatin-B                                                                                                       | <i>CSTB</i>   | 0.7728  | 2.3550  | -1.5822               | -                                        | -                                        | 5.57E-04                 |
| Catenin beta-1                                                                                                   | <i>CTNNB1</i> | 0.0831  | -0.8898 | 0.9729                | -                                        | -                                        | 1.54E-03                 |
| Cathepsin G                                                                                                      | <i>CTSG</i>   | 0.3942  | -0.4691 | 0.8633                | -                                        | -                                        | 8.75E-03                 |
| Src substrate cortactin                                                                                          | <i>CTTN</i>   | -0.4857 | 0.2003  | -0.6861               | -                                        | -                                        | 1.23E-03                 |
| Cullin-4B                                                                                                        | <i>CUL4B</i>  | -2.7455 | -3.6434 | 0.8979                | -                                        | -                                        | 1.52E-03                 |
| Cytochrome b5                                                                                                    | <i>CYB5A</i>  | 1.8156  | -0.7702 | 2.5857                | -0.7213                                  | 0.5819                                   | 3.79E-04                 |
| NADH-cytochrome b5 reductase 1                                                                                   | <i>CYB5R1</i> | 1.6114  | -0.4381 | 2.0495                | 1.6344                                   | -0.7116                                  | 2.09E-03                 |
| Aspartate--tRNA ligase, cytoplasmic                                                                              | <i>DARS</i>   | 1.2667  | 0.4790  | 0.7877                | -                                        | -                                        | 1.59E-03                 |
| Decorin                                                                                                          | <i>DCN</i>    | 4.2853  | 5.9114  | -1.6261               | -1.2872                                  | 0.9312                                   | 2.23E-04                 |
| L-xylulose reductase                                                                                             | <i>DCXR</i>   | 1.4109  | -1.0453 | 2.4562                | -                                        | -                                        | 9.30E-04                 |
| N(G),N(G)-dimethylarginine dimethylaminohydrolase 2                                                              | <i>DDAH2</i>  | 0.0616  | 1.3349  | -1.2733               | -                                        | -                                        | 4.30E-03                 |
| Nucleolar RNA helicase 2                                                                                         | <i>DDX21</i>  | -1.8092 | -0.2328 | -1.5763               | -                                        | -                                        | 1.05E-06                 |
| Spliceosome RNA helicase DDX39B                                                                                  | <i>DDX39B</i> | 2.7164  | 3.3799  | -0.6634               | -                                        | -                                        | 1.48E-03                 |
| 2,4-dienoyl-CoA reductase, mitochondrial                                                                         | <i>DECR1</i>  | 0.7701  | 0.1629  | 0.6072                | -                                        | -                                        | 3.09E-04                 |
| Dehydrogenase/reductase SDR family member 2, mitochondrial                                                       | <i>DHRS2</i>  | 0.0103  | 2.2650  | -2.2547               | 1.5824                                   | -2.8449                                  | 2.32E-04                 |
| Dehydrogenase/reductase SDR family member 7                                                                      | <i>DHRS7</i>  | 0.0148  | -1.2321 | 1.2468                | -                                        | -                                        | 3.71E-03                 |
| Pre-mRNA-splicing factor ATP-dependent RNA helicase DHX15                                                        | <i>DHX15</i>  | 0.9471  | 1.8420  | -0.8949               | -                                        | -                                        | 2.14E-03                 |
| Dihydrolipoyllysine-residue succinyltransferase component of 2-oxoglutarate dehydrogenase complex, mitochondrial | <i>DLST</i>   | -0.1809 | 1.2664  | -1.4473               | -                                        | -                                        | 1.89E-03                 |
| Dynamin-2                                                                                                        | <i>DNM2</i>   | 0.3911  | 1.2330  | -0.8420               | -                                        | -                                        | 5.38E-03                 |
| Dihydropyrimidinase-related protein 2                                                                            | <i>DPYSL2</i> | 2.3827  | 3.1678  | -0.7851               | -                                        | -                                        | 4.85E-04                 |
| Dihydropyrimidinase-related protein 3                                                                            | <i>DPYSL3</i> | 2.7350  | 2.0078  | 0.7273                | -                                        | -                                        | 5.42E-04                 |
| Destrin                                                                                                          | <i>DSTN</i>   | 0.7585  | 0.1710  | 0.5875                | -                                        | -                                        | 9.47E-03                 |

| Protein Name                                                     | Gene Symbol    | MPT LFQ | FPT LFQ | MPT X FPT fold change | DEPs in the MPT x MNT group' comparison* | DEPs in the MPT x MLN group' comparison* | Student's T-test p-value |
|------------------------------------------------------------------|----------------|---------|---------|-----------------------|------------------------------------------|------------------------------------------|--------------------------|
| E3 ubiquitin-protein ligase DTX3L                                | <i>DTX3L</i>   | -3.6787 | -4.7596 | 1.0809                | -                                        | -                                        | 6.15E-03                 |
| Cytoplasmic dynein 1 heavy chain 1                               | <i>DYNC1H1</i> | 1.9115  | 2.5631  | -0.6516               | -                                        | -                                        | 4.54E-03                 |
| Delta(3,5)-Delta(2,4)-dienoyl-CoA isomerase, mitochondrial       | <i>ECH1</i>    | 0.0951  | 1.6037  | -1.5086               | -1.1853                                  | -                                        | 3.54E-04                 |
| Elongation factor 1-gamma                                        | <i>EEF1G</i>   | 2.7371  | 2.9948  | -0.2577               | -                                        | -                                        | 9.71E-03                 |
| Elongation factor 2                                              | <i>EEF2</i>    | 3.8856  | 4.3989  | -0.5134               | -                                        | -                                        | 1.10E-03                 |
| EF-hand domain-containing protein D1                             | <i>EFHD1</i>   | 1.0735  | -0.6262 | 1.6996                | 2.1205                                   | -0.4928                                  | 4.21E-05                 |
| EH domain-containing protein 1                                   | <i>EHD1</i>    | 0.0093  | 0.8366  | -0.8274               | -                                        | -                                        | 1.49E-03                 |
| EH domain-containing protein 2                                   | <i>EHD2</i>    | 1.7961  | 2.6708  | -0.8748               | -                                        | -                                        | 2.30E-05                 |
| Interferon-induced, double-stranded RNA-activated protein kinase | <i>EIF2AK2</i> | -0.9141 | -1.5391 | 0.6250                | -                                        | -                                        | 1.98E-02                 |
| Eukaryotic translation initiation factor 3 subunit A             | <i>EIF3A</i>   | 0.4733  | 0.9435  | -0.4702               | -                                        | -                                        | 8.97E-03                 |
| Eukaryotic translation initiation factor 3 subunit B             | <i>EIF3B</i>   | 0.2926  | 1.3951  | -1.1025               | -                                        | -                                        | 1.02E-02                 |
| Eukaryotic translation initiation factor 3 subunit G             | <i>EIF3G</i>   | -1.2738 | -0.8864 | -0.3875               | -                                        | -                                        | 1.05E-02                 |
| Eukaryotic translation initiation factor 3 subunit H             | <i>EIF3H</i>   | -1.2980 | -2.5674 | 1.2694                | -                                        | -                                        | 2.61E-05                 |
| Eukaryotic translation initiation factor 3 subunit M             | <i>EIF3M</i>   | -0.0406 | -1.3673 | 1.3266                | -                                        | -                                        | 7.06E-03                 |
| Eukaryotic initiation factor 4A-I                                | <i>EIF4A1</i>  | 3.5104  | 4.0940  | -0.5836               | -                                        | -                                        | 3.29E-03                 |
| EMILIN-1                                                         | <i>EMILIN1</i> | 0.8079  | 1.9785  | -1.1706               | -                                        | -                                        | 6.06E-04                 |
| Alpha-enolase                                                    | <i>ENO1</i>    | 4.9531  | 5.8646  | -0.9115               | -                                        | -                                        | 1.34E-04                 |
| Enolase-phosphatase E1                                           | <i>ENOPH1</i>  | -1.3233 | -0.9466 | -0.3767               | -                                        | -                                        | 6.88E-03                 |
| Endoplasmic reticulum aminopeptidase 1                           | <i>ERAP1</i>   | -1.0289 | -0.3242 | -0.7047               | -                                        | -                                        | 6.66E-03                 |
| Erlin-2                                                          | <i>ERLIN2</i>  | 0.0901  | 1.6844  | -1.5943               | -0.9866                                  | -                                        | 8.38E-04                 |
| Endoplasmic reticulum resident protein 29                        | <i>ERP29</i>   | 1.1437  | 1.8840  | -0.7404               | -                                        | -                                        | 2.03E-03                 |
| Epithelial splicing regulatory protein 1                         | <i>ESRP1</i>   | -2.0513 | -2.5133 | 0.4620                | -                                        | -                                        | 1.43E-02                 |

| Protein Name                                    | Gene Symbol   | MPT Lfq | FPT Lfq | MPT X FPT fold change | DEPs in the MPT x MNT group' comparison* | DEPs in the MPT x MLN group' comparison* | Student's T-test p-value |
|-------------------------------------------------|---------------|---------|---------|-----------------------|------------------------------------------|------------------------------------------|--------------------------|
| Ezrin                                           | <i>EZR</i>    | 0.5910  | 1.4527  | -0.8618               | -                                        | -                                        | 1.05E-02                 |
| Coagulation factor XIII A chain                 | <i>F13A1</i>  | 1.2220  | 1.8292  | -0.6072               | -                                        | -                                        | 1.70E-03                 |
| Fatty acid-binding protein, adipocyte           | <i>FABP4</i>  | -0.8351 | 2.6886  | -3.5237               | -5.8985                                  | -                                        | 3.01E-06                 |
| Fumarylacetoacetase                             | <i>FAH</i>    | -1.4730 | -2.4528 | 0.9798                | -                                        | -                                        | 1.11E-02                 |
| Acylpyruvase FAHD1, mitochondrial               | <i>FAHD1</i>  | -1.8658 | -0.8957 | -0.9700               | -                                        | -                                        | 3.55E-04                 |
| rRNA 2-O-methyltransferase fibrillar            | <i>FBL</i>    | 1.8225  | 1.2525  | 0.5700                | -                                        | -                                        | 2.36E-03                 |
| Fibulin-1                                       | <i>FBLN1</i>  | 1.6389  | 1.1659  | 0.4730                | -                                        | -                                        | 1.63E-02                 |
| Fibulin-2                                       | <i>FBLN2</i>  | 0.4642  | -0.8255 | 1.2897                | -                                        | -                                        | 8.12E-04                 |
| Fibrillin-1                                     | <i>FBN1</i>   | 1.6378  | 2.2162  | -0.5784               | -                                        | -                                        | 4.20E-04                 |
| NADPH:adrenodoxin oxidoreductase, mitochondrial | <i>FDXR</i>   | -1.2093 | -2.8484 | 1.6391                | -                                        | -                                        | 9.27E-04                 |
| Fermitin family homolog 3                       | <i>FERMT3</i> | -1.3385 | -0.5198 | -0.8187               | -                                        | -                                        | 1.41E-02                 |
| Fumarate hydratase, mitochondrial               | <i>FH</i>     | 1.6351  | 0.7240  | 0.9111                | -                                        | -                                        | 5.52E-03                 |
| Peptidyl-prolyl cis-trans isomerase FKBP3       | <i>FKBP3</i>  | -0.3816 | -1.4602 | 1.0786                | -                                        | -                                        | 1.67E-02                 |
| Filamin-B                                       | <i>FLNB</i>   | 4.0044  | 3.3944  | 0.6101                | -                                        | -                                        | 2.54E-03                 |
| Flotillin-1                                     | <i>FLOT1</i>  | -2.4609 | 0.9676  | -3.4285               | -                                        | -                                        | 4.20E-05                 |
| Flotillin-2                                     | <i>FLOT2</i>  | -1.9891 | 0.3401  | -2.3292               | -                                        | -                                        | 5.15E-04                 |
| Ferritin light chain                            | <i>FTL</i>    | 3.4154  | 2.3343  | 1.0811                | -                                        | -                                        | 8.39E-03                 |
| Glucose-6-phosphate 1-dehydrogenase             | <i>G6PD</i>   | 2.4957  | 1.9337  | 0.5620                | -                                        | -                                        | 5.99E-04                 |
| Glycine--tRNA ligase                            | <i>GARS</i>   | 0.0397  | 0.4277  | -0.3880               | -                                        | -                                        | 7.37E-03                 |
| Vitamin D-binding protein                       | <i>GC</i>     | 2.4064  | 2.7817  | -0.3754               | -                                        | -                                        | 8.84E-03                 |
| Glutamate--cysteine ligase catalytic subunit    | <i>GCLC</i>   | -2.9280 | -2.6076 | -0.3204               | -                                        | -                                        | 2.01E-02                 |
| Rab GDP dissociation inhibitor alpha            | <i>GDI1</i>   | 1.3717  | 0.1883  | 1.1834                | -                                        | -                                        | 1.62E-03                 |
| Rab GDP dissociation inhibitor beta             | <i>GDI2</i>   | 3.1020  | 3.6392  | -0.5373               | -                                        | -                                        | 9.00E-04                 |
| GTPase IMAP family member 4                     | <i>GIMAP4</i> | -2.2395 | -0.0522 | -2.1873               | -                                        | -                                        | 2.26E-03                 |
| Lactoylglutathione lyase                        | <i>GLO1</i>   | -0.5944 | 1.0580  | -1.6524               | -0.6878                                  | -0.7245                                  | 1.40E-03                 |

| Protein Name                                             | Gene Symbol   | MPT Lfq | FPT Lfq | MPT X FPT fold change | DEPs in the MPT x MNT group' comparison* | DEPs in the MPT x MLN group' comparison* | Student's T-test p-value |
|----------------------------------------------------------|---------------|---------|---------|-----------------------|------------------------------------------|------------------------------------------|--------------------------|
| Glutaredoxin-3                                           | <i>GLRX3</i>  | -1.6201 | -0.9033 | -0.7168               | -                                        | -                                        | 8.22E-03                 |
| Mannose-1-phosphate guanyltransferase beta               | <i>GMPPB</i>  | -0.9291 | -1.8160 | 0.8869                | -                                        | -                                        | 6.36E-05                 |
| Guanine nucleotide-binding protein-like 1                | <i>GNL1</i>   | -2.9649 | -1.4900 | -1.4749               | -                                        | -                                        | 6.13E-03                 |
| Vesicle transport protein GOT1B                          | <i>GOLT1B</i> | -2.3833 | -3.9432 | 1.5599                | 1.3264                                   | -                                        | 1.05E-03                 |
| Glycerol-3-phosphate dehydrogenase [NAD(+)], cytoplasmic | <i>GPD1</i>   | -1.4401 | 0.5090  | -1.9491               | -7.9373                                  | -                                        | 3.08E-03                 |
| Glycerol-3-phosphate dehydrogenase 1-like protein        | <i>GPD1L</i>  | -1.3591 | -2.1787 | 0.8196                | -                                        | -                                        | 3.37E-03                 |
| Glycerol-3-phosphate dehydrogenase, mitochondrial        | <i>GPD2</i>   | 0.7261  | -0.4451 | 1.1712                | -                                        | -                                        | 6.71E-05                 |
| Growth factor receptor-bound protein 2                   | <i>GRB2</i>   | -0.2404 | 0.6368  | -0.8772               | -                                        | -                                        | 8.53E-03                 |
| Glyoxylate reductase/hydroxypyruvate reductase           | <i>GRHPR</i>  | 0.8515  | -0.0754 | 0.9269                | -                                        | -                                        | 1.06E-03                 |
| Gelsolin                                                 | <i>GSN</i>    | 3.5548  | 3.1387  | 0.4161                | -                                        | -                                        | 1.10E-02                 |
| Glutathione S-transferase kappa 1                        | <i>GSTK1</i>  | 1.4627  | 0.8212  | 0.6415                | -                                        | -                                        | 1.57E-03                 |
| Glutathione S-transferase omega-1                        | <i>GSTO1</i>  | 0.3938  | 1.0464  | -0.6527               | -                                        | -                                        | 1.17E-02                 |
| Glutathione S-transferase P                              | <i>GSTP1</i>  | 2.6552  | 3.2842  | -0.6290               | -                                        | -                                        | 2.04E-03                 |
| Histone H1x                                              | <i>H1FX</i>   | 0.5312  | 1.0121  | -0.4808               | -                                        | -                                        | 1.28E-02                 |
| Very-long-chain (3R)-3-hydroxyacyl-CoA dehydratase 3     | <i>HACD3</i>  | 0.6071  | -1.3897 | 1.9969                | 0.9497                                   | -                                        | 7.37E-05                 |
| Hydroxyacyl-coenzyme A dehydrogenase, mitochondrial      | <i>HADH</i>   | 0.0437  | 1.0027  | -0.9590               | -                                        | -                                        | 2.33E-03                 |
| Hydroxyacylglutathione hydrolase, mitochondrial          | <i>HAGH</i>   | -1.2344 | -2.1359 | 0.9015                | -                                        | -                                        | 6.61E-03                 |
| Hemoglobin subunit alpha                                 | <i>HBA1</i>   | 6.3265  | 7.8108  | -1.4843               | -                                        | -                                        | 2.11E-04                 |
| Hemoglobin subunit delta                                 | <i>HBD</i>    | 1.1664  | 3.1624  | -1.9960               | -3.3944                                  | -                                        | 1.99E-04                 |
| Vigilin                                                  | <i>HDLBP</i>  | 1.8893  | 0.7358  | 1.1534                | -                                        | -                                        | 2.77E-03                 |
| HEAT repeat-containing protein 6                         | <i>HEATR6</i> | -6.4921 | -5.2735 | -1.2186               | -                                        | -                                        | 7.01E-03                 |
| Heme-binding protein 1                                   | <i>HEBP1</i>  | 0.8179  | -1.8237 | 2.6415                | -                                        | -                                        | 9.57E-04                 |



| Protein Name                                                | Gene Symbol      | MPT LFQ | FPT LFQ | MPT X FPT fold change | DEPs in the MPT x MNT group' comparison* | DEPs in the MPT x MLN group' comparison* | Student's T-test p-value |
|-------------------------------------------------------------|------------------|---------|---------|-----------------------|------------------------------------------|------------------------------------------|--------------------------|
| Protein HID1                                                | <i>HID1</i>      | -1.4451 | -2.9985 | 1.5534                | -                                        | -                                        | 3.29E-03                 |
| Histidine triad nucleotide-binding protein 2, mitochondrial | <i>HINT2</i>     | -1.1288 | -2.0250 | 0.8962                | -                                        | -                                        | 1.75E-02                 |
| Histone H1.4                                                | <i>HIST1H1E</i>  | 3.6823  | 4.5532  | -0.8709               | -                                        | -                                        | 1.76E-03                 |
| Histone H4                                                  | <i>HIST1H4A</i>  | 6.5573  | 8.2004  | -1.6431               | 1.3973                                   | -                                        | 2.86E-04                 |
| Hexokinase-1                                                | <i>HK1</i>       | 1.8817  | 2.5936  | -0.7118               | -                                        | -                                        | 3.29E-05                 |
| HLA class II histocompatibility antigen, DR alpha chain     | <i>HLA-DRA</i>   | -0.1484 | 1.0750  | -1.2234               | -                                        | -                                        | 4.69E-03                 |
| High mobility group protein B2                              | <i>HMGB2</i>     | -1.0060 | -2.2201 | 1.2141                | -                                        | -                                        | 4.50E-03                 |
| Heterogeneous nuclear ribonucleoproteins A2/B1              | <i>HNRNPA2B1</i> | 4.3954  | 4.7191  | -0.3236               | -                                        | -                                        | 7.24E-03                 |
| Heterogeneous nuclear ribonucleoprotein A3                  | <i>HNRNPA3</i>   | 2.4569  | 3.1470  | -0.6900               | -                                        | -                                        | 1.24E-02                 |
| Heterogeneous nuclear ribonucleoprotein A/B                 | <i>HNRNPAB</i>   | 0.7106  | 1.3091  | -0.5984               | -                                        | -                                        | 5.04E-03                 |
| Heterogeneous nuclear ribonucleoprotein M                   | <i>HNRNPM</i>    | 2.5827  | 3.3492  | -0.7665               | -                                        | -                                        | 2.29E-03                 |
| Heterochromatin protein 1-binding protein 3                 | <i>HP1BP3</i>    | 0.7390  | 1.6605  | -0.9215               | -                                        | -                                        | 6.74E-03                 |
| Hemopexin                                                   | <i>HPX</i>       | 1.9109  | 4.0340  | -2.1231               | -                                        | -                                        | 9.33E-04                 |
| Histidine-rich glycoprotein                                 | <i>HRG</i>       | 1.4133  | 2.1202  | -0.7069               | -                                        | -                                        | 5.54E-04                 |
| Very-long-chain 3-oxoacyl-CoA reductase                     | <i>HSD17B12</i>  | -0.8248 | 0.0593  | -0.8840               | -                                        | -                                        | 1.73E-02                 |
| Heat shock protein HSP 90-alpha                             | <i>HSP90AA1</i>  | 4.9491  | 4.4529  | 0.4963                | -                                        | -                                        | 5.02E-04                 |
| Endoplasmic                                                 | <i>HSP90B1</i>   | 4.6255  | 4.8662  | -0.2408               | -                                        | -                                        | 3.18E-04                 |
| Heat shock-related 70 kDa protein 2                         | <i>HSPA2</i>     | -0.5653 | -2.8865 | 2.3211                | 0.5626                                   | -                                        | 2.62E-05                 |
| Heat shock 70 kDa protein 4                                 | <i>HSPA4</i>     | 0.9691  | 0.0839  | 0.8853                | -                                        | -                                        | 3.08E-03                 |
| 78 kDa glucose-regulated protein                            | <i>HSPA5</i>     | 4.8443  | 5.2348  | -0.3905               | -                                        | -                                        | 7.90E-03                 |
| Stress-70 protein, mitochondrial                            | <i>HSPA9</i>     | 4.3471  | 3.3963  | 0.9508                | -                                        | -                                        | 1.09E-03                 |
| Heat shock protein beta-1                                   | <i>HSPB1</i>     | 5.4058  | 4.0873  | 1.3186                | -                                        | -                                        | 1.23E-04                 |

| Protein Name                                                           | Gene Symbol   | MPT Lfq | FPT Lfq | MPT X FPT fold change | DEPs in the MPT x MNT group' comparison* | DEPs in the MPT x MLN group' comparison* | Student's T-test p-value |
|------------------------------------------------------------------------|---------------|---------|---------|-----------------------|------------------------------------------|------------------------------------------|--------------------------|
| 60 kDa heat shock protein, mitochondrial                               | <i>HSPD1</i>  | 5.1710  | 4.6922  | 0.4788                | -                                        | -                                        | 7.52E-03                 |
| Heat shock protein 105 kDa                                             | <i>HSPH1</i>  | 1.3000  | 0.3542  | 0.9458                | -                                        | -                                        | 1.45E-03                 |
| Hypoxia up-regulated protein 1                                         | <i>HYOU1</i>  | 1.0004  | 1.7578  | -0.7574               | -                                        | -                                        | 5.62E-04                 |
| Isoleucine--tRNA ligase, mitochondrial                                 | <i>IARS2</i>  | 1.7856  | -0.2877 | 2.0733                | 1.3510                                   | -1.1017                                  | 5.48E-04                 |
| Intercellular adhesion molecule 1                                      | <i>ICAM1</i>  | -2.7569 | -0.9822 | -1.7747               | -                                        | -                                        | 1.58E-03                 |
| Interferon-induced protein with tetratricopeptide repeats 1            | <i>IFIT1</i>  | 0.0735  | -1.5665 | 1.6400                | -                                        | -                                        | 1.04E-03                 |
| Insulin-like growth factor-binding protein complex acid labile subunit | <i>IGFALS</i> | -2.7145 | -1.8051 | -0.9094               | -                                        | -                                        | 1.75E-04                 |
| Ig gamma-4 chain C region                                              | <i>IGHG4</i>  | 2.3908  | 4.3171  | -1.9263               | -1.4879                                  | 0.8844                                   | 1.19E-03                 |
| Ig kappa chain C region                                                | <i>IGKC</i>   | 4.9988  | 5.5486  | -0.5499               | -                                        | -                                        | 1.74E-03                 |
| Interleukin enhancer-binding factor 2                                  | <i>ILF2</i>   | 2.2380  | 3.5718  | -1.3338               | -                                        | -                                        | 1.50E-03                 |
| Interleukin enhancer-binding factor 3                                  | <i>ILF3</i>   | 1.4978  | 2.7417  | -1.2439               | -                                        | -                                        | 1.36E-04                 |
| Inverted formin-2                                                      | <i>INF2</i>   | -4.4475 | -4.0507 | -0.3968               | -                                        | -                                        | 1.37E-02                 |
| Type II inositol 3,4-bisphosphate 4-phosphatase                        | <i>INPP4B</i> | -1.7958 | -3.9699 | 2.1741                | -                                        | -                                        | 1.10E-04                 |
| Importin-4                                                             | <i>IPO4</i>   | -2.2897 | -0.0808 | -2.2089               | -                                        | -                                        | 9.36E-05                 |
| Importin-5                                                             | <i>IPO5</i>   | -0.0041 | 0.2329  | -0.2370               | -                                        | -                                        | 5.74E-03                 |
| Isochorismatase domain-containing protein 2, mitochondrial             | <i>ISOC2</i>  | -0.5641 | -3.1321 | 2.5680                | 0.8023                                   | -0.7554                                  | 3.33E-04                 |
| Inositol-3-phosphate synthase 1                                        | <i>ISYNA1</i> | -2.2436 | -1.4688 | -0.7748               | -                                        | -                                        | 7.56E-04                 |
| Inter-alpha-trypsin inhibitor heavy chain H1                           | <i>ITIH1</i>  | 1.6454  | 3.4690  | -1.8236               | -0.6891                                  | -0.3507                                  | 3.10E-04                 |
| Inter-alpha-trypsin inhibitor heavy chain H2                           | <i>ITIH2</i>  | 2.1574  | 2.8819  | -0.7244               | -                                        | -                                        | 3.82E-04                 |
| BTB/POZ domain-containing protein KCTD12                               | <i>KCTD12</i> | 0.6244  | 1.4348  | -0.8104               | -                                        | -                                        | 2.72E-03                 |
| Far upstream element-binding protein 2                                 | <i>KHSRP</i>  | -0.1110 | 1.2768  | -1.3878               | -                                        | -                                        | 6.82E-03                 |
| Importin subunit beta-1                                                | <i>KPNB1</i>  | 0.7714  | 1.4630  | -0.6915               | -                                        | -                                        | 6.14E-04                 |

| Protein Name                                              | Gene Symbol     | MPT Lfq | FPT Lfq | MPT X FPT fold change | DEPs in the MPT x MNT group' comparison* | DEPs in the MPT x MLN group' comparison* | Student's T-test p-value |
|-----------------------------------------------------------|-----------------|---------|---------|-----------------------|------------------------------------------|------------------------------------------|--------------------------|
| Kinectin                                                  | <i>KTN1</i>     | 0.3494  | -1.0971 | 1.4464                | -                                        | -                                        | 7.73E-03                 |
| Laminin subunit alpha-5                                   | <i>LAMA5</i>    | -2.9345 | -2.0937 | -0.8408               | -                                        | -                                        | 7.57E-03                 |
| Laminin subunit beta-1                                    | <i>LAMB1</i>    | -1.8390 | -0.5084 | -1.3306               | -                                        | -                                        | 4.50E-03                 |
| Laminin subunit gamma-1                                   | <i>LAMC1</i>    | 0.2735  | 1.0656  | -0.7921               | -                                        | -                                        | 1.17E-02                 |
| Lysosome-associated membrane glycoprotein 2               | <i>LAMP2</i>    | -1.3820 | -0.3759 | -1.0061               | -                                        | -                                        | 4.87E-04                 |
| Cytosol aminopeptidase                                    | <i>LAP3</i>     | 3.2417  | 3.6837  | -0.4420               | -                                        | -                                        | 1.03E-02                 |
| Plastin-2                                                 | <i>LCP1</i>     | 3.2706  | 5.0824  | -1.8118               | 0.9455                                   | -1.0239                                  | 1.22E-04                 |
| Galectin-1                                                | <i>LGALS1</i>   | 2.7285  | 3.8070  | -1.0785               | -                                        | -                                        | 1.13E-03                 |
| Galectin-3-binding protein                                | <i>LGALS3BP</i> | 1.8023  | 0.4221  | 1.3802                | -                                        | -                                        | 3.18E-04                 |
| Hormone-sensitive lipase                                  | <i>LIPE</i>     | -4.5201 | -2.5547 | -1.9654               | -                                        | -                                        | 1.89E-04                 |
| Vesicular integral-membrane protein VIP36                 | <i>LMAN2</i>    | 0.0269  | -1.6200 | 1.6470                | 1.6593                                   | -                                        | 3.04E-04                 |
| LIM and cysteine-rich domains protein 1                   | <i>LMCD1</i>    | -0.5599 | -1.1397 | 0.5798                | -                                        | -                                        | 4.10E-03                 |
| Lamin-B2                                                  | <i>LMNB2</i>    | 1.6408  | 2.0218  | -0.3810               | -                                        | -                                        | 2.10E-03                 |
| Leucine-rich repeat-containing protein 47                 | <i>LRRC47</i>   | 0.1146  | -1.1910 | 1.3056                | -                                        | -                                        | 1.21E-02                 |
| U6 snRNA-associated Sm-like protein LSm4                  | <i>LSM4</i>     | -3.6809 | -1.9939 | -1.6869               | -                                        | -                                        | 1.45E-02                 |
| Leukotriene A-4 hydrolase                                 | <i>LTA4H</i>    | -0.3271 | 0.8830  | -1.2102               | -                                        | -                                        | 1.19E-03                 |
| Lumican                                                   | <i>LUM</i>      | 5.7124  | 7.6723  | -1.9599               | -0.4729                                  | 0.4100                                   | 1.78E-04                 |
| Melanoma-associated antigen D2                            | <i>MAGED2</i>   | 0.4622  | -0.9588 | 1.4210                | -                                        | -                                        | 4.10E-04                 |
| Amine oxidase [flavin-containing] B                       | <i>MAOB</i>     | 0.5870  | -0.4767 | 1.0637                | -                                        | -                                        | 8.38E-03                 |
| Microtubule-associated protein RP/EB family member 1      | <i>MAPRE1</i>   | 0.3237  | -0.8793 | 1.2030                | -                                        | -                                        | 1.16E-03                 |
| S-adenosylmethionine synthase isoform type-2              | <i>MAT2A</i>    | -0.1524 | -0.8521 | 0.6997                | -                                        | -                                        | 3.15E-03                 |
| Methylcrotonoyl-CoA carboxylase beta chain, mitochondrial | <i>MCCC2</i>    | 1.1976  | -1.2210 | 2.4187                | 1.8812                                   | 1.5843                                   | 7.27E-04                 |
| DNA replication licensing factor MCM7                     | <i>MCM7</i>     | -2.1827 | -1.4562 | -0.7265               | -                                        | -                                        | 1.15E-02                 |

| Protein Name                                                                | Gene Symbol    | MPT LFG | FPT LFG | MPT X FPT fold change | DEPs in the MPT x MNT group' comparison* | DEPs in the MPT x MLN group' comparison* | Student's T-test p-value |
|-----------------------------------------------------------------------------|----------------|---------|---------|-----------------------|------------------------------------------|------------------------------------------|--------------------------|
| Microsomal glutathione S-transferase 1                                      | <i>MGST1</i>   | 0.7456  | -0.1799 | 0.9255                | -                                        | -                                        | 1.20E-02                 |
| Macrophage migration inhibitory factor                                      | <i>MIF</i>     | 0.5912  | 3.2137  | -2.6225               | -                                        | -                                        | 4.51E-05                 |
| C-type mannose receptor 2                                                   | <i>MRC2</i>    | -2.5560 | -1.6755 | -0.8804               | -                                        | -                                        | 1.62E-02                 |
| RNA-binding protein Musashi homolog 2                                       | <i>MSI2</i>    | -1.6609 | -2.2601 | 0.5993                | -                                        | -                                        | 1.23E-02                 |
| Moesin                                                                      | <i>MSN</i>     | 3.0626  | 3.7406  | -0.6780               | -                                        | -                                        | 4.82E-03                 |
| Major vault protein                                                         | <i>MVP</i>     | 2.5716  | 1.1437  | 1.4279                | -                                        | -                                        | 3.38E-03                 |
| Myb-binding protein 1A                                                      | <i>MYBBP1A</i> | -3.2834 | -1.4580 | -1.8254               | -                                        | -                                        | 2.41E-03                 |
| Myosin-10                                                                   | <i>MYH10</i>   | 0.3283  | -0.4661 | 0.7944                | -                                        | -                                        | 1.74E-02                 |
| Myosin-11                                                                   | <i>MYH11</i>   | 2.4111  | 1.4264  | 0.9847                | -                                        | -                                        | 1.51E-03                 |
| Myosin light polypeptide 6                                                  | <i>MYL6</i>    | 3.2217  | 3.5965  | -0.3748               | -                                        | -                                        | 5.67E-03                 |
| Unconventional myosin-Ib                                                    | <i>MYO1B</i>   | -2.4063 | -3.1032 | 0.6968                | -                                        | -                                        | 1.67E-02                 |
| Unconventional myosin-Ic                                                    | <i>MYO1C</i>   | 1.7962  | 2.2503  | -0.4540               | -                                        | -                                        | 1.21E-04                 |
| Unconventional myosin-VI                                                    | <i>MYO6</i>    | 1.1341  | -0.7369 | 1.8710                | -                                        | -                                        | 3.95E-04                 |
| Sialic acid synthase                                                        | <i>NANS</i>    | 0.3406  | 1.1899  | -0.8494               | -                                        | -                                        | 1.02E-02                 |
| Alpha-soluble NSF attachment protein                                        | <i>NAPA</i>    | 0.6784  | -0.4962 | 1.1746                | -                                        | -                                        | 2.69E-03                 |
| Nck-associated protein 1                                                    | <i>NCKAP1</i>  | -2.6760 | -3.2131 | 0.5371                | -                                        | -                                        | 8.75E-05                 |
| Nucleolin                                                                   | <i>NCL</i>     | 3.6149  | 4.3590  | -0.7441               | -                                        | -                                        | 3.32E-04                 |
| Protein NDRG1                                                               | <i>NDRG1</i>   | 0.1174  | -1.8684 | 1.9858                | -                                        | -                                        | 7.90E-03                 |
| NADH dehydrogenase [ubiquinone] 1 alpha subcomplex subunit 9, mitochondrial | <i>NDUFA9</i>  | -1.1008 | -0.5974 | -0.5034               | -                                        | -                                        | 2.18E-03                 |
| Negative elongation factor B                                                | <i>NELFB</i>   | -5.4219 | -4.0042 | -1.4176               | -                                        | -                                        | 6.86E-03                 |
| Nidogen-2                                                                   | <i>NID2</i>    | -0.6810 | 0.1636  | -0.8446               | -                                        | -                                        | 2.99E-04                 |
| NAD(P) transhydrogenase, mitochondrial                                      | <i>NNT</i>     | -0.8273 | -1.8392 | 1.0119                | -                                        | -                                        | 9.72E-03                 |
| Nucleolar and coiled-body phosphoprotein 1                                  | <i>NOLC1</i>   | 0.1261  | 5.1124  | -4.9862               | -                                        | -                                        | 1.39E-02                 |
| Non-POU domain-containing octamer-binding protein                           | <i>NONO</i>    | 0.9915  | 1.6669  | -0.6754               | -                                        | -                                        | 5.84E-04                 |

| Protein Name                                                  | Gene Symbol    | MPT Lfq | FPT Lfq | MPT X FPT fold change | DEPs in the MPT x MNT group' comparison* | DEPs in the MPT x MLN group' comparison* | Student's T-test p-value |
|---------------------------------------------------------------|----------------|---------|---------|-----------------------|------------------------------------------|------------------------------------------|--------------------------|
| Vesicle-fusing ATPase                                         | <i>NSF</i>     | 1.6490  | -0.0551 | 1.7041                | 1.6399                                   | -                                        | 1.76E-03                 |
| Nuclear pore complex protein Nup155                           | <i>NUP155</i>  | -2.7349 | -2.3557 | -0.3792               | -                                        | -                                        | 6.48E-03                 |
| Nuclear transport factor 2                                    | <i>NUTF2</i>   | -1.7343 | -0.8731 | -0.8612               | -                                        | -                                        | 1.98E-02                 |
| Mimecan                                                       | <i>OGN</i>     | 4.1033  | 7.1633  | -3.0599               | -2.1022                                  | 2.1600                                   | 2.13E-06                 |
| Olfactomedin-like protein 1                                   | <i>OLFML1</i>  | -2.1217 | -0.2228 | -1.8989               | -                                        | -                                        | 4.01E-03                 |
| Alpha-1-acid glycoprotein 1                                   | <i>ORM1</i>    | 2.1804  | 3.3065  | -1.1261               | -                                        | -                                        | 1.16E-03                 |
| Ubiquitin thioesterase OTUB1                                  | <i>OTUB1</i>   | 1.9658  | 1.3198  | 0.6460                | -                                        | -                                        | 4.41E-03                 |
| Protein disulfide-isomerase                                   | <i>P4HB</i>    | 4.6745  | 4.3509  | 0.3236                | -                                        | -                                        | 5.62E-03                 |
| Proliferation-associated protein 2G4                          | <i>PA2G4</i>   | 0.1517  | 1.1207  | -0.9690               | -                                        | -                                        | 1.63E-03                 |
| Palladin                                                      | <i>PALLD</i>   | 1.1876  | -0.3743 | 1.5618                | 1.4748                                   | 0.3718                                   | 1.98E-04                 |
| Poly [ADP-ribose] polymerase 1                                | <i>PARP1</i>   | 2.6625  | 1.7573  | 0.9052                | -                                        | -                                        | 1.39E-02                 |
| Poly(rC)-binding protein 1                                    | <i>PCBP1</i>   | 1.6553  | 2.3071  | -0.6518               | -                                        | -                                        | 2.23E-03                 |
| Phosphoenolpyruvate carboxykinase [GTP], mitochondrial        | <i>PCK2</i>    | -0.4471 | 0.9325  | -1.3796               | -                                        | -                                        | 5.74E-04                 |
| Proliferating cell nuclear antigen                            | <i>PCNA</i>    | 0.3166  | 1.4645  | -1.1479               | -                                        | -                                        | 7.17E-04                 |
| Programmed cell death protein 6                               | <i>PDCD6</i>   | -0.4946 | -0.8337 | 0.3391                | -                                        | -                                        | 1.56E-02                 |
| Programmed cell death 6-interacting protein                   | <i>PDCD6IP</i> | 2.1547  | 1.3694  | 0.7854                | -                                        | -                                        | 5.07E-04                 |
| Protein disulfide-isomerase A4                                | <i>PDIA4</i>   | 2.4330  | 3.3994  | -0.9664               | -                                        | -                                        | 3.39E-03                 |
| Protein disulfide-isomerase A6                                | <i>PDIA6</i>   | 2.5872  | 3.2019  | -0.6147               | -                                        | -                                        | 1.32E-03                 |
| Pyridoxal-dependent decarboxylase domain-containing protein 1 | <i>PDXDC1</i>  | 0.4430  | -0.5254 | 0.9683                | -                                        | -                                        | 1.79E-03                 |
| Pyridoxal kinase                                              | <i>PDXK</i>    | -0.7275 | 0.1895  | -0.9170               | -                                        | -                                        | 2.86E-03                 |
| ATP-dependent 6-phosphofructokinase, liver type               | <i>PFKL</i>    | 0.7309  | 1.7343  | -1.0034               | -                                        | -                                        | 2.65E-03                 |
| Profilin-1                                                    | <i>PFN1</i>    | 2.8038  | 4.4528  | -1.6491               | 0.6366                                   | -                                        | 4.81E-05                 |
| 6-phosphogluconate dehydrogenase, decarboxylating             | <i>PGD</i>     | 2.0258  | 2.9043  | -0.8786               | -                                        | -                                        | 7.91E-05                 |
| Phosphoglycerate kinase 1                                     | <i>PGK1</i>    | 5.2569  | 5.6828  | -0.4259               | -                                        | -                                        | 3.29E-04                 |

| Protein Name                                                                      | Gene Symbol    | MPT LFQ | FPT LFQ | MPT X FPT fold change | DEPs in the MPT x MNT group' comparison* | DEPs in the MPT x MLN group' comparison* | Student's T-test p-value |
|-----------------------------------------------------------------------------------|----------------|---------|---------|-----------------------|------------------------------------------|------------------------------------------|--------------------------|
| 6-phosphogluconolactonase                                                         | <i>PGLS</i>    | 1.0441  | 1.7637  | -0.7197               | -                                        | -                                        | 6.77E-04                 |
| Phosphoglucomutase-1                                                              | <i>PGM1</i>    | 0.9263  | 0.3894  | 0.5369                | -                                        | -                                        | 4.11E-04                 |
| Prohibitin                                                                        | <i>PHB</i>     | 3.7259  | 3.0640  | 0.6619                | -                                        | -                                        | 3.55E-03                 |
| Prohibitin-2                                                                      | <i>PHB2</i>    | 3.3014  | 2.5926  | 0.7088                | -                                        | -                                        | 5.13E-04                 |
| D-3-phosphoglycerate dehydrogenase                                                | <i>PHGDH</i>   | -0.1505 | 1.4755  | -1.6261               | -2.8642                                  | 0.6712                                   | 3.98E-05                 |
| Plectin                                                                           | <i>PLEC</i>    | 4.6501  | 4.2411  | 0.4090                | -                                        | -                                        | 1.56E-02                 |
| Perilipin-1                                                                       | <i>PLIN1</i>   | -0.5113 | 1.5714  | -2.0827               | -7.3640                                  | -0.4549                                  | 6.65E-03                 |
| Purine nucleoside phosphorylase                                                   | <i>PNP</i>     | 2.4730  | 1.8265  | 0.6465                | -                                        | -                                        | 8.23E-04                 |
| Serine/threonine-protein phosphatase 2A 65 kDa regulatory subunit A alpha isoform | <i>PPP2R1A</i> | 0.9321  | 1.5283  | -0.5963               | -                                        | -                                        | 7.62E-06                 |
| Lysosomal Pro-X carboxypeptidase                                                  | <i>PRCP</i>    | -4.1008 | -2.5469 | -1.5539               | -                                        | -                                        | 6.37E-03                 |
| Peroxiredoxin-1                                                                   | <i>PRDX1</i>   | 4.9711  | 4.6477  | 0.3234                | -                                        | -                                        | 2.36E-04                 |
| Peroxiredoxin-2                                                                   | <i>PRDX2</i>   | 2.9288  | 3.5377  | -0.6089               | -                                        | -                                        | 4.94E-04                 |
| Thioredoxin-dependent peroxide reductase, mitochondrial                           | <i>PRDX3</i>   | 2.2241  | 1.4052  | 0.8190                | -                                        | -                                        | 6.29E-04                 |
| Peroxiredoxin-4                                                                   | <i>PRDX4</i>   | 1.3394  | 0.0735  | 1.2659                | -                                        | -                                        | 3.67E-03                 |
| Peroxiredoxin-5, mitochondrial                                                    | <i>PRDX5</i>   | 1.4343  | 2.3146  | -0.8802               | -                                        | -                                        | 6.99E-04                 |
| Peroxiredoxin-6                                                                   | <i>PRDX6</i>   | 4.2584  | 3.6548  | 0.6036                | -                                        | -                                        | 1.75E-03                 |
| Prolargin                                                                         | <i>PRELP</i>   | 3.8360  | 5.0968  | -1.2608               | -                                        | -                                        | 3.34E-03                 |
| Phosphatidylinositol 3,4,5-trisphosphate-dependent Rac exchanger 1 protein        | <i>PREX1</i>   | 0.5417  | -2.0682 | 2.6099                | -                                        | -                                        | 3.54E-04                 |
| Glucosidase 2 subunit beta                                                        | <i>PRKCSH</i>  | 0.4205  | 1.5991  | -1.1786               | -                                        | -                                        | 1.11E-03                 |
| DNA-dependent protein kinase catalytic subunit                                    | <i>PRKDC</i>   | 2.4480  | 4.0590  | -1.6110               | 1.6933                                   | -                                        | 9.56E-05                 |
| Pre-mRNA-processing factor 19                                                     | <i>PRPF19</i>  | -0.3784 | 0.2675  | -0.6459               | -                                        | -                                        | 3.09E-03                 |
| Pre-mRNA-processing factor 40 homolog A                                           | <i>PRPF40A</i> | -2.8519 | -1.6169 | -1.2349               | -                                        | -                                        | 1.06E-02                 |

| Protein Name                                     | Gene Symbol  | MPT LFQ | FPT LFQ | MPT X FPT fold change | DEPs in the MPT x MNT group' comparison* | DEPs in the MPT x MLN group' comparison* | Student's T-test p-value |
|--------------------------------------------------|--------------|---------|---------|-----------------------|------------------------------------------|------------------------------------------|--------------------------|
| 26S protease regulatory subunit 6A               | <i>PSMC3</i> | -0.6115 | 0.3288  | -0.9403               | -                                        | -                                        | 3.69E-03                 |
| 26S proteasome non-ATPase regulatory subunit 3   | <i>PSMD3</i> | 0.1434  | -0.6757 | 0.8191                | -                                        | -                                        | 1.16E-03                 |
| 26S proteasome non-ATPase regulatory subunit 5   | <i>PSMD5</i> | -0.5591 | 0.0272  | -0.5863               | -                                        | -                                        | 8.33E-03                 |
| Proteasome activator complex subunit 1           | <i>PSME1</i> | 3.0662  | 4.3039  | -1.2377               | -                                        | -                                        | 1.43E-04                 |
| Proteasome activator complex subunit 2           | <i>PSME2</i> | 1.5963  | 2.7401  | -1.1438               | -                                        | -                                        | 1.70E-03                 |
| Prostacyclin synthase                            | <i>PTGIS</i> | -3.1416 | -0.6804 | -2.4612               | -3.6036                                  | -0.3787                                  | 1.21E-03                 |
| Prostaglandin reductase 1                        | <i>PTGR1</i> | -1.6833 | -3.0809 | 1.3975                | -                                        | -                                        | 7.63E-04                 |
| Tyrosine-protein phosphatase non-receptor type 6 | <i>PTPN6</i> | -1.2336 | -0.5445 | -0.6891               | -                                        | -                                        | 4.35E-03                 |
| Transcriptional activator protein Pur-alpha      | <i>PURA</i>  | -0.7149 | -1.2377 | 0.5228                | -                                        | -                                        | 1.06E-02                 |
| Glutamine--tRNA ligase                           | <i>QARS</i>  | -0.1372 | -0.7230 | 0.5859                | -                                        | -                                        | 1.42E-03                 |
| Ras-related protein Rab-10                       | <i>RAB10</i> | -1.2062 | -2.4212 | 1.2150                | -                                        | -                                        | 4.71E-04                 |
| Ras-related protein Rab-7a                       | <i>RAB7A</i> | 1.7375  | 0.5861  | 1.1514                | -                                        | -                                        | 8.79E-06                 |
| Ras-related protein Rab-8A                       | <i>RAB8A</i> | -1.7160 | -2.1427 | 0.4267                | -                                        | -                                        | 1.19E-02                 |
| Ras-related protein Rap-1A                       | <i>RAP1A</i> | 2.0609  | 1.4358  | 0.6251                | -                                        | -                                        | 2.07E-03                 |
| Arginine--tRNA ligase, cytoplasmic               | <i>RARS</i>  | 1.8054  | 0.2763  | 1.5291                | -                                        | -                                        | 3.12E-04                 |
| Protein RCC2                                     | <i>RCC2</i>  | -1.1127 | -0.6524 | -0.4603               | -                                        | -                                        | 1.65E-02                 |
| Retinol dehydrogenase 13                         | <i>RDH13</i> | -4.1484 | -2.8013 | -1.3471               | -                                        | -                                        | 1.56E-03                 |
| 60S ribosomal protein L12                        | <i>RPL12</i> | 1.6658  | 1.0697  | 0.5961                | -                                        | -                                        | 1.67E-03                 |
| 60S ribosomal protein L23                        | <i>RPL23</i> | -1.3517 | 0.6730  | -2.0247               | -                                        | -                                        | 1.22E-04                 |
| 60S ribosomal protein L3                         | <i>RPL3</i>  | 1.3243  | 0.5648  | 0.7596                | -                                        | -                                        | 4.89E-03                 |
| 60S ribosomal protein L30                        | <i>RPL30</i> | -2.6438 | -0.3398 | -2.3040               | -                                        | -                                        | 2.06E-03                 |
| 60S ribosomal protein L35                        | <i>RPL35</i> | -1.0932 | -2.6959 | 1.6026                | -                                        | -                                        | 7.43E-04                 |
| 60S ribosomal protein L36                        | <i>RPL36</i> | -1.1263 | -0.1673 | -0.9590               | -                                        | -                                        | 5.52E-04                 |
| 60S ribosomal protein L6                         | <i>RPL6</i>  | 2.0942  | 1.2756  | 0.8186                | -                                        | -                                        | 1.12E-02                 |
| 60S ribosomal protein L7                         | <i>RPL7</i>  | 1.5951  | 2.6157  | -1.0207               | -                                        | -                                        | 4.45E-03                 |

| Protein Name                                                             | Gene Symbol     | MPT Lfq | FPT Lfq | MPT X FPT fold change | DEPs in the MPT x MNT group' comparison* | DEPs in the MPT x MLN group' comparison* | Student's T-test p-value |
|--------------------------------------------------------------------------|-----------------|---------|---------|-----------------------|------------------------------------------|------------------------------------------|--------------------------|
| 60S acidic ribosomal protein P2                                          | <i>RPLP2</i>    | -0.7787 | 1.0729  | -1.8516               | -                                        | -                                        | 4.61E-04                 |
| Dolichyl-diphosphooligosaccharide--protein glycosyltransferase subunit 2 | <i>RPN2</i>     | 2.3158  | 2.0184  | 0.2974                | -                                        | -                                        | 1.12E-02                 |
| 40S ribosomal protein S12                                                | <i>RPS12</i>    | -1.3264 | -0.6046 | -0.7218               | -                                        | -                                        | 1.62E-02                 |
| 40S ribosomal protein S15                                                | <i>RPS15</i>    | -2.2259 | -1.6276 | -0.5984               | -                                        | -                                        | 4.59E-03                 |
| 40S ribosomal protein S19                                                | <i>RPS19</i>    | 1.0031  | 0.4284  | 0.5747                | -                                        | -                                        | 8.30E-03                 |
| 40S ribosomal protein S2                                                 | <i>RPS2</i>     | 1.8521  | 1.3000  | 0.5521                | -                                        | -                                        | 1.37E-02                 |
| 40S ribosomal protein S25                                                | <i>RPS25</i>    | 0.3141  | 1.0812  | -0.7671               | -                                        | -                                        | 1.34E-02                 |
| 40S ribosomal protein S7                                                 | <i>RPS7</i>     | 0.1310  | -0.1657 | 0.2967                | -                                        | -                                        | 1.79E-02                 |
| 40S ribosomal protein S8                                                 | <i>RPS8</i>     | 1.6164  | 2.1685  | -0.5521               | -                                        | -                                        | 6.41E-03                 |
| 40S ribosomal protein SA                                                 | <i>RPSA</i>     | 2.8031  | 3.3727  | -0.5696               | -                                        | -                                        | 2.63E-03                 |
| Ribosomal L1 domain-containing protein 1                                 | <i>RSL1D1</i>   | -0.9366 | 0.2162  | -1.1528               | -                                        | -                                        | 5.01E-06                 |
| RuvB-like 1                                                              | <i>RUVBL1</i>   | 1.2807  | 0.4469  | 0.8338                | -                                        | -                                        | 6.79E-03                 |
| RuvB-like 2                                                              | <i>RUVBL2</i>   | 1.0146  | 0.4119  | 0.6027                | -                                        | -                                        | 9.94E-03                 |
| Protein S100-A10                                                         | <i>S100A10</i>  | -1.5560 | 0.8012  | -2.3572               | -                                        | -                                        | 1.40E-02                 |
| Protein S100-A4                                                          | <i>S100A4</i>   | 0.3326  | 1.4087  | -1.0761               | -                                        | -                                        | 3.66E-03                 |
| Deoxynucleoside triphosphate triphosphohydrolase SAMHD1                  | <i>SAMHD1</i>   | 2.4038  | 3.1888  | -0.7850               | -                                        | -                                        | 5.91E-04                 |
| Sec1 family domain-containing protein 1                                  | <i>SCFD1</i>    | -0.5775 | 0.5056  | -1.0831               | -                                        | -                                        | 3.94E-03                 |
| Protein scribble homolog                                                 | <i>SCRIB</i>    | -1.4489 | -2.8106 | 1.3618                | -                                        | -                                        | 2.43E-03                 |
| Succinate dehydrogenase [ubiquinone] iron-sulfur subunit, mitochondrial  | <i>SDHB</i>     | -1.4024 | -0.1433 | -1.2591               | -                                        | -                                        | 5.33E-04                 |
| Protein transport protein Sec31A                                         | <i>SEC31A</i>   | 0.9255  | -0.2277 | 1.1532                | -                                        | -                                        | 6.82E-03                 |
| Translocation protein SEC63 homolog                                      | <i>SEC63</i>    | -0.7103 | -2.2640 | 1.5537                | 0.9846                                   | -                                        | 3.50E-03                 |
| Septin-9                                                                 | <i>SEPT9</i>    | 0.9382  | 1.5747  | -0.6365               | -                                        | -                                        | 9.80E-03                 |
| Kallistatin                                                              | <i>SERPINA4</i> | -0.7923 | 0.5419  | -1.3342               | -                                        | -                                        | 4.99E-04                 |
| Leukocyte elastase inhibitor                                             | <i>SERPINB1</i> | 1.5539  | 2.5313  | -0.9775               | -                                        | -                                        | 4.39E-03                 |
| Serpin B6                                                                | <i>SERPINB6</i> | 0.5586  | 1.5812  | -1.0226               | -                                        | -                                        | 1.78E-03                 |



| Protein Name                                          | Gene Symbol     | MPT LFQ | FPT LFQ | MPT X FPT fold change | DEPs in the MPT x MNT group' comparison* | DEPs in the MPT x MLN group' comparison* | Student's T-test p-value |
|-------------------------------------------------------|-----------------|---------|---------|-----------------------|------------------------------------------|------------------------------------------|--------------------------|
| Serpin B9                                             | <i>SERPINB9</i> | -2.2324 | 0.7892  | -3.0217               | -                                        | -                                        | 1.29E-05                 |
| Antithrombin-III                                      | <i>SERPINC1</i> | 2.9658  | 3.6816  | -0.7157               | -                                        | -                                        | 3.95E-04                 |
| Heparin cofactor 2                                    | <i>SERPIND1</i> | -0.2495 | 1.5455  | -1.7950               | -2.5463                                  | 0.7040                                   | 5.04E-05                 |
| Pigment epithelium-derived factor                     | <i>SERPINF1</i> | 2.9810  | 3.2276  | -0.2466               | -                                        | -                                        | 8.08E-03                 |
| Plasma protease C1 inhibitor                          | <i>SERPING1</i> | 2.2555  | 2.5661  | -0.3106               | -                                        | -                                        | 1.16E-03                 |
| Serpin H1                                             | <i>SERPINH1</i> | 3.8463  | 3.3332  | 0.5131                | -                                        | -                                        | 1.95E-03                 |
| SH3 domain-binding glutamic acid-rich-like protein    | <i>SH3BGRL</i>  | 1.6886  | -0.0278 | 1.7164                | 1.5526                                   | -                                        | 9.65E-05                 |
| Mitochondrial dicarboxylate carrier                   | <i>SLC25A10</i> | -0.7371 | -1.6041 | 0.8669                | -                                        | -                                        | 1.42E-03                 |
| Calcium-binding mitochondrial carrier protein SCaMC-1 | <i>SLC25A24</i> | -1.9389 | 1.0513  | -2.9903               | -                                        | -                                        | 3.90E-04                 |
| 4F2 cell-surface antigen heavy chain                  | <i>SLC3A2</i>   | -0.6195 | -0.0451 | -0.5744               | -                                        | -                                        | 1.88E-02                 |
| Band 3 anion transport protein                        | <i>SLC4A1</i>   | -1.0871 | 0.2559  | -1.3430               | -                                        | -                                        | 2.57E-03                 |
| Na(+)/H(+) exchange regulatory cofactor NHE-RF1       | <i>SLC9A3R1</i> | 1.1481  | -0.7538 | 1.9019                | 3.2788                                   | -                                        | 7.81E-04                 |
| Small nuclear ribonucleoprotein Sm D3                 | <i>SNRPD3</i>   | -0.3577 | 1.0134  | -1.3711               | -                                        | -                                        | 6.07E-05                 |
| Sorting nexin-3                                       | <i>SNX3</i>     | -0.1125 | -1.6178 | 1.5054                | -                                        | -                                        | 9.56E-04                 |
| Extracellular superoxide dismutase [Cu-Zn]            | <i>SOD3</i>     | -1.8878 | 1.3966  | -3.2844               | -                                        | -                                        | 1.11E-03                 |
| Sorbitol dehydrogenase                                | <i>SORD</i>     | 2.8848  | -1.8654 | 4.7502                | 3.5766                                   | 0.7255                                   | 3.11E-05                 |
| Sepiapterin reductase                                 | <i>SPR</i>      | -0.7473 | -2.0268 | 1.2795                | -                                        | -                                        | 1.21E-02                 |
| Spectrin alpha chain, non-erythrocytic 1              | <i>SPTAN1</i>   | 2.1239  | 2.5604  | -0.4365               | -                                        | -                                        | 2.12E-04                 |
| Spectrin beta chain, erythrocytic                     | <i>SPTB</i>     | -5.7627 | -3.5939 | -2.1688               | -                                        | -                                        | 2.12E-03                 |
| Spectrin beta chain, non-erythrocytic 1               | <i>SPTBN1</i>   | 1.8119  | 2.1804  | -0.3685               | -                                        | -                                        | 4.54E-03                 |
| Signal recognition particle 14 kDa protein            | <i>SRP14</i>    | -0.4287 | 0.3701  | -0.7988               | -                                        | -                                        | 9.31E-03                 |
| Serine/arginine-rich splicing factor 1                | <i>SRSF1</i>    | 0.8749  | 1.2053  | -0.3304               | -                                        | -                                        | 1.33E-02                 |
| Single-stranded DNA-binding protein, mitochondrial    | <i>SSBP1</i>    | -0.1478 | -0.9119 | 0.7641                | -                                        | -                                        | 1.22E-02                 |

| Protein Name                                                  | Gene Symbol    | MPT LFQ | FPT LFQ | MPT X FPT fold change | DEPs in the MPT x MNT group' comparison* | DEPs in the MPT x MLN group' comparison* | Student's T-test p-value |
|---------------------------------------------------------------|----------------|---------|---------|-----------------------|------------------------------------------|------------------------------------------|--------------------------|
| Translocon-associated protein subunit delta                   | <i>SSR4</i>    | -0.1461 | 0.4041  | -0.5502               | -                                        | -                                        | 1.46E-02                 |
| FACT complex subunit SSRP1                                    | <i>SSRP1</i>   | 0.0294  | 0.9383  | -0.9089               | -                                        | -                                        | 5.46E-04                 |
| PCTP-like protein                                             | <i>STARD10</i> | -0.3574 | -1.1051 | 0.7477                | -                                        | -                                        | 8.29E-04                 |
| Stomatin-like protein 2, mitochondrial                        | <i>STOML2</i>  | -2.0558 | -1.4653 | -0.5906               | -                                        | -                                        | 3.99E-03                 |
| Succinyl-CoA ligase [GDP-forming] subunit beta, mitochondrial | <i>SUCLG2</i>  | 0.0472  | 0.5494  | -0.5022               | -                                        | -                                        | 4.19E-04                 |
| Transgelin                                                    | <i>TAGLN</i>   | 4.3480  | 3.0404  | 1.3076                | -                                        | -                                        | 2.40E-04                 |
| Transgelin-2                                                  | <i>TAGLN2</i>  | 3.3209  | 2.1410  | 1.1799                | -                                        | -                                        | 7.77E-04                 |
| Transaldolase                                                 | <i>TALDO1</i>  | 1.7731  | 2.2881  | -0.5150               | -                                        | -                                        | 1.61E-03                 |
| Antigen peptide transporter 2                                 | <i>TAP2</i>    | -1.8405 | -1.1001 | -0.7403               | -                                        | -                                        | 3.99E-03                 |
| TAR DNA-binding protein 43                                    | <i>TARDBP</i>  | -1.7159 | -2.5892 | 0.8733                | -                                        | -                                        | 1.95E-02                 |
| Threonine--tRNA ligase, cytoplasmic                           | <i>TARS</i>    | 0.3155  | 0.8323  | -0.5167               | -                                        | -                                        | 8.90E-04                 |
| Serotransferrin                                               | <i>TF</i>      | 4.9653  | 6.6243  | -1.6590               | -0.8474                                  | 0.5147                                   | 1.06E-04                 |
| Transforming growth factor-beta-induced protein ig-h3         | <i>TGFBI</i>   | 3.3410  | 3.7941  | -0.4531               | -                                        | -                                        | 7.14E-03                 |
| Thrombospondin-1                                              | <i>THBS1</i>   | 4.0665  | 1.5728  | 2.4937                | 2.3688                                   | 0.8471                                   | 2.04E-04                 |
| THO complex subunit 6 homolog                                 | <i>THOC6</i>   | -3.8006 | -3.3799 | -0.4207               | -                                        | -                                        | 4.30E-03                 |
| Mitochondrial import inner membrane translocase subunit TIM44 | <i>TIMM44</i>  | -3.0074 | -2.2011 | -0.8064               | -                                        | -                                        | 1.16E-02                 |
| Transketolase                                                 | <i>TKT</i>     | 3.9051  | 3.2735  | 0.6316                | -                                        | -                                        | 5.51E-03                 |
| Transmembrane and coiled-coil domain-containing protein 1     | <i>TMCO1</i>   | -1.6837 | -3.3929 | 1.7091                | -                                        | -                                        | 6.90E-03                 |
| Transmembrane emp24 domain-containing protein 10              | <i>TMED10</i>  | 0.9672  | 0.4368  | 0.5304                | -                                        | -                                        | 9.48E-05                 |
| Tenascin                                                      | <i>TNC</i>     | 3.3005  | 5.0245  | -1.7240               | 1.9860                                   | 1.6968                                   | 2.35E-05                 |
| Transportin-3                                                 | <i>TNPO3</i>   | -4.3370 | -3.7462 | -0.5908               | -                                        | -                                        | 1.62E-02                 |
| Tenascin-X                                                    | <i>TNXB</i>    | -2.2074 | -0.0595 | -2.1479               | -4.9865                                  | 0.9594                                   | 3.32E-04                 |
| DNA topoisomerase 1                                           | <i>TOP1</i>    | -0.8958 | 0.0503  | -0.9460               | -                                        | -                                        | 9.58E-03                 |

| Protein Name                                               | Gene Symbol    | MPT LFQ | FPT LFQ | MPT X FPT fold change | DEPs in the MPT x MNT group' comparison* | DEPs in the MPT x MLN group' comparison* | Student's T-test p-value |
|------------------------------------------------------------|----------------|---------|---------|-----------------------|------------------------------------------|------------------------------------------|--------------------------|
| Tumor protein D54                                          | <i>TPD52L2</i> | -0.0349 | 0.2607  | -0.2956               | -                                        | -                                        | 1.89E-03                 |
| Triosephosphate isomerase                                  | <i>TPI1</i>    | 4.5354  | 3.8163  | 0.7191                | -                                        | -                                        | 9.26E-03                 |
| Tropomyosin alpha-1 chain                                  | <i>TPM1</i>    | 1.0174  | 0.5473  | 0.4701                | -                                        | -                                        | 4.13E-03                 |
| Transformer-2 protein homolog alpha                        | <i>TRA2A</i>   | -2.7149 | -1.5017 | -1.2133               | -                                        | -                                        | 7.59E-03                 |
| Heat shock protein 75 kDa, mitochondrial                   | <i>TRAP1</i>   | -0.0066 | 0.9584  | -0.9649               | -                                        | -                                        | 1.79E-02                 |
| Transcription intermediary factor 1-beta                   | <i>TRIM28</i>  | 2.2034  | 3.1644  | -0.9611               | -                                        | -                                        | 2.85E-06                 |
| 60 kDa SS-A/Ro ribonucleoprotein                           | <i>TROVE2</i>  | 0.2238  | -0.3770 | 0.6008                | -                                        | -                                        | 1.87E-02                 |
| Translin                                                   | <i>TSN</i>     | -0.3144 | -1.4786 | 1.1642                | -                                        | -                                        | 1.99E-03                 |
| Tubulin--tyrosine ligase-like protein 12                   | <i>TLL12</i>   | 1.8751  | 0.1683  | 1.7068                | 2.2654                                   | -1.6739                                  | 4.34E-04                 |
| Transthyretin                                              | <i>TTR</i>     | 2.6024  | 4.1766  | -1.5742               | -0.9912                                  | 0.3103                                   | 6.04E-05                 |
| Tubulin beta chain                                         | <i>TUBB</i>    | 4.6650  | 5.2282  | -0.5632               | -                                        | -                                        | 6.12E-03                 |
| Tubulin beta-3 chain                                       | <i>TUBB3</i>   | 1.9310  | 0.1963  | 1.7347                | -                                        | -                                        | 3.08E-04                 |
| Tubulin beta-4B chain                                      | <i>TUBB4B</i>  | 5.9746  | 6.7288  | -0.7542               | -                                        | -                                        | 1.02E-03                 |
| Elongation factor Tu, mitochondrial                        | <i>TUFM</i>    | 3.2311  | 3.6925  | -0.4614               | -                                        | -                                        | 4.36E-03                 |
| Twinfilin-1                                                | <i>TWF1</i>    | -0.2051 | -1.3279 | 1.1228                | -                                        | -                                        | 4.04E-03                 |
| Ubiquitin-conjugating enzyme E2 N                          | <i>UBE2N</i>   | 1.0336  | 1.5541  | -0.5205               | -                                        | -                                        | 8.95E-03                 |
| E3 UFM1-protein ligase 1                                   | <i>UFL1</i>    | -0.1857 | -1.1610 | 0.9753                | -                                        | -                                        | 4.23E-04                 |
| Cytochrome b-c1 complex subunit 2, mitochondrial           | <i>UQCRC2</i>  | 2.2081  | 1.3022  | 0.9060                | -                                        | -                                        | 1.76E-03                 |
| General vesicular transport factor p115                    | <i>USO1</i>    | 0.9581  | -1.0775 | 2.0356                | 1.0570                                   | -                                        | 1.46E-03                 |
| Ubiquitin carboxyl-terminal hydrolase 5                    | <i>USP5</i>    | 1.9255  | 0.0957  | 1.8297                | 1.3369                                   | -0.7031                                  | 2.89E-04                 |
| Vesicle-associated membrane protein-associated protein B/C | <i>VAPB</i>    | 0.7592  | -1.0209 | 1.7801                | 1.4288                                   | -                                        | 1.63E-03                 |
| Valine--tRNA ligase                                        | <i>VARS</i>    | 0.5402  | 1.4403  | -0.9001               | -                                        | -                                        | 1.26E-03                 |
| Prefoldin subunit 3                                        | <i>VBP1</i>    | -3.6872 | -2.8850 | -0.8022               | -                                        | -                                        | 4.34E-03                 |
| Versican core protein                                      | <i>VCAN</i>    | 1.6056  | 3.9702  | -2.3646               | -                                        | -                                        | 1.87E-05                 |
| Voltage-dependent anion-selective channel protein 1        | <i>VDAC1</i>   | 3.8396  | 2.6532  | 1.1865                | -                                        | -                                        | 4.35E-06                 |

| Protein Name                                        | Gene Symbol     | MPT LFQ | FPT LFQ | MPT X FPT fold change | DEPs in the MPT x MNT group' comparison* | DEPs in the MPT x MLN group' comparison* | Student's T-test p-value |
|-----------------------------------------------------|-----------------|---------|---------|-----------------------|------------------------------------------|------------------------------------------|--------------------------|
| Voltage-dependent anion-selective channel protein 3 | <i>VDAC3</i>    | 2.6086  | 1.5929  | 1.0157                | -                                        | -                                        | 3.00E-04                 |
| Vimentin                                            | <i>VIM</i>      | 7.7022  | 8.0754  | -0.3732               | -                                        | -                                        | 1.21E-02                 |
| Vacuolar protein sorting-associated protein 26A     | <i>VPS26A</i>   | -1.9639 | -0.9524 | -1.0115               | -                                        | -                                        | 2.86E-03                 |
| Vacuolar protein sorting-associated protein 35      | <i>VPS35</i>    | 1.3684  | 1.5629  | -0.1945               | -                                        | -                                        | 9.42E-04                 |
| von Willebrand factor A domain-containing protein 1 | <i>VWA1</i>     | -1.8005 | -2.9238 | 1.1233                | -                                        | -                                        | 5.32E-03                 |
| WD repeat-containing protein 1                      | <i>WDR1</i>     | 2.7330  | 2.2251  | 0.5079                | -                                        | -                                        | 1.66E-02                 |
| Exportin-5                                          | <i>XPO5</i>     | -4.1165 | -2.8327 | -1.2837               | -                                        | -                                        | 3.76E-04                 |
| X-ray repair cross-complementing protein 5          | <i>XRCC5</i>    | 2.4682  | 3.0233  | -0.5550               | -                                        | -                                        | 6.99E-03                 |
| X-ray repair cross-complementing protein 6          | <i>XRCC6</i>    | 3.1947  | 3.7476  | -0.5529               | -                                        | -                                        | 1.82E-03                 |
| 14-3-3 protein theta                                | <i>YWHAQ</i>    | 0.7696  | 1.5810  | -0.8115               | -                                        | -                                        | 9.56E-04                 |
| CAAX prenyl protease 1 homolog                      | <i>ZMPSTE24</i> | -3.7610 | -1.3514 | -2.4095               | -                                        | -                                        | 2.12E-03                 |

**B.**

| Gene Symbol  | MPT X FPT fold change | GOTERM_BP_DIRECT                                                                                                                                                                                                                                                                                                                                                                                                                                                                                                                                 | GOTERM_CC_DIRECT                                                                                                                                                                                                                                          | GOTERM_MF_DIRECT                                                                                                                                                                                                                                  | KEGG_PATHWAY                                                                                                              |
|--------------|-----------------------|--------------------------------------------------------------------------------------------------------------------------------------------------------------------------------------------------------------------------------------------------------------------------------------------------------------------------------------------------------------------------------------------------------------------------------------------------------------------------------------------------------------------------------------------------|-----------------------------------------------------------------------------------------------------------------------------------------------------------------------------------------------------------------------------------------------------------|---------------------------------------------------------------------------------------------------------------------------------------------------------------------------------------------------------------------------------------------------|---------------------------------------------------------------------------------------------------------------------------|
| <i>SORD</i>  | 4.75                  | GO:0006006~glucose metabolic process,GO:0006062~sorbitol catabolic process,GO:0006970~response to osmotic stress,GO:0009725~response to hormone,GO:0019640~glucuronate catabolic process to xylulose 5-phosphate,GO:0030317~sperm motility,GO:0031667~response to nutrient levels,GO:0042493~response to drug,GO:0046370~fructose biosynthetic process,GO:0046686~response to cadmium ion,GO:0046688~response to copper ion,GO:0051160~L-xylitol catabolic process,GO:0051164~L-xylitol metabolic process,GO:0055114~oxidation-reduction process | GO:0005615~extracellular space,GO:0005829~cytosol,GO:0016020~membrane,GO:0031514~motile cilium,GO:0031966~mitochondrial membrane,GO:0070062~extracellular exosome                                                                                         | GO:0003939~L-idoitol 2-dehydrogenase activity,GO:0008270~zinc ion binding,GO:0016491~oxidoreductase activity,GO:0030246~carbohydrate binding,GO:0042802~identical protein binding,GO:0046526~D-xylulose reductase activity,GO:0051287~NAD binding | hsa00040: Pentose and glucuronate interconversions,hsa00051: Fructose and mannose metabolism,hsa01100: Metabolic pathways |
| <i>CYB5A</i> | 2.59                  | GO:0019852~L-ascorbic acid metabolic process,GO:0046686~response to cadmium ion,GO:0055114~oxidation-reduction process,GO:1902600~hydrogen ion transmembrane transport                                                                                                                                                                                                                                                                                                                                                                           | GO:0005737~cytoplasm,GO:0005741~mitochondrial outer membrane,GO:0005789~endoplasmic reticulum membrane,GO:0016020~membrane,GO:0016021~integral component of membrane,GO:0043231~intracellular membrane-bounded organelle,GO:0070062~extracellular exosome | GO:0004033~aldo-keto reductase (NADP) activity,GO:0004129~cytochrome-c oxidase activity,GO:0019899~enzyme binding,GO:0020037~heme binding,GO:0046872~metal ion binding                                                                            |                                                                                                                           |
| <i>ISOC2</i> | 2.57                  | GO:0008152~metabolic process,GO:0031648~protein destabilization                                                                                                                                                                                                                                                                                                                                                                                                                                                                                  | GO:0005634~nucleus,GO:0005737~cytoplasm                                                                                                                                                                                                                   | GO:0003824~catalytic activity,GO:0005515~protein binding                                                                                                                                                                                          |                                                                                                                           |

| Gene Symbol  | MPT X FPT fold change | GOTERM_BP_DIRECT                                                                                                                                                                                                                                                                                                                                                                                                                                                                                                                                                                                                                                                                                                                                                                                                                                                                                                                                                                                                                                                                                                                                                                                                                                                                                                                                                      | GOTERM_CC_DIRECT                                                                                                                                                                                                                                                                                                                                                                                                                                          | GOTERM_MF_DIRECT                                                                                                                                                                                                                                                                                                                                                                                                                                                                                                                                                                    | KEGG_PATHWAY                                                                                                                                                                                                                                                                                                                        |
|--------------|-----------------------|-----------------------------------------------------------------------------------------------------------------------------------------------------------------------------------------------------------------------------------------------------------------------------------------------------------------------------------------------------------------------------------------------------------------------------------------------------------------------------------------------------------------------------------------------------------------------------------------------------------------------------------------------------------------------------------------------------------------------------------------------------------------------------------------------------------------------------------------------------------------------------------------------------------------------------------------------------------------------------------------------------------------------------------------------------------------------------------------------------------------------------------------------------------------------------------------------------------------------------------------------------------------------------------------------------------------------------------------------------------------------|-----------------------------------------------------------------------------------------------------------------------------------------------------------------------------------------------------------------------------------------------------------------------------------------------------------------------------------------------------------------------------------------------------------------------------------------------------------|-------------------------------------------------------------------------------------------------------------------------------------------------------------------------------------------------------------------------------------------------------------------------------------------------------------------------------------------------------------------------------------------------------------------------------------------------------------------------------------------------------------------------------------------------------------------------------------|-------------------------------------------------------------------------------------------------------------------------------------------------------------------------------------------------------------------------------------------------------------------------------------------------------------------------------------|
| <i>THBS1</i> | 2.49                  | <p>GO:0000187~activation of MAPK activity,GO:0001666~response to hypoxia,GO:0001937~negative regulation of endothelial cell proliferation,GO:0001953~negative regulation of cell-matrix adhesion,GO:0002040~sprouting angiogenesis,GO:0002544~chronic inflammatory response,GO:0002576~platelet degranulation,GO:0002581~negative regulation of antigen processing and presentation of peptide or polysaccharide antigen via MHC class II,GO:0002605~negative regulation of dendritic cell antigen processing and presentation,GO:0006954~inflammatory response,GO:0006955~immune response,GO:0006986~response to unfolded protein,GO:0007050~cell cycle arrest,GO:0007155~cell adhesion,GO:0008284~positive regulation of cell proliferation,GO:0009612~response to mechanical stimulus,GO:0009749~response to glucose,GO:0010595~positive regulation of endothelial cell migration,GO:0010596~negative regulation of endothelial cell migration,GO:0010748~negative regulation of plasma membrane long-chain fatty acid transport,GO:0010751~negative regulation of nitric oxide mediated signal transduction,GO:0010754~negative regulation of cGMP-mediated signaling,GO:0010757~negative regulation of plasminogen activation,GO:0010759~positive regulation of macrophage chemotaxis,GO:0010763~positive regulation of fibroblast migration,GO:0016477~cell</p> | <p>GO:0005576~extracellular region,GO:0005577~fibrinogen complex,GO:0005615~extracellular space,GO:0005783~endoplasmic reticulum,GO:0005788~endoplasmic reticulum lumen,GO:0009897~external side of plasma membrane,GO:0009986~cell surface,GO:0016529~sarcoplasmic reticulum,GO:0030141~secretory granule,GO:0031012~extracellular matrix,GO:0031091~platelet alpha granule,GO:0031093~platelet alpha granule lumen,GO:0070062~extracellular exosome</p> | <p>GO:0001786~phosphatidylserine binding,GO:0001948~glycoprotein binding,GO:0001968~fibronectin binding,GO:0005178~integrin binding,GO:0005509~calcium ion binding,GO:0005515~protein binding,GO:0008201~heparin binding,GO:0017134~fibroblast growth factor binding,GO:0030169~low-density lipoprotein particle binding,GO:0042802~identical protein binding,GO:0043236~laminin binding,GO:0043394~proteoglycan binding,GO:0050431~transforming growth factor beta binding,GO:0050840~extracellular matrix binding,GO:0070051~fibrinogen binding,GO:0070052~collagen V binding</p> | <p>hsa04015:Rap1 signaling pathway,hsa04115:p53 signaling pathway,hsa04145:Phagosome,hsa04151:P I3K-Akt signaling pathway,hsa04350:TGF-beta signaling pathway,hsa04510:Focal adhesion,hsa04512:ECM-receptor interaction,hsa05144:Malaria,hsa05205:Pr oteoglycans in cancer,hsa05206:MicroRNAs in cancer,hsa05219:Bladder cancer</p> |

| Gene Symbol | MPT X FPT fold change | GOTERM_BP_DIRECT                                                                                                                                                                                                                                                                                                                                                                                                                                                                                                                                                                                                                                                                                                                                                                                                                                                                                                                                                                                                                                                                                                                                                                                                                                                                                                                                                                                                                        | GOTERM_CC_DIRECT | GOTERM_MF_DIRECT | KEGG_PATHWAY |
|-------------|-----------------------|-----------------------------------------------------------------------------------------------------------------------------------------------------------------------------------------------------------------------------------------------------------------------------------------------------------------------------------------------------------------------------------------------------------------------------------------------------------------------------------------------------------------------------------------------------------------------------------------------------------------------------------------------------------------------------------------------------------------------------------------------------------------------------------------------------------------------------------------------------------------------------------------------------------------------------------------------------------------------------------------------------------------------------------------------------------------------------------------------------------------------------------------------------------------------------------------------------------------------------------------------------------------------------------------------------------------------------------------------------------------------------------------------------------------------------------------|------------------|------------------|--------------|
|             |                       | <p>migration,GO:0016525~negative regulation of angiogenesis,GO:0018149~peptide cross-linking,GO:0030194~positive regulation of blood coagulation,GO:0030198~extracellular matrix organization,GO:0030335~positive regulation of cell migration,GO:0030511~positive regulation of transforming growth factor beta receptor signaling pathway,GO:0030823~regulation of cGMP metabolic process,GO:0032026~response to magnesium ion,GO:0032570~response to progesterone,GO:0032695~negative regulation of interleukin-12 production,GO:0032914~positive regulation of transforming growth factor beta1 production,GO:0033574~response to testosterone,GO:0034605~cellular response to heat,GO:0034976~response to endoplasmic reticulum stress,GO:0036066~protein O-linked fucosylation,GO:0040037~negative regulation of fibroblast growth factor receptor signaling pathway,GO:0042327~positive regulation of phosphorylation,GO:0042493~response to drug,GO:0042535~positive regulation of tumor necrosis factor biosynthetic process,GO:0043032~positive regulation of macrophage activation,GO:0043066~negative regulation of apoptotic process,GO:0043154~negative regulation of cysteine-type endopeptidase activity involved in apoptotic process,GO:0043536~positive regulation of blood vessel endothelial cell migration,GO:0043537~negative regulation of blood vessel endothelial cell migration,GO:0043652~engulfment of</p> |                  |                  |              |

| Gene Symbol | MPT X FPT fold change | GOTERM_BP_DIRECT                                                                                                                                                                                                                                                                                                                                                                                                                                                                                                                                                                                                                                                                                                                                                                                                                                                                                                                                                                          | GOTERM_CC_DIRECT | GOTERM_MF_DIRECT | KEGG_PATHWAY |
|-------------|-----------------------|-------------------------------------------------------------------------------------------------------------------------------------------------------------------------------------------------------------------------------------------------------------------------------------------------------------------------------------------------------------------------------------------------------------------------------------------------------------------------------------------------------------------------------------------------------------------------------------------------------------------------------------------------------------------------------------------------------------------------------------------------------------------------------------------------------------------------------------------------------------------------------------------------------------------------------------------------------------------------------------------|------------------|------------------|--------------|
|             |                       | <p>apoptotic cell,GO:0045727~positive regulation of translation,GO:0045766~positive regulation of angiogenesis,GO:0048266~behavioral response to pain,GO:0048661~positive regulation of smooth muscle cell proliferation,GO:0050921~positive regulation of chemotaxis,GO:0051592~response to calcium ion,GO:0051895~negative regulation of focal adhesion assembly,GO:0051897~positive regulation of protein kinase B signaling,GO:0051918~negative regulation of fibrinolysis,GO:0071356~cellular response to tumor necrosis factor,GO:0071363~cellular response to growth factor stimulus,GO:1902043~positive regulation of extrinsic apoptotic signaling pathway via death domain receptors,GO:2000353~positive regulation of endothelial cell apoptotic process,GO:2000379~positive regulation of reactive oxygen species metabolic process,GO:2001027~negative regulation of endothelial cell chemotaxis,GO:2001237~negative regulation of extrinsic apoptotic signaling pathway</p> |                  |                  |              |



| Gene Symbol  | MPT X FPT fold change | GOTERM_BP_DIRECT                                                                                                                                                                                                                                                                                                                                                                                                                                                                                                                                                      | GOTERM_CC_DIRECT                                                                                                                                                                                                                                                                                                            | GOTERM_MF_DIRECT                                                                                                                              | KEGG_PATHWAY                                                                                                                                                                                                                                                                                        |
|--------------|-----------------------|-----------------------------------------------------------------------------------------------------------------------------------------------------------------------------------------------------------------------------------------------------------------------------------------------------------------------------------------------------------------------------------------------------------------------------------------------------------------------------------------------------------------------------------------------------------------------|-----------------------------------------------------------------------------------------------------------------------------------------------------------------------------------------------------------------------------------------------------------------------------------------------------------------------------|-----------------------------------------------------------------------------------------------------------------------------------------------|-----------------------------------------------------------------------------------------------------------------------------------------------------------------------------------------------------------------------------------------------------------------------------------------------------|
| <i>MCCC2</i> | 2.42                  | GO:0006552~leucine catabolic process,GO:0006768~biotin metabolic process,GO:0009083~branched-chain amino acid catabolic process,GO:0015936~coenzyme A metabolic process,GO:0051291~protein heterooligomerization                                                                                                                                                                                                                                                                                                                                                      | GO:0002169~3-methylcrotonyl-CoA carboxylase complex, mitochondrial,GO:0005739~mitochondrion,GO:0005759~mitochondrial matrix,GO:0005829~cytosol,GO:1905202~methylcrotonyl-CoA carboxylase complex                                                                                                                            | GO:0004485~methylcrotonyl-CoA carboxylase activity,GO:0005515~protein binding,GO:0005524~ATP binding,GO:0016874~ligase activity               | hsa00280:Valine, leucine and isoleucine degradation,hsa01100:Metabolic pathways                                                                                                                                                                                                                     |
| <i>HSPA2</i> | 2.32                  | GO:0006986~response to unfolded protein,GO:0007140~male meiosis,GO:0007141~male meiosis I,GO:0007283~spermatogenesis,GO:0007286~spermatid development,GO:0009408~response to heat,GO:0009409~response to cold,GO:0031662~positive regulation of cyclin-dependent protein serine/threonine kinase activity involved in G2/M transition of mitotic cell cycle,GO:0042026~protein refolding,GO:0070194~synaptonemal complex disassembly,GO:0090084~negative regulation of inclusion body assembly,GO:1901896~positive regulation of calcium-transporting ATPase activity | GO:0000795~synaptonemal complex,GO:0001673~male germ cell nucleus,GO:0005634~nucleus,GO:0005739~mitochondrion,GO:0005829~cytosol,GO:0009986~cell surface,GO:0016020~membrane,GO:0036128~CatSper complex,GO:0043209~myelin sheath,GO:0070062~extracellular exosome,GO:0072562~blood microparticle,GO:0072687~meiotic spindle | GO:0005515~protein binding,GO:0005524~ATP binding,GO:0019899~enzyme binding,GO:0051082~unfolded protein binding,GO:0051861~glycolipid binding | hsa03040:Spliceosome,hsa04010:MAPK signaling pathway,hsa04141:Protein processing in endoplasmic reticulum,hsa04144:Endocytosis,hsa04612:Antigen processing and presentation,hsa04915:Estrogen signaling pathway,hsa05134:Legionellosis,hsa05145:Toxoplasmosis,hsa05162:Measles,hsa05164:Influenza A |
| <i>IARS2</i> | 2.07                  | GO:0006418~tRNA aminoacylation for protein translation,GO:0006428~isoleucyl-tRNA aminoacylation,GO:0006450~regulation of translational fidelity                                                                                                                                                                                                                                                                                                                                                                                                                       | GO:0005737~cytoplasm,GO:0005739~mitochondrion,GO:0005759~mitochondrial matrix,GO:0005829~cytosol,GO:0016021~integral component of membrane                                                                                                                                                                                  | GO:0000049~tRNA binding,GO:0002161~aminoacyl-tRNA editing activity,GO:0004822~isoleucine-tRNA ligase activity,GO:0005524~ATP binding          | hsa00970:Aminoacyl-tRNA biosynthesis                                                                                                                                                                                                                                                                |

| Gene Symbol   | MPT X FPT fold change | GOTERM_BP_DIRECT                                                                                                                                                                                                                                                                                                             | GOTERM_CC_DIRECT                                                                                                                                                                                                                                                                                                                          | GOTERM_MF_DIRECT                                                                                                                                             | KEGG_PATHWAY                                         |
|---------------|-----------------------|------------------------------------------------------------------------------------------------------------------------------------------------------------------------------------------------------------------------------------------------------------------------------------------------------------------------------|-------------------------------------------------------------------------------------------------------------------------------------------------------------------------------------------------------------------------------------------------------------------------------------------------------------------------------------------|--------------------------------------------------------------------------------------------------------------------------------------------------------------|------------------------------------------------------|
| <i>CYB5R1</i> | 2.05                  | GO:0002576~platelet degranulation,GO:0015701~bicarbonate transport,GO:0016126~sterol biosynthetic process,GO:0055114~oxidation-reduction process,GO:1903955~positive regulation of protein targeting to mitochondrion                                                                                                        | GO:0005739~mitochondrion,GO:0005789~endoplasmic reticulum membrane,GO:0005886~plasma membrane,GO:0016020~membrane,GO:0016021~integral component of membrane,GO:0031092~platelet alpha granule membrane,GO:0070062~extracellular exosome                                                                                                   | GO:0004128~cytochrome-b5 reductase activity, acting on NAD(P)H,GO:0005515~protein binding,GO:0016491~oxidoreductase activity,GO:0071949~FAD binding          | hsa00520:Amino sugar and nucleotide sugar metabolism |
| <i>USO1</i>   | 2.04                  | GO:0006886~intracellular protein transport,GO:0006888~ER to Golgi vesicle-mediated transport,GO:0007030~Golgi organization,GO:0045056~transcytosis,GO:0048208~COPII vesicle coating,GO:0048211~Golgi vesicle docking,GO:0048280~vesicle fusion with Golgi apparatus,GO:0061025~membrane fusion,GO:0098609~cell-cell adhesion | GO:0000139~Golgi membrane,GO:0005730~nucleolus,GO:0005783~endoplasmic reticulum,GO:0005794~Golgi apparatus,GO:0005795~Golgi stack,GO:0005829~cytosol,GO:0005913~cell-cell adherens junction,GO:0012507~ER to Golgi transport vesicle membrane,GO:0016020~membrane,GO:0030133~transport vesicle,GO:0048471~perinuclear region of cytoplasm | GO:0005515~protein binding,GO:0008565~protein transporter activity,GO:0044822~poly(A) RNA binding,GO:0098641~cadherin binding involved in cell-cell adhesion |                                                      |

| Gene Symbol  | MPT X FPT fold change | GOTERM_BP_DIRECT                                                                                                                                                                                                                                                                                                                                                                                                                                                                                                                                                          | GOTERM_CC_DIRECT                                                                                                                                                                                                                               | GOTERM_MF_DIRECT                                                                                                                                                                                                                                             | KEGG_PATHWAY                                                                                                   |
|--------------|-----------------------|---------------------------------------------------------------------------------------------------------------------------------------------------------------------------------------------------------------------------------------------------------------------------------------------------------------------------------------------------------------------------------------------------------------------------------------------------------------------------------------------------------------------------------------------------------------------------|------------------------------------------------------------------------------------------------------------------------------------------------------------------------------------------------------------------------------------------------|--------------------------------------------------------------------------------------------------------------------------------------------------------------------------------------------------------------------------------------------------------------|----------------------------------------------------------------------------------------------------------------|
| <i>HACD3</i> | 2.00                  | GO:0007249~I-kappaB kinase/NF-kappaB signaling,GO:0007257~activation of JUN kinase activity,GO:0007264~small GTPase mediated signal transduction,GO:0007266~Rho protein signal transduction,GO:0016601~Rac protein signal transduction,GO:0030148~sphingolipid biosynthetic process,GO:0030497~fatty acid elongation,GO:0042761~very long-chain fatty acid biosynthetic process,GO:0043547~positive regulation of GTPase activity,GO:0045070~positive regulation of viral genome replication,GO:0046726~positive regulation by virus of viral protein levels in host cell | GO:0005737~cytoplasm,GO:0005739~mitochondrion,GO:0005783~endoplasmic reticulum,GO:0005925~focal adhesion,GO:0016021~integral component of membrane,GO:0030176~integral component of endoplasmic reticulum membrane,GO:0031965~nuclear membrane | GO:0005096~GTPase activator activity,GO:0005515~protein binding,GO:0018812~3-hydroxyacyl-CoA dehydratase activity,GO:0019899~enzyme binding,GO:0102344~3-hydroxy-behenoyl-CoA dehydratase activity,GO:0102345~3-hydroxy-lignoceroyl-CoA dehydratase activity | hsa00062:Fatty acid elongation,hsa01040:Biosynthesis of unsaturated fatty acids,hsa01212:Fatty acid metabolism |

| Gene Symbol     | MPT X FPT fold change | GOTERM_BP_DIRECT                                                                                                                                                                                                                                                                                                                                                                                                                                                                                                                                                                                                                                                                                                                                                                                                                                                                                                                                                                                                                                                                                                                                                                                                                                                                                                                                                                                                                                                       | GOTERM_CC_DIRECT                                                                                                                                                                                                                                                                                                                                                                                                                                                                                                                                                                                               | GOTERM_MF_DIRECT                                                                                                                                                                                                                                                                                                                                                                                                                                  | KEGG_PATHWAY |
|-----------------|-----------------------|------------------------------------------------------------------------------------------------------------------------------------------------------------------------------------------------------------------------------------------------------------------------------------------------------------------------------------------------------------------------------------------------------------------------------------------------------------------------------------------------------------------------------------------------------------------------------------------------------------------------------------------------------------------------------------------------------------------------------------------------------------------------------------------------------------------------------------------------------------------------------------------------------------------------------------------------------------------------------------------------------------------------------------------------------------------------------------------------------------------------------------------------------------------------------------------------------------------------------------------------------------------------------------------------------------------------------------------------------------------------------------------------------------------------------------------------------------------------|----------------------------------------------------------------------------------------------------------------------------------------------------------------------------------------------------------------------------------------------------------------------------------------------------------------------------------------------------------------------------------------------------------------------------------------------------------------------------------------------------------------------------------------------------------------------------------------------------------------|---------------------------------------------------------------------------------------------------------------------------------------------------------------------------------------------------------------------------------------------------------------------------------------------------------------------------------------------------------------------------------------------------------------------------------------------------|--------------|
| <i>SLC9A3R1</i> | 1.90                  | <p>GO:0003096~renal sodium ion transport,GO:0006461~protein complex assembly,GO:0007191~adenylate cyclase-activating dopamine receptor signaling pathway,GO:0007605~sensory perception of sound,GO:0008285~negative regulation of cell proliferation,GO:0008360~regulation of cell shape,GO:0008361~regulation of cell size,GO:0010642~negative regulation of platelet-derived growth factor receptor signaling pathway,GO:0014067~negative regulation of phosphatidylinositol 3-kinase signaling,GO:0016055~Wnt signaling pathway,GO:0019933~cAMP-mediated signaling,GO:0022612~gland morphogenesis,GO:0030033~microvillus assembly,GO:0030036~actin cytoskeleton organization,GO:0030336~negative regulation of cell migration,GO:0030643~cellular phosphate ion homeostasis,GO:0032415~regulation of sodium:proton antiporter activity,GO:0032416~negative regulation of sodium:proton antiporter activity,GO:0032782~bile acid secretion,GO:0034635~glutathione transport,GO:0035414~negative regulation of catenin import into nucleus,GO:0040023~establishment of nucleus localization,GO:0044062~regulation of excretion,GO:0045198~establishment of epithelial cell apical/basal polarity,GO:0045859~regulation of protein kinase activity,GO:0045930~negative regulation of mitotic cell cycle,GO:0051683~establishment of Golgi localization,GO:0051898~negative regulation of protein kinase B signaling,GO:0060088~auditory receptor cell stereocilium</p> | <p>GO:0001726~ruffle,GO:0005634~nucleus,GO:0005737~cytoplasm,GO:0005813~centrosome,GO:0005886~plasma membrane,GO:0005902~microvillus,GO:0012505~endomembrane system,GO:0015629~actin cytoskeleton,GO:0016020~membrane,GO:0016324~apical plasma membrane,GO:0030175~filopodium,GO:0031526~brush border membrane,GO:0031528~microvillus membrane,GO:0031982~vesicle,GO:0032426~stereocilium tip,GO:0043231~intracellular membrane-bounded organelle,GO:0045121~membrane raft,GO:0048471~perinuclear region of cytoplasm,GO:0070062~extracellular exosome,GO:0071944~cell periphery,GO:0097225~sperm midpiece</p> | <p>GO:0005102~receptor binding,GO:0005515~protein binding,GO:0008013~beta-catenin binding,GO:0017081~chloride channel regulator activity,GO:0019902~phosphatase binding,GO:0030165~PDZ domain binding,GO:0031698~beta-2 adrenergic receptor binding,GO:0032403~protein complex binding,GO:0032947~protein complex scaffold,GO:0043621~protein self-association,GO:0050780~dopamine receptor binding,GO:0070851~growth factor receptor binding</p> |              |

| Gene Symbol | MPT X FPT fold change | GOTERM_BP_DIRECT                                                                                                                                                                                                                                                                                                                                                        | GOTERM_CC_DIRECT | GOTERM_MF_DIRECT | KEGG_PATHWAY |
|-------------|-----------------------|-------------------------------------------------------------------------------------------------------------------------------------------------------------------------------------------------------------------------------------------------------------------------------------------------------------------------------------------------------------------------|------------------|------------------|--------------|
|             |                       | <p>organization,GO:0060158~phospholipase C-activating dopamine receptor signaling pathway,GO:0070293~renal absorption,GO:0070373~negative regulation of ERK1 and ERK2 cascade,GO:0090002~establishment of protein localization to plasma membrane,GO:0097291~renal phosphate ion absorption,GO:2001244~positive regulation of intrinsic apoptotic signaling pathway</p> |                  |                  |              |

| Gene Symbol | MPT X FPT fold change | GOTERM_BP_DIRECT                                                                                                                                                                                                                        | GOTERM_CC_DIRECT    | GOTERM_MF_DIRECT                                                                                                                                                                                    | KEGG_PATHWAY |
|-------------|-----------------------|-----------------------------------------------------------------------------------------------------------------------------------------------------------------------------------------------------------------------------------------|---------------------|-----------------------------------------------------------------------------------------------------------------------------------------------------------------------------------------------------|--------------|
| <i>USP5</i> | 1.83                  | GO:0006511~ubiquitin-dependent protein catabolic process,GO:0016579~protein deubiquitination,GO:0032436~positive regulation of proteasomal ubiquitin-dependent protein catabolic process,GO:0071108~protein K48-linked deubiquitination | GO:0005764~lysosome | GO:0004197~cysteine-type endopeptidase activity,GO:0004843~thiol-dependent ubiquitin-specific protease activity,GO:0005515~protein binding,GO:0008270~zinc ion binding,GO:0043130~ubiquitin binding |              |

| Gene Symbol | MPT X FPT fold change | GOTERM_BP_DIRECT                                                                                                                                                                                                                                                                                                                                                                                                                                                                                                                                                                                                                                                                                                                                                                                                                                                                                                                                                                     | GOTERM_CC_DIRECT                                                                                                                                                                                                                                                                        | GOTERM_MF_DIRECT                                                                                                                                                                                                                                                                                                | KEGG_PATHWAY |
|-------------|-----------------------|--------------------------------------------------------------------------------------------------------------------------------------------------------------------------------------------------------------------------------------------------------------------------------------------------------------------------------------------------------------------------------------------------------------------------------------------------------------------------------------------------------------------------------------------------------------------------------------------------------------------------------------------------------------------------------------------------------------------------------------------------------------------------------------------------------------------------------------------------------------------------------------------------------------------------------------------------------------------------------------|-----------------------------------------------------------------------------------------------------------------------------------------------------------------------------------------------------------------------------------------------------------------------------------------|-----------------------------------------------------------------------------------------------------------------------------------------------------------------------------------------------------------------------------------------------------------------------------------------------------------------|--------------|
| VAPB        | 1.78                  | <p>GO:0006874~cellular calcium ion homeostasis,GO:0006888~ER to Golgi vesicle-mediated transport,GO:0006987~activation of signaling protein activity involved in unfolded protein response,GO:0007029~endoplasmic reticulum organization,GO:0019048~modulation by virus of host morphology or physiology,GO:0030148~sphingolipid biosynthetic process,GO:0030968~endoplasmic reticulum unfolded protein response,GO:0044790~negative regulation by host of viral release from host cell,GO:0044791~positive regulation by host of viral release from host cell,GO:0044828~negative regulation by host of viral genome replication,GO:0044829~positive regulation by host of viral genome replication,GO:0044830~modulation by host of viral RNA genome replication,GO:0045070~positive regulation of viral genome replication,GO:0046725~negative regulation by virus of viral protein levels in host cell,GO:0090114~COPII-coated vesicle budding,GO:0098609~cell-cell adhesion</p> | <p>GO:0000139~Golgi membrane,GO:0005737~cytoplasm,GO:0005783~endoplasmic reticulum,GO:0005789~endoplasmic reticulum membrane,GO:0005794~Golgi apparatus,GO:0005913~cell-cell adherens junction,GO:0016021~integral component of membrane,GO:0070971~endoplasmic reticulum exit site</p> | <p>GO:0005515~protein binding,GO:0008017~microtubule binding,GO:0019899~enzyme binding,GO:0033149~FFAT motif binding,GO:0042803~protein homodimerization activity,GO:0046982~protein heterodimerization activity,GO:0048487~beta-tubulin binding,GO:0098641~cadherin binding involved in cell-cell adhesion</p> |              |

| Gene Symbol    | MPT X FPT fold change | GOTERM_BP_DIRECT                                                                                                                                                                                                                                                                                                                                                                                                                                                                                                                                                                                                                                                | GOTERM_CC_DIRECT                                                                                                                                                                                                                                                       | GOTERM_MF_DIRECT                                                                                                                                                                                                                                                                                                                                                                       | KEGG_PATHWAY                                                                                                 |
|----------------|-----------------------|-----------------------------------------------------------------------------------------------------------------------------------------------------------------------------------------------------------------------------------------------------------------------------------------------------------------------------------------------------------------------------------------------------------------------------------------------------------------------------------------------------------------------------------------------------------------------------------------------------------------------------------------------------------------|------------------------------------------------------------------------------------------------------------------------------------------------------------------------------------------------------------------------------------------------------------------------|----------------------------------------------------------------------------------------------------------------------------------------------------------------------------------------------------------------------------------------------------------------------------------------------------------------------------------------------------------------------------------------|--------------------------------------------------------------------------------------------------------------|
| <i>SH3BGRL</i> | 1.72                  | GO:0009967~positive regulation of signal transduction                                                                                                                                                                                                                                                                                                                                                                                                                                                                                                                                                                                                           | GO:0005615~extracellular space,GO:0005634~nucleus,GO:0005737~cytoplasm,GO:0070062~extracellular exosome                                                                                                                                                                | GO:0005070~SH3/SH2 adaptor activity,GO:0017124~SH3 domain binding                                                                                                                                                                                                                                                                                                                      |                                                                                                              |
| <i>TTL12</i>   | 1.71                  | GO:0006464~cellular protein modification process                                                                                                                                                                                                                                                                                                                                                                                                                                                                                                                                                                                                                |                                                                                                                                                                                                                                                                        | GO:0005524~ATP binding,GO:0016874~ligase activity                                                                                                                                                                                                                                                                                                                                      |                                                                                                              |
| <i>NSF</i>     | 1.70                  | GO:0001921~positive regulation of receptor recycling,GO:0006813~potassium ion transport,GO:0006886~intracellular protein transport,GO:0006887~exocytosis,GO:0006888~ER to Golgi vesicle-mediated transport,GO:0006890~retrograde vesicle-mediated transport, Golgi to ER,GO:0006891~intra-Golgi vesicle-mediated transport,GO:0016192~vesicle-mediated transport,GO:0017157~regulation of exocytosis,GO:0035494~SNARE complex disassembly,GO:0043001~Golgi to plasma membrane protein transport,GO:0045026~plasma membrane fusion,GO:0045732~positive regulation of protein catabolic process,GO:0048208~COPII vesicle coating,GO:0048211~Golgi vesicle docking | GO:0000139~Golgi membrane,GO:0005737~cytoplasm,GO:0005765~lysosomal membrane,GO:0005795~Golgi stack,GO:0005829~cytosol,GO:0005886~plasma membrane,GO:0014069~postsynaptic density,GO:0043198~dendritic shaft,GO:0043209~myelin sheath,GO:0070062~extracellular exosome | GO:0000149~SNARE binding,GO:0005515~protein binding,GO:0005524~ATP binding,GO:0016887~ATPase activity,GO:0017075~syntaxin-1 binding,GO:0017137~Rab GTPase binding,GO:0019901~protein kinase binding,GO:0030165~PDZ domain binding,GO:0032403~protein complex binding,GO:0035255~ionotropic glutamate receptor binding,GO:0042623~ATPase activity, coupled,GO:0046872~metal ion binding | hsa04721:Synaptic vesicle cycle,hsa04727:GABAergic synapse,hsa04962:Vasopressin-regulated water reabsorption |



| Gene Symbol   | MPT X FPT fold change | GOTERM_BP_DIRECT                                                                                                                                                                                                                                                                                                                  | GOTERM_CC_DIRECT                                                                                                                                                                                             | GOTERM_MF_DIRECT                                                                                                                              | KEGG_PATHWAY                                                         |
|---------------|-----------------------|-----------------------------------------------------------------------------------------------------------------------------------------------------------------------------------------------------------------------------------------------------------------------------------------------------------------------------------|--------------------------------------------------------------------------------------------------------------------------------------------------------------------------------------------------------------|-----------------------------------------------------------------------------------------------------------------------------------------------|----------------------------------------------------------------------|
| <i>CACYBP</i> | 1.70                  | GO:0007568~aging,GO:0045740~positive regulation of DNA replication,GO:0055007~cardiac muscle cell differentiation,GO:0060416~response to growth hormone,GO:0060548~negative regulation of cell death,GO:0071277~cellular response to calcium ion                                                                                  | GO:0005641~nuclear envelope lumen,GO:0005654~nucleoplasm,GO:0005737~cytoplasm,GO:0030877~beta-catenin destruction complex,GO:0043005~neuron projection,GO:0044297~cell body,GO:0070062~extracellular exosome | GO:0005515~protein binding,GO:0042803~protein homodimerization activity                                                                       | hsa04310:Wnt signaling pathway                                       |
| <i>EFHD1</i>  | 1.70                  | GO:0031175~neuron projection development                                                                                                                                                                                                                                                                                          | GO:0005743~mitochondrial inner membrane,GO:0070062~extracellular exosome                                                                                                                                     | GO:0005509~calcium ion binding                                                                                                                |                                                                      |
| <i>CESI</i>   | 1.66                  | GO:0006695~cholesterol biosynthetic process,GO:0006805~xenobiotic metabolic process,GO:0008152~metabolic process,GO:0009636~response to toxic substance,GO:0030855~epithelial cell differentiation,GO:0051791~medium-chain fatty acid metabolic process,GO:0090122~cholesterol ester hydrolysis involved in cholesterol transport | GO:0005615~extracellular space,GO:0005788~endoplasmic reticulum lumen,GO:0005829~cytosol                                                                                                                     | GO:0004771~sterol esterase activity,GO:0047374~methylumbelliferyl-acetate deacetylase activity,GO:0052689~carboxylic ester hydrolase activity | hsa00983:Drug metabolism - other enzymes,hsa01100:Metabolic pathways |

| Gene Symbol   | MPT X FPT fold change | GOTERM_BP_DIRECT                                                                                                                                                                                                                                                        | GOTERM_CC_DIRECT                                                                                                                                                                                                                                                                                                                                                                                                                              | GOTERM_MF_DIRECT                                                                                                                                                                                                                                                    | KEGG_PATHWAY                                                                                                                                   |
|---------------|-----------------------|-------------------------------------------------------------------------------------------------------------------------------------------------------------------------------------------------------------------------------------------------------------------------|-----------------------------------------------------------------------------------------------------------------------------------------------------------------------------------------------------------------------------------------------------------------------------------------------------------------------------------------------------------------------------------------------------------------------------------------------|---------------------------------------------------------------------------------------------------------------------------------------------------------------------------------------------------------------------------------------------------------------------|------------------------------------------------------------------------------------------------------------------------------------------------|
| <i>LMAN2</i>  | 1.65                  | GO:0006888~ER to Golgi vesicle-mediated transport,GO:0006890~retrograde vesicle-mediated transport, Golgi to ER,GO:0007029~endoplasmic reticulum organization,GO:0007030~Golgi organization,GO:0015031~protein transport,GO:0050766~positive regulation of phagocytosis | GO:0000139~Golgi membrane,GO:0005615~extracellular space,GO:0005789~endoplasmic reticulum membrane,GO:0005793~endoplasmic reticulum-Golgi intermediate compartment,GO:0005794~Golgi apparatus,GO:0005887~integral component of plasma membrane,GO:0009986~cell surface,GO:0016020~membrane,GO:0030134~ER to Golgi transport vesicle,GO:0033116~endoplasmic reticulum-Golgi intermediate compartment membrane,GO:0070062~extracellular exosome | GO:0001948~glycoprotein binding,GO:0005537~mannose binding,GO:0030246~carbohydrate binding,GO:0031072~heat shock protein binding,GO:0046872~metal ion binding                                                                                                       | hsa04141:Protein processing in endoplasmic reticulum                                                                                           |
| <i>ACADSB</i> | 1.64                  | GO:0006631~fatty acid metabolic process,GO:0009083~branched-chain amino acid catabolic process,GO:0033539~fatty acid beta-oxidation using acyl-CoA dehydrogenase,GO:0055088~lipid homeostasis                                                                           | GO:0005739~mitochondrion,GO:0005759~mitochondrial matrix,GO:0070062~extracellular exosome                                                                                                                                                                                                                                                                                                                                                     | GO:0000062~fatty-acyl-CoA binding,GO:0003995~acyl-CoA dehydrogenase activity,GO:0009055~electron carrier activity,GO:0050660~flavin adenine dinucleotide binding,GO:0052890~oxidoreductase activity, acting on the CH-CH group of donors, with a flavin as acceptor | hsa00071:Fatty acid degradation,hsa00280:Valine, leucine and isoleucine degradation,hsa01100:Metabolic pathways,hsa01212:Fatty acid metabolism |

| Gene Symbol   | MPT X FPT fold change | GOTERM_BP_DIRECT                                                                                                                                                                                                                                                                                                                                                                                                                                                                                                                                                                                                                                                                                                                                                                                                                                                                                                                                                                                                                                                                                                                                                                                                                                                                                                                                                                                     | GOTERM_CC_DIRECT                                                                                                                                                                                                                                                                                                                                                                                                                                                                                                                                                                                                                         | GOTERM_MF_DIRECT                                                                                                                                                                                                                                                                                                                                                                                                                                                                                                          | KEGG_PATHWAY                                                                                                                                                                                                                                                                                                                                                                                                                                                                                                                                                                                                                                                                          |
|---------------|-----------------------|------------------------------------------------------------------------------------------------------------------------------------------------------------------------------------------------------------------------------------------------------------------------------------------------------------------------------------------------------------------------------------------------------------------------------------------------------------------------------------------------------------------------------------------------------------------------------------------------------------------------------------------------------------------------------------------------------------------------------------------------------------------------------------------------------------------------------------------------------------------------------------------------------------------------------------------------------------------------------------------------------------------------------------------------------------------------------------------------------------------------------------------------------------------------------------------------------------------------------------------------------------------------------------------------------------------------------------------------------------------------------------------------------|------------------------------------------------------------------------------------------------------------------------------------------------------------------------------------------------------------------------------------------------------------------------------------------------------------------------------------------------------------------------------------------------------------------------------------------------------------------------------------------------------------------------------------------------------------------------------------------------------------------------------------------|---------------------------------------------------------------------------------------------------------------------------------------------------------------------------------------------------------------------------------------------------------------------------------------------------------------------------------------------------------------------------------------------------------------------------------------------------------------------------------------------------------------------------|---------------------------------------------------------------------------------------------------------------------------------------------------------------------------------------------------------------------------------------------------------------------------------------------------------------------------------------------------------------------------------------------------------------------------------------------------------------------------------------------------------------------------------------------------------------------------------------------------------------------------------------------------------------------------------------|
| <i>ATPIA1</i> | 1.59                  | <p>GO:0002026~regulation of the force of heart contraction,GO:0002028~regulation of sodium ion transport,GO:0006883~cellular sodium ion homeostasis,GO:0008217~regulation of blood pressure,GO:0010107~potassium ion import,GO:0010248~establishment or maintenance of transmembrane electrochemical gradient,GO:0015991~ATP hydrolysis coupled proton transport,GO:0016311~dephosphorylation,GO:0030007~cellular potassium ion homeostasis,GO:0031947~negative regulation of glucocorticoid biosynthetic process,GO:0034220~ion transmembrane transport,GO:0036376~sodium ion export from cell,GO:0042493~response to drug,GO:0045822~negative regulation of heart contraction,GO:0045823~positive regulation of heart contraction,GO:0045989~positive regulation of striated muscle contraction,GO:0055119~relaxation of cardiac muscle,GO:0060048~cardiac muscle contraction,GO:0060081~membrane hyperpolarization,GO:0071260~cellular response to mechanical stimulus,GO:0071383~cellular response to steroid hormone stimulus,GO:0086002~cardiac muscle cell action potential involved in contraction,GO:0086004~regulation of cardiac muscle cell contraction,GO:0086009~membrane repolarization,GO:0086013~membrane repolarization during cardiac muscle cell action potential,GO:0086064~cell communication by electrical coupling involved in cardiac conduction,GO:1903416~response to</p> | <p>GO:0005768~endosome,GO:0005783~endoplasmic reticulum,GO:0005794~Golgi apparatus,GO:0005886~plasma membrane,GO:0005890~sodium:potassium-exchanging ATPase complex,GO:0005901~caveola,GO:0014069~postsynaptic density,GO:0014704~intercalated disc,GO:0016020~membrane,GO:0016021~integral component of membrane,GO:0016323~basolateral plasma membrane,GO:0016324~apical plasma membrane,GO:0030315~T-tubule,GO:0042383~sarcolemma,GO:0042470~melanosome,GO:0043209~myelin sheath,GO:0043231~intracellular membrane-bounded organelle,GO:0043234~protein complex,GO:0070062~extracellular exosome,GO:1903561~extracellular vesicle</p> | <p>GO:0000166~nucleotide binding,GO:0005391~sodium:potassium-exchanging ATPase activity,GO:0005515~protein binding,GO:0005524~ATP binding,GO:0016791~phosphatase activity,GO:0019901~protein kinase binding,GO:0019904~protein domain specific binding,GO:0030506~ankyrin binding,GO:0030955~potassium ion binding,GO:0031402~sodium ion binding,GO:0043531~ADP binding,GO:0043548~phosphatidylinositol 3-kinase binding,GO:0046872~metal ion binding,GO:0051087~chaperone binding,GO:1990239~steroid hormone binding</p> | <p>hsa04022:cGMP-PKG signaling pathway,hsa04024:cAMP signaling pathway,hsa04260:Cardiac muscle contraction,hsa04261:Adrenergic signaling in cardiomyocytes,hsa04911:Insulin secretion,hsa04918:Thyroid hormone synthesis,hsa04919:Thyroid hormone signaling pathway,hsa04960:Aldosterone-regulated sodium reabsorption,hsa04961:Endocrine and other factor-regulated calcium reabsorption,hsa04964:Proximal tubule bicarbonate reclamation,hsa04970:Salivary secretion,hsa04971:Gastric acid secretion,hsa04972:Pancreatic secretion,hsa04973:Carbohydrate digestion and absorption,hsa04974:Protein digestion and absorption,hsa04976:Bile secretion,hsa04978:Mineral absorption</p> |

| Gene Symbol | MPT X FPT fold change | GOTERM_BP_DIRECT                                                                                             | GOTERM_CC_DIRECT | GOTERM_MF_DIRECT | KEGG_PATHWAY |
|-------------|-----------------------|--------------------------------------------------------------------------------------------------------------|------------------|------------------|--------------|
|             |                       | glycoside,GO:1903779~regulation of cardiac conduction,GO:1990573~potassium ion import across plasma membrane |                  |                  |              |

| Gene Symbol   | MPT X FPT fold change | GOTERM_BP_DIRECT                                                                                                                                                                                                                                                                                                                                                                      | GOTERM_CC_DIRECT                                                                                                                                                                                                                                                                                      | GOTERM_MF_DIRECT                                                                            | KEGG_PATHWAY                                                                 |
|---------------|-----------------------|---------------------------------------------------------------------------------------------------------------------------------------------------------------------------------------------------------------------------------------------------------------------------------------------------------------------------------------------------------------------------------------|-------------------------------------------------------------------------------------------------------------------------------------------------------------------------------------------------------------------------------------------------------------------------------------------------------|---------------------------------------------------------------------------------------------|------------------------------------------------------------------------------|
| <i>PALLD</i>  | 1.56                  | GO:0003334~keratinocyte development,GO:0003382~epithelial cell morphogenesis,GO:0007010~cytoskeleton organization,GO:0016477~cell migration,GO:0030036~actin cytoskeleton organization                                                                                                                                                                                                | GO:0001726~ruffle,GO:0002102~podosome,GO:0005634~nucleus,GO:0005737~cytoplasm,GO:0005739~mitochondrion,GO:0005884~actin filament,GO:0005886~plasma membrane,GO:0005925~focal adhesion,GO:0015629~actin cytoskeleton,GO:0030018~Z disc,GO:0030027~lamellipodium,GO:0030424~axon,GO:0030426~growth cone | GO:0003779~actin binding,GO:0005515~protein binding,GO:0051371~muscle alpha-actinin binding |                                                                              |
| <i>GOLT1B</i> | 1.56                  | GO:0007165~signal transduction,GO:0015031~protein transport,GO:0016192~vesicle-mediated transport,GO:0043123~positive regulation of I-kappaB kinase/NF-kappaB signaling                                                                                                                                                                                                               | GO:0000139~Golgi membrane,GO:0005783~endoplasmic reticulum,GO:0016020~membrane,GO:0016021~integral component of membrane                                                                                                                                                                              | GO:0004871~signal transducer activity                                                       |                                                                              |
| <i>SEC63</i>  | 1.55                  | GO:0001889~liver development,GO:0006612~protein targeting to membrane,GO:0006614~SRP-dependent cotranslational protein targeting to membrane,GO:0006620~posttranslational protein targeting to membrane,GO:0006807~nitrogen compound metabolic process,GO:0010259~multicellular organism aging,GO:0036498~IRE1-mediated unfolded protein response,GO:0072001~renal system development | GO:0005622~intracellular,GO:0005783~endoplasmic reticulum,GO:0005789~endoplasmic reticulum membrane,GO:0005829~cytosol,GO:0016020~membrane,GO:0016021~integral component of membrane                                                                                                                  | GO:0004872~receptor activity,GO:0005515~protein binding,GO:0044822~poly(A) RNA binding      | hsa03060:Protein export,hsa04141:Protein processing in endoplasmic reticulum |

| Gene Symbol | MPT X FPT fold change | GOTERM_BP_DIRECT                                                                                                                                                                                                                                                                                                                                                                                                                                                                                                                                                                                                                                                                                                                                        | GOTERM_CC_DIRECT                                                                                    | GOTERM_MF_DIRECT                                                                                                                                            | KEGG_PATHWAY         |
|-------------|-----------------------|---------------------------------------------------------------------------------------------------------------------------------------------------------------------------------------------------------------------------------------------------------------------------------------------------------------------------------------------------------------------------------------------------------------------------------------------------------------------------------------------------------------------------------------------------------------------------------------------------------------------------------------------------------------------------------------------------------------------------------------------------------|-----------------------------------------------------------------------------------------------------|-------------------------------------------------------------------------------------------------------------------------------------------------------------|----------------------|
| <i>AGR2</i> | 1.51                  | GO:0010628~positive regulation of gene expression,GO:0010811~positive regulation of cell-substrate adhesion,GO:0030154~cell differentiation,GO:0034976~response to endoplasmic reticulum stress,GO:0045742~positive regulation of epidermal growth factor receptor signaling pathway,GO:0048546~digestive tract morphogenesis,GO:0048639~positive regulation of developmental growth,GO:0060480~lung goblet cell differentiation,GO:0060548~negative regulation of cell death,GO:0070254~mucus secretion,GO:0090004~positive regulation of establishment of protein localization to plasma membrane,GO:1903896~positive regulation of IRE1-mediated unfolded protein response,GO:1903899~positive regulation of PERK-mediated unfolded protein response | GO:0005615~extracellular space,GO:0005739~mitochondrion,GO:0005783~endoplasmic reticulum            | GO:0002162~dystroglycan binding,GO:0005154~epidermal growth factor receptor binding,GO:0005515~protein binding,GO:0042803~protein homodimerization activity |                      |
| <i>ECH1</i> | -1.51                 | GO:0006635~fatty acid beta-oxidation,GO:0008152~metabolic process,GO:0009062~fatty acid catabolic process                                                                                                                                                                                                                                                                                                                                                                                                                                                                                                                                                                                                                                               | GO:0005739~mitochondrion,GO:0005777~peroxisome,GO:0016020~membrane,GO:0070062~extracellular exosome | GO:0003824~catalytic activity,GO:0005102~receptor binding,GO:0005515~protein binding,GO:0016853~isomerase activity                                          | hsa04146: Peroxisome |

| Gene Symbol   | MPT X FPT fold change | GOTERM_BP_DIRECT                                                                                                                                                                                                                                                                                                                     | GOTERM_CC_DIRECT                                                                                                                                                                                                                                          | GOTERM_MF_DIRECT                                                                                                                                                                                         | KEGG_PATHWAY |
|---------------|-----------------------|--------------------------------------------------------------------------------------------------------------------------------------------------------------------------------------------------------------------------------------------------------------------------------------------------------------------------------------|-----------------------------------------------------------------------------------------------------------------------------------------------------------------------------------------------------------------------------------------------------------|----------------------------------------------------------------------------------------------------------------------------------------------------------------------------------------------------------|--------------|
| <i>TTR</i>    | -1.57                 | GO:0001523~retinoid metabolic process,GO:0006144~purine nucleobase metabolic process,GO:0006810~transport,GO:0030198~extracellular matrix organization,GO:0042572~retinol metabolic process,GO:0044267~cellular protein metabolic process,GO:0070327~thyroid hormone transport                                                       | GO:0005576~extracellular region,GO:0005615~extracellular space,GO:0005737~cytoplasm,GO:0043234~protein complex,GO:0070062~extracellular exosome                                                                                                           | GO:0005179~hormone activity,GO:0005515~protein binding,GO:0042562~hormone binding,GO:0042802~identical protein binding,GO:0046982~protein heterodimerization activity,GO:0070324~thyroid hormone binding |              |
| <i>ERLIN2</i> | -1.59                 | GO:0008203~cholesterol metabolic process,GO:0018108~peptidyl-tyrosine phosphorylation,GO:0030433~ER-associated ubiquitin-dependent protein catabolic process,GO:0032933~SREBP signaling pathway,GO:0045541~negative regulation of cholesterol biosynthetic process,GO:0045717~negative regulation of fatty acid biosynthetic process | GO:0005737~cytoplasm,GO:0005783~endoplasmic reticulum,GO:0005789~endoplasmic reticulum membrane,GO:0005886~plasma membrane,GO:0016021~integral component of membrane,GO:0043234~protein complex,GO:0045121~membrane raft,GO:0070062~extracellular exosome | GO:0004713~protein tyrosine kinase activity,GO:0005515~protein binding,GO:0015485~cholesterol binding,GO:0031625~ubiquitin protein ligase binding                                                        |              |

| Gene Symbol | MPT X FPT fold change | GOTERM_BP_DIRECT                                                                                                                                                                                                                                                                                                                                                                                                                                                                                                                                                                                                                                                                                                                                                                                                                                                                                                                                                                                                                                                                                                                                                                                                                                                                                                                                                                                                          | GOTERM_CC_DIRECT                                                                                                                                                                                                                                                                                                            | GOTERM_MF_DIRECT                                                                                                                                                                                                                                                                                                                                                    | KEGG_PATHWAY                                                   |
|-------------|-----------------------|---------------------------------------------------------------------------------------------------------------------------------------------------------------------------------------------------------------------------------------------------------------------------------------------------------------------------------------------------------------------------------------------------------------------------------------------------------------------------------------------------------------------------------------------------------------------------------------------------------------------------------------------------------------------------------------------------------------------------------------------------------------------------------------------------------------------------------------------------------------------------------------------------------------------------------------------------------------------------------------------------------------------------------------------------------------------------------------------------------------------------------------------------------------------------------------------------------------------------------------------------------------------------------------------------------------------------------------------------------------------------------------------------------------------------|-----------------------------------------------------------------------------------------------------------------------------------------------------------------------------------------------------------------------------------------------------------------------------------------------------------------------------|---------------------------------------------------------------------------------------------------------------------------------------------------------------------------------------------------------------------------------------------------------------------------------------------------------------------------------------------------------------------|----------------------------------------------------------------|
| PRKDC       | -1.61                 | <p>GO:0001756~somitogenesis,GO:0001933~negative regulation of protein phosphorylation,GO:0002326~B cell lineage commitment,GO:0002328~pro-B cell differentiation,GO:0002360~T cell lineage commitment,GO:0002638~negative regulation of immunoglobulin production,GO:0002684~positive regulation of immune system process,GO:0006302~double-strand break repair,GO:0006303~double-strand break repair via nonhomologous end joining,GO:0006464~cellular protein modification process,GO:0007420~brain development,GO:0007507~heart development,GO:0008283~cell proliferation,GO:0008630~intrinsic apoptotic signaling pathway in response to DNA damage,GO:0010332~response to gamma radiation,GO:0014823~response to activity,GO:0016233~telomere capping,GO:0018105~peptidyl-serine phosphorylation,GO:0031648~protein destabilization,GO:0032481~positive regulation of type I interferon production,GO:0032869~cellular response to insulin stimulus,GO:0033077~T cell differentiation in thymus,GO:0033152~immunoglobulin V(D)J recombination,GO:0033153~T cell receptor V(D)J recombination,GO:0035234~ectopic germ cell programmed cell death,GO:0042752~regulation of circadian rhythm,GO:0043065~positive regulation of apoptotic process,GO:0043066~negative regulation of apoptotic process,GO:0045944~positive regulation of transcription from RNA polymerase II promoter,GO:0048146~positive regulation</p> | <p>GO:0000784~nuclear chromosome, telomeric region,GO:0005654~nucleoplasm,GO:0005667~transcription factor complex,GO:0005730~nucleolus,GO:0005829~cytosol,GO:0005958~DNA-dependent protein kinase-DNA ligase 4 complex,GO:0016020~membrane,GO:0031012~extracellular matrix,GO:0070419~nonhomologous end joining complex</p> | <p>GO:0003690~double-stranded DNA binding,GO:0004672~protein kinase activity,GO:0004674~protein serine/threonine kinase activity,GO:0004677~DNA-dependent protein kinase activity,GO:0005515~protein binding,GO:0005524~ATP binding,GO:0008134~transcription factor binding,GO:0016301~kinase activity,GO:0019899~enzyme binding,GO:0044822~poly(A) RNA binding</p> | <p>hsa03450:Non-homologous end-joining,hsa04110:Cell cycle</p> |



| Gene Symbol | MPT X FPT fold change | GOTERM_BP_DIRECT                                                                                                                                                                                                                                                                                                                                                                                                                                                                                                     | GOTERM_CC_DIRECT | GOTERM_MF_DIRECT | KEGG_PATHWAY |
|-------------|-----------------------|----------------------------------------------------------------------------------------------------------------------------------------------------------------------------------------------------------------------------------------------------------------------------------------------------------------------------------------------------------------------------------------------------------------------------------------------------------------------------------------------------------------------|------------------|------------------|--------------|
|             |                       | of fibroblast proliferation,GO:0048511~rhythmic process,GO:0048536~spleen development,GO:0048538~thymus development,GO:0048639~positive regulation of developmental growth,GO:0048660~regulation of smooth muscle cell proliferation,GO:0072431~signal transduction involved in mitotic G1 DNA damage checkpoint,GO:0097681~double-strand break repair via alternative nonhomologous end joining,GO:2000773~negative regulation of cellular senescence,GO:2001229~negative regulation of response to gamma radiation |                  |                  |              |

| Gene Symbol  | MPT X FPT fold change | GOTERM_BP_DIRECT                                                                                                                                                                                                                                                                                                                                                                                                                                                                                                                                                                                            | GOTERM_CC_DIRECT                                                             | GOTERM_MF_DIRECT                                                                                               | KEGG_PATHWAY                                                                                                                                                                       |
|--------------|-----------------------|-------------------------------------------------------------------------------------------------------------------------------------------------------------------------------------------------------------------------------------------------------------------------------------------------------------------------------------------------------------------------------------------------------------------------------------------------------------------------------------------------------------------------------------------------------------------------------------------------------------|------------------------------------------------------------------------------|----------------------------------------------------------------------------------------------------------------|------------------------------------------------------------------------------------------------------------------------------------------------------------------------------------|
| <i>PHGDH</i> | -1.63                 | GO:0006541~glutamine metabolic process,GO:0006544~glycine metabolic process,GO:0006564~L-serine biosynthetic process,GO:0006566~threonine metabolic process,GO:0007420~brain development,GO:0009070~serine family amino acid biosynthetic process,GO:0009448~gamma-aminobutyric acid metabolic process,GO:0010468~regulation of gene expression,GO:0019530~taurine metabolic process,GO:0021510~spinal cord development,GO:0021782~glial cell development,GO:0021915~neural tube development,GO:0031175~neuron projection development,GO:0055114~oxidation-reduction process,GO:0070314~G1 to G0 transition | GO:0005829~cytosol,GO:0043209~myelin sheath,GO:0070062~extracellular exosome | GO:0004617~phosphoglycerate dehydrogenase activity,GO:0009055~electron carrier activity,GO:0051287~NAD binding | hsa00260:Glycine, serine and threonine metabolism,hsa01100:Metabolic pathways,hsa01130:Biosynthesis of antibiotics,hsa01200:Carbon metabolism,hsa01230:Biosynthesis of amino acids |

| Gene Symbol | MPT X FPT fold change | GOTERM_BP_DIRECT                                                                                                                                                                                                                                                                                                                                                                                                                                                                                                                                                                                                                                                                                                                                                                                                                                                                                                                                                                                                                                                                                                                                                                                                                                                              | GOTERM_CC_DIRECT                                                                                                                                                                                                | GOTERM_MF_DIRECT                                                                                                                                                                                                                                             | KEGG_PATHWAY                                                                |
|-------------|-----------------------|-------------------------------------------------------------------------------------------------------------------------------------------------------------------------------------------------------------------------------------------------------------------------------------------------------------------------------------------------------------------------------------------------------------------------------------------------------------------------------------------------------------------------------------------------------------------------------------------------------------------------------------------------------------------------------------------------------------------------------------------------------------------------------------------------------------------------------------------------------------------------------------------------------------------------------------------------------------------------------------------------------------------------------------------------------------------------------------------------------------------------------------------------------------------------------------------------------------------------------------------------------------------------------|-----------------------------------------------------------------------------------------------------------------------------------------------------------------------------------------------------------------|--------------------------------------------------------------------------------------------------------------------------------------------------------------------------------------------------------------------------------------------------------------|-----------------------------------------------------------------------------|
| DCN         | -1.63                 | <p>GO:0001822~kidney development,GO:0001890~placenta development,GO:0006469~negative regulation of protein kinase activity,GO:0007519~skeletal muscle tissue development,GO:0007568~aging,GO:0009612~response to mechanical stimulus,GO:0009887~organ morphogenesis,GO:0010508~positive regulation of autophagy,GO:0010596~negative regulation of endothelial cell migration,GO:0014068~positive regulation of phosphatidylinositol 3-kinase signaling,GO:0016239~positive regulation of macroautophagy,GO:0016525~negative regulation of angiogenesis,GO:0019221~cytokine-mediated signaling pathway,GO:0019800~peptide cross-linking via chondroitin 4-sulfate glycosaminoglycan,GO:0022617~extracellular matrix disassembly,GO:0030198~extracellular matrix organization,GO:0030203~glycosaminoglycan metabolic process,GO:0030206~chondroitin sulfate biosynthetic process,GO:0030207~chondroitin sulfate catabolic process,GO:0030208~dermatan sulfate biosynthetic process,GO:0032496~response to lipopolysaccharide,GO:0042060~wound healing,GO:0045944~positive regulation of transcription from RNA polymerase II promoter,GO:0046426~negative regulation of JAK-STAT cascade,GO:0051901~positive regulation of mitochondrial depolarization,GO:0090141~positive</p> | <p>GO:0005576~extracellular region,GO:0005589~collagen type VI trimer,GO:0005615~extracellular space,GO:0005737~cytoplasm,GO:0005796~Golgi lumen,GO:0031012~extracellular matrix,GO:0043202~lysosomal lumen</p> | <p>GO:0004860~protein kinase inhibitor activity,GO:0005515~protein binding,GO:0005518~collagen binding,GO:0005539~glycosaminoglycan binding,GO:0044822~poly(A) RNA binding,GO:0047485~protein N-terminus binding,GO:0050840~extracellular matrix binding</p> | <p>hsa04350:TGF-beta signaling pathway,hsa05205:Proteoglycans in cancer</p> |

| Gene Symbol | MPT X FPT fold change | GOTERM_BP_DIRECT                                                                                                                  | GOTERM_CC_DIRECT | GOTERM_MF_DIRECT | KEGG_PATHWAY |
|-------------|-----------------------|-----------------------------------------------------------------------------------------------------------------------------------|------------------|------------------|--------------|
|             |                       | <p>regulation of mitochondrial fission,GO:1900747~negative regulation of vascular endothelial growth factor signaling pathway</p> |                  |                  |              |

| Gene Symbol     | MPT X FPT fold change | GOTERM_BP_DIRECT                                                                                                                                                                                                                                                                                                                                                                                                                                                                                                                                                                                                                                                                                                                                                                                       | GOTERM_CC_DIRECT                                                                                                                                                                                                                                                                                     | GOTERM_MF_DIRECT                                                                                                                                                                                             | KEGG_PATHWAY                                                                                   |
|-----------------|-----------------------|--------------------------------------------------------------------------------------------------------------------------------------------------------------------------------------------------------------------------------------------------------------------------------------------------------------------------------------------------------------------------------------------------------------------------------------------------------------------------------------------------------------------------------------------------------------------------------------------------------------------------------------------------------------------------------------------------------------------------------------------------------------------------------------------------------|------------------------------------------------------------------------------------------------------------------------------------------------------------------------------------------------------------------------------------------------------------------------------------------------------|--------------------------------------------------------------------------------------------------------------------------------------------------------------------------------------------------------------|------------------------------------------------------------------------------------------------|
| <i>HIST1H4A</i> | -1.64                 | <p>GO:0000183~chromatin silencing at rDNA,GO:0006303~double-strand break repair via nonhomologous end joining,GO:0006334~nucleosome assembly,GO:0006335~DNA replication-dependent nucleosome assembly,GO:0006336~DNA replication-independent nucleosome assembly,GO:0006352~DNA-templated transcription, initiation,GO:0016233~telomere capping,GO:0031047~gene silencing by RNA,GO:0032200~telomere organization,GO:0034080~CENP-A containing nucleosome assembly,GO:0044267~cellular protein metabolic process,GO:0045653~negative regulation of megakaryocyte differentiation,GO:0045814~negative regulation of gene expression, epigenetic,GO:0045815~positive regulation of gene expression, epigenetic,GO:0051290~protein heterotetramerization,GO:1904837~beta-catenin-TCF complex assembly</p> | <p>GO:0000228~nuclear chromosome,GO:0000784~nuclear chromosome, telomeric region,GO:0000786~nucleosome,GO:0005576~extracellular region,GO:0005634~nucleus,GO:0005654~nucleoplasm,GO:0016020~membrane,GO:0031012~extracellular matrix,GO:0043234~protein complex,GO:0070062~extracellular exosome</p> | <p>GO:0003677~DNA binding,GO:0005515~protein binding,GO:0019904~protein domain specific binding,GO:0042393~histone binding,GO:0044822~poly(A) RNA binding,GO:0046982~protein heterodimerization activity</p> | <p>hsa05034:Alcoholism,hsa05203:Viral carcinogenesis,hsa05322:Systemic lupus erythematosus</p> |

| Gene Symbol | MPT X FPT fold change | GOTERM_BP_DIRECT                                                                                                                                                                                                                                                                                                                                                                                                                                                                                                                                                                                                                                                                                                                                                                                                                                                                                                                                                                                                      | GOTERM_CC_DIRECT                                                                                                                                                                                                                                                                                                      | GOTERM_MF_DIRECT                                                                                                                                                                                                                                                                                                                                                                                      | KEGG_PATHWAY                                                                                                                        |
|-------------|-----------------------|-----------------------------------------------------------------------------------------------------------------------------------------------------------------------------------------------------------------------------------------------------------------------------------------------------------------------------------------------------------------------------------------------------------------------------------------------------------------------------------------------------------------------------------------------------------------------------------------------------------------------------------------------------------------------------------------------------------------------------------------------------------------------------------------------------------------------------------------------------------------------------------------------------------------------------------------------------------------------------------------------------------------------|-----------------------------------------------------------------------------------------------------------------------------------------------------------------------------------------------------------------------------------------------------------------------------------------------------------------------|-------------------------------------------------------------------------------------------------------------------------------------------------------------------------------------------------------------------------------------------------------------------------------------------------------------------------------------------------------------------------------------------------------|-------------------------------------------------------------------------------------------------------------------------------------|
| <i>PFN1</i> | -1.65                 | <p>GO:0001843~neural tube closure,GO:0010634~positive regulation of epithelial cell migration,GO:0030036~actin cytoskeleton organization,GO:0030837~negative regulation of actin filament polymerization,GO:0030838~positive regulation of actin filament polymerization,GO:0032232~negative regulation of actin filament bundle assembly,GO:0032233~positive regulation of actin filament bundle assembly,GO:0032781~positive regulation of ATPase activity,GO:0045944~positive regulation of transcription from RNA polymerase II promoter,GO:0050434~positive regulation of viral transcription,GO:0050821~protein stabilization,GO:0051054~positive regulation of DNA metabolic process,GO:0051496~positive regulation of stress fiber assembly,GO:0051497~negative regulation of stress fiber assembly,GO:0060071~Wnt signaling pathway, planar cell polarity pathway,GO:0071363~cellular response to growth factor stimulus,GO:0098609~cell-cell adhesion,GO:1900029~positive regulation of ruffle assembly</p> | <p>GO:0005634~nucleus,GO:0005737~cytoplasm,GO:0005829~cytosol,GO:0005856~cytoskeleton,GO:0005913~cell-cell adherens junction,GO:0005925~focal adhesion,GO:0005938~cell cortex,GO:0016020~membrane,GO:0043005~neuron projection,GO:0045202~synapse,GO:0070062~extracellular exosome,GO:0072562~blood microparticle</p> | <p>GO:0000774~adenyl-nucleotide exchange factor activity,GO:0003779~actin binding,GO:0003785~actin monomer binding,GO:0005102~receptor binding,GO:0005515~protein binding,GO:0005546~phosphatidylinositol-4,5-bisphosphate binding,GO:0017048~Rho GTPase binding,GO:0044822~poly(A) RNA binding,GO:0070064~proline-rich region binding,GO:0098641~cadherin binding involved in cell-cell adhesion</p> | <p>hsa04015:Rap1 signaling pathway,hsa04810:Regulation of actin cytoskeleton,hsa05131:Shigellosis,hsa05132:Salmonella infection</p> |

| Gene Symbol | MPT X FPT fold change | GOTERM_BP_DIRECT                                                                                                                                                                                                                                                                                                                                                       | GOTERM_CC_DIRECT                                                                                                                                                                                                                                                                                                                                                                                                                                                                                                                                                                                                                                                                                                                                                                | GOTERM_MF_DIRECT                                                                                                                                                                            | KEGG_PATHWAY                                                 |
|-------------|-----------------------|------------------------------------------------------------------------------------------------------------------------------------------------------------------------------------------------------------------------------------------------------------------------------------------------------------------------------------------------------------------------|---------------------------------------------------------------------------------------------------------------------------------------------------------------------------------------------------------------------------------------------------------------------------------------------------------------------------------------------------------------------------------------------------------------------------------------------------------------------------------------------------------------------------------------------------------------------------------------------------------------------------------------------------------------------------------------------------------------------------------------------------------------------------------|---------------------------------------------------------------------------------------------------------------------------------------------------------------------------------------------|--------------------------------------------------------------|
| <i>GLO1</i> | -1.65                 | GO:0005975~carbohydrate metabolic process,GO:0006090~pyruvate metabolic process,GO:0006357~regulation of transcription from RNA polymerase II promoter,GO:0006749~glutathione metabolic process,GO:0009438~methylglyoxal metabolic process,GO:0030316~osteoclast differentiation,GO:0043066~negative regulation of apoptotic process                                   | GO:0005737~cytoplasm,GO:0005829~cytosol,GO:0070062~extracellular exosome                                                                                                                                                                                                                                                                                                                                                                                                                                                                                                                                                                                                                                                                                                        | GO:0004462~lactoylglutathione lyase activity,GO:0008270~zinc ion binding                                                                                                                    | hsa00620:Pyruvate metabolism                                 |
| <i>TF</i>   | -1.66                 | GO:0001895~retina homeostasis,GO:0002576~platelet degranulation,GO:0006879~cellular iron ion homeostasis,GO:0031647~regulation of protein stability,GO:0033572~transferrin transport,GO:0048260~positive regulation of receptor-mediated endocytosis,GO:0055072~iron ion homeostasis,GO:0071281~cellular response to iron ion,GO:0097460~ferrous iron import into cell | GO:0005576~extracellular region,GO:0005615~extracellular space,GO:0005769~early endosome,GO:0005770~late endosome,GO:0005905~clathrin-coated pit,GO:0009925~basal plasma membrane,GO:0009986~cell surface,GO:0010008~endosome membrane,GO:0016023~cytoplasmic, membrane-bounded vesicle,GO:0016324~apical plasma membrane,GO:0030120~vesicle coat,GO:0030139~endocytic vesicle,GO:0031232~extrinsic component of external side of plasma membrane,GO:0031410~cytoplasmic vesicle,GO:0031982~vesicle,GO:0034774~secretory granule lumen,GO:0045178~basal part of cell,GO:0048471~perinuclear region of cytoplasm,GO:0055037~recycling endosome,GO:0070062~extracellular exosome,GO:0072562~blood microparticle,GO:0097433~dense body,GO:1990712~HFE-transferrin receptor complex | GO:0005515~protein binding,GO:0008198~ferrous iron binding,GO:0008199~ferric iron binding,GO:0015091~ferric iron transmembrane transporter activity,GO:1990459~transferrin receptor binding | hsa04066:HIF-1 signaling pathway,hsa04978:Mineral absorption |

| Gene Symbol  | MPT X FPT fold change | GOTERM_BP_DIRECT                                                                                                                                                       | GOTERM_CC_DIRECT                                                                                                                                                                                                                                                                                                                                                                                                                                   | GOTERM_MF_DIRECT                                                                                                                                                                                                   | KEGG_PATHWAY |
|--------------|-----------------------|------------------------------------------------------------------------------------------------------------------------------------------------------------------------|----------------------------------------------------------------------------------------------------------------------------------------------------------------------------------------------------------------------------------------------------------------------------------------------------------------------------------------------------------------------------------------------------------------------------------------------------|--------------------------------------------------------------------------------------------------------------------------------------------------------------------------------------------------------------------|--------------|
| <i>AHNAK</i> | -1.69                 | GO:0043484~regulation of RNA splicing,GO:0051259~protein oligomerization,GO:0098609~cell-cell adhesion,GO:1901385~regulation of voltage-gated calcium channel activity | GO:0005634~nucleus,GO:0005737~cytoplasm,GO:0005765~lysosomal membrane,GO:0005829~cytosol,GO:0005886~plasma membrane,GO:0005913~cell-cell adherens junction,GO:0005925~focal adhesion,GO:0015629~actin cytoskeleton,GO:0016020~membrane,GO:0019013~viral nucleocapsid,GO:0030315~T-tubule,GO:0031982~vesicle,GO:0042383~sarcolemma,GO:0043034~costamere,GO:0044291~cell-cell contact zone,GO:0045121~membrane raft,GO:0070062~extracellular exosome | GO:0005515~protein binding,GO:0044548~S100 protein binding,GO:0044822~poly(A) RNA binding,GO:0097493~structural molecule activity conferring elasticity,GO:0098641~cadherin binding involved in cell-cell adhesion |              |



| Gene Symbol | MPT X FPT fold change | GOTERM_BP_DIRECT                                                                                                                                                                                                                                                                                                                                                                                                                                                                                                              | GOTERM_CC_DIRECT                                                                                                                                                                                                                                                                                 | GOTERM_MF_DIRECT                                                                                                                                                                 | KEGG_PATHWAY |
|-------------|-----------------------|-------------------------------------------------------------------------------------------------------------------------------------------------------------------------------------------------------------------------------------------------------------------------------------------------------------------------------------------------------------------------------------------------------------------------------------------------------------------------------------------------------------------------------|--------------------------------------------------------------------------------------------------------------------------------------------------------------------------------------------------------------------------------------------------------------------------------------------------|----------------------------------------------------------------------------------------------------------------------------------------------------------------------------------|--------------|
| <i>BGN</i>  | -1.72                 | GO:0001974~blood vessel remodeling,GO:0006469~negative regulation of protein kinase activity,GO:0019221~cytokine-mediated signaling pathway,GO:0019800~peptide cross-linking via chondroitin 4-sulfate glycosaminoglycan,GO:0030198~extracellular matrix organization,GO:0030203~glycosaminoglycan metabolic process,GO:0030206~chondroitin sulfate biosynthetic process,GO:0030207~chondroitin sulfate catabolic process,GO:0030208~dermatan sulfate biosynthetic process,GO:0046426~negative regulation of JAK-STAT cascade | GO:0005576~extracellular region,GO:0005578~proteinaceous extracellular matrix,GO:0005737~cytoplasm,GO:0005796~Golgi lumen,GO:0009986~cell surface,GO:0030133~transport vesicle,GO:0031012~extracellular matrix,GO:0042383~sarcolemma,GO:0043202~lysosomal lumen,GO:0070062~extracellular exosome | GO:0004860~protein kinase inhibitor activity,GO:0005201~extracellular matrix structural constituent,GO:0005539~glycosaminoglycan binding,GO:0050840~extracellular matrix binding |              |

| Gene Symbol | MPT X FPT fold change | GOTERM_BP_DIRECT                                                                                                                                                                                                                                                                                                                                                                                                                                                                                                                                                                                                                                                                                                                                                                                                                                                                                                                                                                                                  | GOTERM_CC_DIRECT                                                                                                                                                                                                | GOTERM_MF_DIRECT                   | KEGG_PATHWAY                                                                                                                      |
|-------------|-----------------------|-------------------------------------------------------------------------------------------------------------------------------------------------------------------------------------------------------------------------------------------------------------------------------------------------------------------------------------------------------------------------------------------------------------------------------------------------------------------------------------------------------------------------------------------------------------------------------------------------------------------------------------------------------------------------------------------------------------------------------------------------------------------------------------------------------------------------------------------------------------------------------------------------------------------------------------------------------------------------------------------------------------------|-----------------------------------------------------------------------------------------------------------------------------------------------------------------------------------------------------------------|------------------------------------|-----------------------------------------------------------------------------------------------------------------------------------|
| <i>TNC</i>  | -1.72                 | <p>GO:0001649~osteoblast differentiation,GO:0007155~cell adhesion,GO:0007162~negative regulation of cell adhesion,GO:0007528~neuromuscular junction development,GO:0008284~positive regulation of cell proliferation,GO:0009611~response to wounding,GO:0009612~response to mechanical stimulus,GO:0010628~positive regulation of gene expression,GO:0014012~peripheral nervous system axon regeneration,GO:0030198~extracellular matrix organization,GO:0042060~wound healing,GO:0042127~regulation of cell proliferation,GO:0042475~odontogenesis of dentin-containing tooth,GO:0045471~response to ethanol,GO:0060447~bud outgrowth involved in lung branching,GO:0060739~mesenchymal-epithelial cell signaling involved in prostate gland development,GO:0060740~prostate gland epithelium morphogenesis,GO:0071300~cellular response to retinoic acid,GO:0071305~cellular response to vitamin D,GO:0071774~response to fibroblast growth factor,GO:0071799~cellular response to prostaglandin D stimulus</p> | <p>GO:0005576~extracellular region,GO:0005604~basement membrane,GO:0005614~interstitial matrix,GO:0005615~extracellular space,GO:0005925~focal adhesion,GO:0016020~membrane,GO:0031012~extracellular matrix</p> | <p>GO:0045545~syndecan binding</p> | <p>hsa04151:PI3K-Akt signaling pathway,hsa04510:Focal adhesion,hsa04512:ECM-receptor interaction,hsa05206:MicroRNAs in cancer</p> |

| Gene Symbol     | MPT X FPT fold change | GOTERM_BP_DIRECT                                                                                                                                                                                                                                                                                                                                                                                                                                                                        | GOTERM_CC_DIRECT                                                                                                                                                                                                                                                                                                                                                                               | GOTERM_MF_DIRECT                                                                                                                                         | KEGG_PATHWAY                                 |
|-----------------|-----------------------|-----------------------------------------------------------------------------------------------------------------------------------------------------------------------------------------------------------------------------------------------------------------------------------------------------------------------------------------------------------------------------------------------------------------------------------------------------------------------------------------|------------------------------------------------------------------------------------------------------------------------------------------------------------------------------------------------------------------------------------------------------------------------------------------------------------------------------------------------------------------------------------------------|----------------------------------------------------------------------------------------------------------------------------------------------------------|----------------------------------------------|
| <i>SERPIND1</i> | -1.79                 | GO:0006935~chemotaxis,GO:0007596~blood coagulation,GO:0008218~bioluminescence,GO:0010951~negative regulation of endopeptidase activity                                                                                                                                                                                                                                                                                                                                                  | GO:0005576~extracellular region,GO:0005615~extracellular space,GO:0070062~extracellular exosome                                                                                                                                                                                                                                                                                                | GO:0004866~endopeptidase inhibitor activity,GO:0004867~serine-type endopeptidase inhibitor activity,GO:0008201~heparin binding                           | hsa04610:Complement and coagulation cascades |
| <i>LCPI</i>     | -1.81                 | GO:0002286~T cell activation involved in immune response,GO:0010737~protein kinase A signaling,GO:0016477~cell migration,GO:0022617~extracellular matrix disassembly,GO:0031100~organ regeneration,GO:0033157~regulation of intracellular protein transport,GO:0044319~wound healing, spreading of cells,GO:0051017~actin filament bundle assembly,GO:0051639~actin filament network formation,GO:0051764~actin crosslink formation,GO:0071803~positive regulation of podosome assembly | GO:0001725~stress fiber,GO:0001726~ruffle,GO:0001891~phagocytic cup,GO:0002102~podosome,GO:0005615~extracellular space,GO:0005737~cytoplasm,GO:0005829~cytosol,GO:0005884~actin filament,GO:0005886~plasma membrane,GO:0005925~focal adhesion,GO:0015629~actin cytoskeleton,GO:0030175~filopodium,GO:0032432~actin filament bundle,GO:0032587~ruffle membrane,GO:0070062~extracellular exosome | GO:0003779~actin binding,GO:0005509~calcium ion binding,GO:0042802~identical protein binding,GO:0051015~actin filament binding,GO:0051020~GTPase binding |                                              |
| <i>ITIH1</i>    | -1.82                 | GO:0010951~negative regulation of endopeptidase activity,GO:0030212~hyaluronan metabolic process                                                                                                                                                                                                                                                                                                                                                                                        | GO:0005576~extracellular region,GO:0070062~extracellular exosome,GO:0072562~blood microparticle                                                                                                                                                                                                                                                                                                | GO:0004867~serine-type endopeptidase inhibitor activity,GO:0005509~calcium ion binding                                                                   |                                              |

| Gene Symbol  | MPT X FPT fold change | GOTERM_BP_DIRECT                                                                                                                                                                                                                                                                                                                                                                                                                         | GOTERM_CC_DIRECT                                                                                                                                                                                                          | GOTERM_MF_DIRECT                                                                                                                                                                         | KEGG_PATHWAY                            |
|--------------|-----------------------|------------------------------------------------------------------------------------------------------------------------------------------------------------------------------------------------------------------------------------------------------------------------------------------------------------------------------------------------------------------------------------------------------------------------------------------|---------------------------------------------------------------------------------------------------------------------------------------------------------------------------------------------------------------------------|------------------------------------------------------------------------------------------------------------------------------------------------------------------------------------------|-----------------------------------------|
| <i>IGHG4</i> | -1.93                 | GO:0006508~proteolysis,GO:0006910~phagocytosis, recognition,GO:0006911~phagocytosis, engulfment,GO:0006956~complement activation,GO:0006958~complement activation, classical pathway,GO:0038096~Fc-gamma receptor signaling pathway involved in phagocytosis,GO:0042742~defense response to bacterium,GO:0045087~innate immune response,GO:0050853~B cell receptor signaling pathway,GO:0050871~positive regulation of B cell activation | GO:0005576~extracellular region,GO:0005615~extracellular space,GO:0009897~external side of plasma membrane,GO:0042571~immunoglobulin complex, circulating,GO:0070062~extracellular exosome,GO:0072562~blood microparticle | GO:0003823~antigen binding,GO:0004252~serine-type endopeptidase activity,GO:0034987~immunoglobulin receptor binding                                                                      |                                         |
| <i>GPD1</i>  | -1.95                 | GO:0006094~gluconeogenesis,GO:0006127~glycerophosphate shuttle,GO:0006654~phosphatidic acid biosynthetic process,GO:0019432~triglyceride biosynthetic process,GO:0045821~positive regulation of glycolytic process,GO:0046168~glycerol-3-phosphate catabolic process,GO:0046486~glycerolipid metabolic process,GO:0071320~cellular response to cAMP,GO:0071356~cellular response to tumor necrosis factor                                | GO:0005739~mitochondrion,GO:0005829~cytosol,GO:0009331~glycerol-3-phosphate dehydrogenase complex,GO:0070062~extracellular exosome                                                                                        | GO:0004367~glycerol-3-phosphate dehydrogenase [NAD+] activity,GO:0004368~glycerol-3-phosphate dehydrogenase activity,GO:0042803~protein homodimerization activity,GO:0051287~NAD binding | hsa00564:Glycerophospholipid metabolism |

| Gene Symbol  | MPT X FPT fold change | GOTERM_BP_DIRECT                                                                                                                                                                                                                                                                                                                                                                                                                                                                                                          | GOTERM_CC_DIRECT                                                                                                                                                                                                                                                     | GOTERM_MF_DIRECT                                                                                                                                | KEGG_PATHWAY                                                                   |
|--------------|-----------------------|---------------------------------------------------------------------------------------------------------------------------------------------------------------------------------------------------------------------------------------------------------------------------------------------------------------------------------------------------------------------------------------------------------------------------------------------------------------------------------------------------------------------------|----------------------------------------------------------------------------------------------------------------------------------------------------------------------------------------------------------------------------------------------------------------------|-------------------------------------------------------------------------------------------------------------------------------------------------|--------------------------------------------------------------------------------|
| <i>LUM</i>   | -1.96                 | GO:0007409~axonogenesis,GO:0007601~visual perception,GO:0014070~response to organic cyclic compound,GO:0018146~keratan sulfate biosynthetic process,GO:0030198~extracellular matrix organization,GO:0030199~collagen fibril organization,GO:0032914~positive regulation of transforming growth factor beta1 production,GO:0042340~keratan sulfate catabolic process,GO:0045944~positive regulation of transcription from RNA polymerase II promoter,GO:0051216~cartilage development,GO:0070848~response to growth factor | GO:0005576~extracellular region,GO:0005578~proteinaceous extracellular matrix,GO:0005583~fibrillar collagen trimer,GO:0005615~extracellular space,GO:0005796~Golgi lumen,GO:0031012~extracellular matrix,GO:0043202~lysosomal lumen,GO:0070062~extracellular exosome | GO:0005201~extracellular matrix structural constituent,GO:0005515~protein binding,GO:0005518~collagen binding                                   | hsa05205:Proteoglycans in cancer                                               |
| <i>HBD</i>   | -2.00                 | GO:0007596~blood coagulation,GO:0015671~oxygen transport                                                                                                                                                                                                                                                                                                                                                                                                                                                                  | GO:0005829~cytosol,GO:0005833~hemo globin complex,GO:0072562~blood microparticle                                                                                                                                                                                     | GO:0005344~oxygen transporter activity,GO:0005506~iron ion binding,GO:0005515~protein binding,GO:0019825~oxygen binding,GO:0020037~heme binding |                                                                                |
| <i>PLIN1</i> | -2.08                 | GO:0006629~lipid metabolic process,GO:0016042~lipid catabolic process                                                                                                                                                                                                                                                                                                                                                                                                                                                     | GO:0005783~endoplasmic reticulum,GO:0005811~lipid particle,GO:0005829~cytosol,GO:0016021~integral component of membrane                                                                                                                                              | GO:0008289~lipid binding                                                                                                                        | hsa03320:PPAR signaling pathway,hsa04923:Regulation of lipolysis in adipocytes |

| Gene Symbol  | MPT X FPT fold change | GOTERM_BP_DIRECT                                                                                                                                                                                                                                                                                                                                                                                                                                                                                                                                                                                                                                                                                                                                                                                                                                                                                                                                                                                                                                        | GOTERM_CC_DIRECT                                                                                                                                                                                                                                                                                                                                                                                                                                                                                   | GOTERM_MF_DIRECT                                                                                                                                                                                                                                                  | KEGG_PATHWAY                                                |
|--------------|-----------------------|---------------------------------------------------------------------------------------------------------------------------------------------------------------------------------------------------------------------------------------------------------------------------------------------------------------------------------------------------------------------------------------------------------------------------------------------------------------------------------------------------------------------------------------------------------------------------------------------------------------------------------------------------------------------------------------------------------------------------------------------------------------------------------------------------------------------------------------------------------------------------------------------------------------------------------------------------------------------------------------------------------------------------------------------------------|----------------------------------------------------------------------------------------------------------------------------------------------------------------------------------------------------------------------------------------------------------------------------------------------------------------------------------------------------------------------------------------------------------------------------------------------------------------------------------------------------|-------------------------------------------------------------------------------------------------------------------------------------------------------------------------------------------------------------------------------------------------------------------|-------------------------------------------------------------|
| <i>CRYAB</i> | -2.10                 | <p>GO:0001666~response to hypoxia,GO:0002088~lens development in camera-type eye,GO:0006457~protein folding,GO:0006936~muscle contraction,GO:0007021~tubulin complex assembly,GO:0007517~muscle organ development,GO:0007568~aging,GO:0010629~negative regulation of gene expression,GO:0010941~regulation of cell death,GO:0030308~negative regulation of cell growth,GO:0031109~microtubule polymerization or depolymerization,GO:0032355~response to estradiol,GO:0032387~negative regulation of intracellular transport,GO:0042542~response to hydrogen peroxide,GO:0043066~negative regulation of apoptotic process,GO:0043154~negative regulation of cysteine-type endopeptidase activity involved in apoptotic process,GO:0051260~protein homooligomerization,GO:0051403~stress-activated MAPK cascade,GO:0060561~apoptotic process involved in morphogenesis,GO:0071480~cellular response to gamma radiation,GO:1900034~regulation of cellular response to heat,GO:2000378~negative regulation of reactive oxygen species metabolic process</p> | <p>GO:0005634~nucleus,GO:0005654~nucleoplasm,GO:0005737~cytoplasm,GO:0005739~mitochondrion,GO:0005794~Golgi apparatus,GO:0005829~cytosol,GO:0009986~cell surface,GO:0014069~postsynaptic density,GO:0015630~microtubule cytoskeleton,GO:0030018~Z disc,GO:0030424~axon,GO:0031430~M band,GO:0032432~actin filament bundle,GO:0043197~dendritic spine,GO:0043204~perikaryon,GO:0043209~myelin sheath,GO:0070062~extracellular exosome,GO:0097060~synaptic membrane,GO:0097512~cardiac myofibril</p> | <p>GO:0005212~structural constituent of eye lens,GO:0005515~protein binding,GO:0008017~microtubule binding,GO:0042802~identical protein binding,GO:0042803~protein homodimerization activity,GO:0046872~metal ion binding,GO:0051082~unfolded protein binding</p> | <p>hsa04141:Protein processing in endoplasmic reticulum</p> |

| Gene Symbol  | MPT X FPT fold change | GOTERM_BP_DIRECT                                                                                                                                                                                                                                                                                                                           | GOTERM_CC_DIRECT                                                                                                                                                                                            | GOTERM_MF_DIRECT                                                                                                                         | KEGG_PATHWAY                                                                                                               |
|--------------|-----------------------|--------------------------------------------------------------------------------------------------------------------------------------------------------------------------------------------------------------------------------------------------------------------------------------------------------------------------------------------|-------------------------------------------------------------------------------------------------------------------------------------------------------------------------------------------------------------|------------------------------------------------------------------------------------------------------------------------------------------|----------------------------------------------------------------------------------------------------------------------------|
| <i>TNXB</i>  | -2.15                 | GO:0007155~cell adhesion,GO:0030036~actin cytoskeleton organization,GO:0030199~collagen fibril organization,GO:0032963~collagen metabolic process,GO:0048251~elastic fiber assembly                                                                                                                                                        | GO:0005578~proteinaceous extracellular matrix,GO:0005583~fibrillar collagen trimer,GO:0005615~extracellular space,GO:0005622~intracellular,GO:0031012~extracellular matrix,GO:0070062~extracellular exosome | GO:0005178~integrin binding,GO:0005201~extracellular matrix structural constituent,GO:0005515~protein binding,GO:0008201~heparin binding | hsa04151:PI3K-Akt signaling pathway,hsa04510:Focal adhesion,hsa04512:ECM-receptor interaction,hsa05206:MicroRNAs in cancer |
| <i>DHRS2</i> | -2.25                 | GO:0008207~C21-steroid hormone metabolic process,GO:0008285~negative regulation of cell proliferation,GO:0009636~response to toxic substance,GO:0034599~cellular response to oxidative stress,GO:0043011~myeloid dendritic cell differentiation,GO:0043066~negative regulation of apoptotic process,GO:0055114~oxidation-reduction process | GO:0005634~nucleus,GO:0005635~nuclear envelope,GO:0005737~cytoplasm,GO:0005739~mitochondrion,GO:0005759~mitochondrial matrix,GO:0070062~extracellular exosome                                               | GO:0004090~carbonyl reductase (NADPH) activity,GO:0005515~protein binding,GO:0016491~oxidoreductase activity                             |                                                                                                                            |

| Gene Symbol  | MPT X FPT fold change | GOTERM_BP_DIRECT                                                                                                                                                                                                                                                                                                                                                                                                                                                                                                                                                                                                                                                                                                                                                                                                                                                        | GOTERM_CC_DIRECT                                                                                                                                                                                 | GOTERM_MF_DIRECT                                                                                                                                                                                                                                                                      | KEGG_PATHWAY                                                            |
|--------------|-----------------------|-------------------------------------------------------------------------------------------------------------------------------------------------------------------------------------------------------------------------------------------------------------------------------------------------------------------------------------------------------------------------------------------------------------------------------------------------------------------------------------------------------------------------------------------------------------------------------------------------------------------------------------------------------------------------------------------------------------------------------------------------------------------------------------------------------------------------------------------------------------------------|--------------------------------------------------------------------------------------------------------------------------------------------------------------------------------------------------|---------------------------------------------------------------------------------------------------------------------------------------------------------------------------------------------------------------------------------------------------------------------------------------|-------------------------------------------------------------------------|
| <i>PTGIS</i> | -2.46                 | <p>GO:0001516~prostaglandin biosynthetic process,GO:0006690~icosanoid metabolic process,GO:0006769~nicotinamide metabolic process,GO:0007566~embryo implantation,GO:0019371~cyclooxygenase pathway,GO:0032088~negative regulation of NF-kappaB transcription factor activity,GO:0035360~positive regulation of peroxisome proliferator activated receptor signaling pathway,GO:0045019~negative regulation of nitric oxide biosynthetic process,GO:0045766~positive regulation of angiogenesis,GO:0046697~decidualization ,GO:0050728~negative regulation of inflammatory response,GO:0055114~oxidation-reduction process,GO:0071347~cellular response to interleukin-1,GO:0071354~cellular response to interleukin-6,GO:0071456~cellular response to hypoxia,GO:0097190~apoptotic signaling pathway,GO:1900119~positive regulation of execution phase of apoptosis</p> | <p>GO:0005615~extracellular space,GO:0005634~nucleus,GO:0005783~endoplasmic reticulum,GO:0005789~endoplasmic reticulum membrane,GO:0005901~caveola,GO:0016021~integral component of membrane</p> | <p>GO:0004497~monooxygenase activity,GO:0005506~iron ion binding,GO:0005515~protein binding,GO:0008116~prostaglandin-I synthase activity,GO:0016705~oxidoreductase activity, acting on paired donors, with incorporation or reduction of molecular oxygen,GO:0020037~heme binding</p> | <p>hsa00590:Arachidonic acid metabolism,hsa01100:Metabolic pathways</p> |



| Gene Symbol | MPT X FPT fold change | GOTERM_BP_DIRECT                                                                                                                                                                                                                                                                                                                                                                                                                                                                                                                                                                                                                                                                                                                                                                                                                                                                                                                                                                                                                                                                                                                                                                                                                                                                                                                                                 | GOTERM_CC_DIRECT                                                                                                                                                                                                                                                                                                                                                                                                                                                                                                                                    | GOTERM_MF_DIRECT                                                                                                                                                                                                                                                                                                                                                                                               | KEGG_PATHWAY                                                                                                                                                                                                                                                                                 |
|-------------|-----------------------|------------------------------------------------------------------------------------------------------------------------------------------------------------------------------------------------------------------------------------------------------------------------------------------------------------------------------------------------------------------------------------------------------------------------------------------------------------------------------------------------------------------------------------------------------------------------------------------------------------------------------------------------------------------------------------------------------------------------------------------------------------------------------------------------------------------------------------------------------------------------------------------------------------------------------------------------------------------------------------------------------------------------------------------------------------------------------------------------------------------------------------------------------------------------------------------------------------------------------------------------------------------------------------------------------------------------------------------------------------------|-----------------------------------------------------------------------------------------------------------------------------------------------------------------------------------------------------------------------------------------------------------------------------------------------------------------------------------------------------------------------------------------------------------------------------------------------------------------------------------------------------------------------------------------------------|----------------------------------------------------------------------------------------------------------------------------------------------------------------------------------------------------------------------------------------------------------------------------------------------------------------------------------------------------------------------------------------------------------------|----------------------------------------------------------------------------------------------------------------------------------------------------------------------------------------------------------------------------------------------------------------------------------------------|
| CD36        | -2.67                 | <p>GO:0000122~negative regulation of transcription from RNA polymerase II promoter,GO:0001954~positive regulation of cell-matrix adhesion,GO:0002479~antigen processing and presentation of exogenous peptide antigen via MHC class I, TAP-dependent,GO:0002576~platelet degranulation,GO:0002755~MyD88-dependent toll-like receptor signaling pathway,GO:0006629~lipid metabolic process,GO:0006898~receptor-mediated endocytosis,GO:0006910~phagocytosis, recognition,GO:0006955~immune response,GO:0007155~cell adhesion,GO:0007166~cell surface receptor signaling pathway,GO:0007204~positive regulation of cytosolic calcium ion concentration,GO:0007263~nitric oxide mediated signal transduction,GO:0007596~blood coagulation,GO:0010744~positive regulation of macrophage derived foam cell differentiation,GO:0010886~positive regulation of cholesterol storage,GO:0019915~lipid storage,GO:0019934~cGMP-mediated signaling,GO:0030194~positive regulation of blood coagulation,GO:0030299~intestinal cholesterol absorption,GO:0030301~cholesterol transport,GO:0031623~receptor internalization,GO:0032735~positive regulation of interleukin-12 production,GO:0032755~positive regulation of interleukin-6 production,GO:0032760~positive regulation of tumor necrosis factor production,GO:0033993~response to lipid,GO:0034197~triglyceride</p> | <p>GO:0005581~collagen trimer,GO:0005615~extracellular space,GO:0005794~Golgi apparatus,GO:0005886~plasma membrane,GO:0005887~integral component of plasma membrane,GO:0009897~external side of plasma membrane,GO:0009986~cell surface,GO:0016020~membrane,GO:0016021~integral component of membrane,GO:0016324~apical plasma membrane,GO:0030666~endocytic vesicle membrane,GO:0031092~platelet alpha granule membrane,GO:0031526~brush border membrane,GO:0045121~membrane raft,GO:0045177~apical part of cell,GO:0045335~phagocytic vesicle</p> | <p>GO:0005041~low-density lipoprotein receptor activity,GO:0005515~protein binding,GO:0008035~high-density lipoprotein particle binding,GO:0008289~lipid binding,GO:0030169~low-density lipoprotein particle binding,GO:0050431~transforming growth factor beta binding,GO:0070053~thrombospondin receptor activity,GO:0070892~lipoteichoic acid receptor activity,GO:0071813~lipoprotein particle binding</p> | <p>hsa03320:PPAR signaling pathway,hsa04145:Phagosome,hsa04152: AMPK signaling pathway,hsa04512:ECM-receptor interaction,hsa04640:Hematopoietic cell lineage,hsa04920:Adipocytokine signaling pathway,hsa04931:Insulin resistance,hsa04975:Fat digestion and absorption,hsa05144:Malaria</p> |

| Gene Symbol | MPT X FPT fold change | GOTERM_BP_DIRECT                                                                                                                                                                                                                                                                                                                                                                                                                                                                                                                                                                                                                                                                                                                                                                                                                                                                                                                                                                                                                                                                                                                                                                                                                                                                                                                                                                                                                                         | GOTERM_CC_DIRECT | GOTERM_MF_DIRECT | KEGG_PATHWAY |
|-------------|-----------------------|----------------------------------------------------------------------------------------------------------------------------------------------------------------------------------------------------------------------------------------------------------------------------------------------------------------------------------------------------------------------------------------------------------------------------------------------------------------------------------------------------------------------------------------------------------------------------------------------------------------------------------------------------------------------------------------------------------------------------------------------------------------------------------------------------------------------------------------------------------------------------------------------------------------------------------------------------------------------------------------------------------------------------------------------------------------------------------------------------------------------------------------------------------------------------------------------------------------------------------------------------------------------------------------------------------------------------------------------------------------------------------------------------------------------------------------------------------|------------------|------------------|--------------|
|             |                       | <p>transport,GO:0034381~plasma lipoprotein particle clearance,GO:0034383~low-density lipoprotein particle clearance,GO:0035634~response to stilbenoid,GO:0038124~toll-like receptor TLR6:TLR2 signaling pathway,GO:0042953~lipoprotein transport,GO:0042992~negative regulation of transcription factor import into nucleus,GO:0043123~positive regulation of I-kappaB kinase/NF-kappaB signaling,GO:0043277~apoptotic cell clearance,GO:0044130~negative regulation of growth of symbiont in host,GO:0044539~long-chain fatty acid import,GO:0050702~interleukin-1 beta secretion,GO:0050731~positive regulation of peptidyl-tyrosine phosphorylation,GO:0050830~defense response to Gram-positive bacterium,GO:0050892~intestinal absorption,GO:0050909~sensory perception of taste,GO:0055096~low-density lipoprotein particle mediated signaling,GO:0060100~positive regulation of phagocytosis, engulfment,GO:0060907~positive regulation of macrophage cytokine production,GO:0070374~positive regulation of ERK1 and ERK2 cascade,GO:0070508~cholesterol import,GO:0070542~response to fatty acid,GO:0070543~response to linoleic acid,GO:0071221~cellular response to bacterial lipopeptide,GO:0071222~cellular response to lipopolysaccharide,GO:0071223~cellular response to lipoteichoic acid,GO:0071404~cellular response to low-density lipoprotein particle stimulus,GO:0071447~cellular response to hydroperoxide,GO:0071726~cellular</p> |                  |                  |              |

| Gene Symbol | MPT X FPT fold change | GOTERM_BP_DIRECT                                                                                                                                                                                                                                                                                                                                                                                          | GOTERM_CC_DIRECT | GOTERM_MF_DIRECT | KEGG_PATHWAY |
|-------------|-----------------------|-----------------------------------------------------------------------------------------------------------------------------------------------------------------------------------------------------------------------------------------------------------------------------------------------------------------------------------------------------------------------------------------------------------|------------------|------------------|--------------|
|             |                       | <p>response to diacyl bacterial lipopeptide,GO:1900227~positive regulation of NLRP3 inflammasome complex assembly,GO:1990000~amyloid fibril formation,GO:2000121~regulation of removal of superoxide radicals,GO:2000334~positive regulation of blood microparticle formation,GO:2000379~positive regulation of reactive oxygen species metabolic process,GO:2000505~regulation of energy homeostasis</p> |                  |                  |              |

| Gene Symbol  | MPT X FPT fold change | GOTERM_BP_DIRECT                                                                                                                                                                                                                                                                                                                                                                                                                                                                                                                                       | GOTERM_CC_DIRECT                                                                                                                                                                                                                                                                                  | GOTERM_MF_DIRECT                                                                                                      | KEGG_PATHWAY                                                                   |
|--------------|-----------------------|--------------------------------------------------------------------------------------------------------------------------------------------------------------------------------------------------------------------------------------------------------------------------------------------------------------------------------------------------------------------------------------------------------------------------------------------------------------------------------------------------------------------------------------------------------|---------------------------------------------------------------------------------------------------------------------------------------------------------------------------------------------------------------------------------------------------------------------------------------------------|-----------------------------------------------------------------------------------------------------------------------|--------------------------------------------------------------------------------|
| <i>OGN</i>   | -3.06                 | GO:0007409~axonogenesis,GO:0018146~keratan sulfate biosynthetic process,GO:0035385~Roundabout signaling pathway,GO:0042340~keratan sulfate catabolic process,GO:0048662~negative regulation of smooth muscle cell proliferation,GO:0048846~axon extension involved in axon guidance,GO:0050770~regulation of axonogenesis                                                                                                                                                                                                                              | GO:0005576~extracellular region,GO:0005578~proteinaceous extracellular matrix,GO:0005615~extracellular space,GO:0005783~endoplasmic reticulum,GO:0005796~Golgi lumen,GO:0031012~extracellular matrix,GO:0043202~lysosomal lumen,GO:0070062~extracellular exosome,GO:1903561~extracellular vesicle | GO:0005515~protein binding,GO:0008083~growth factor activity,GO:0008201~heparin binding,GO:0048495~Roundabout binding |                                                                                |
| <i>FABP4</i> | -3.52                 | GO:0001816~cytokine production,GO:0006469~negative regulation of protein kinase activity,GO:0006810~transport,GO:0019433~triglyceride catabolic process,GO:0042632~cholesterol homeostasis,GO:0045892~negative regulation of transcription, DNA-templated,GO:0050727~regulation of inflammatory response,GO:0050729~positive regulation of inflammatory response,GO:0050872~white fat cell differentiation,GO:0050873~brown fat cell differentiation,GO:0071285~cellular response to lithium ion,GO:0071356~cellular response to tumor necrosis factor | GO:0005634~nucleus,GO:0005737~cytoplasm,GO:0005811~lipid particle,GO:0005829~cytosol,GO:0070062~extracellular exosome                                                                                                                                                                             | GO:0005215~transporter activity,GO:0005504~fatty acid binding                                                         | hsa03320:PPAR signaling pathway,hsa04923:Regulation of lipolysis in adipocytes |
