# Supplementary material for: Integrated analysis of label-free quantitative proteomics and bioinformatics reveal insights into signaling pathways in male breast cancer
Source: PubMed Central journal article supplement (PMC7926483; doi:10.1590/1678-4685-gmb-2019-0410), 2021-03-01
Supplement: 1415-4757-GMB-44-1-e20190410-suppl7.pdf [file 1415-4757-GMB-44-1-e20190410-suppl7.pdf]

## Supplementary Material to “Integrated analysis of label-free quantitative proteomics and bioinformatics reveal insights into signaling pathways in male breast cancer”

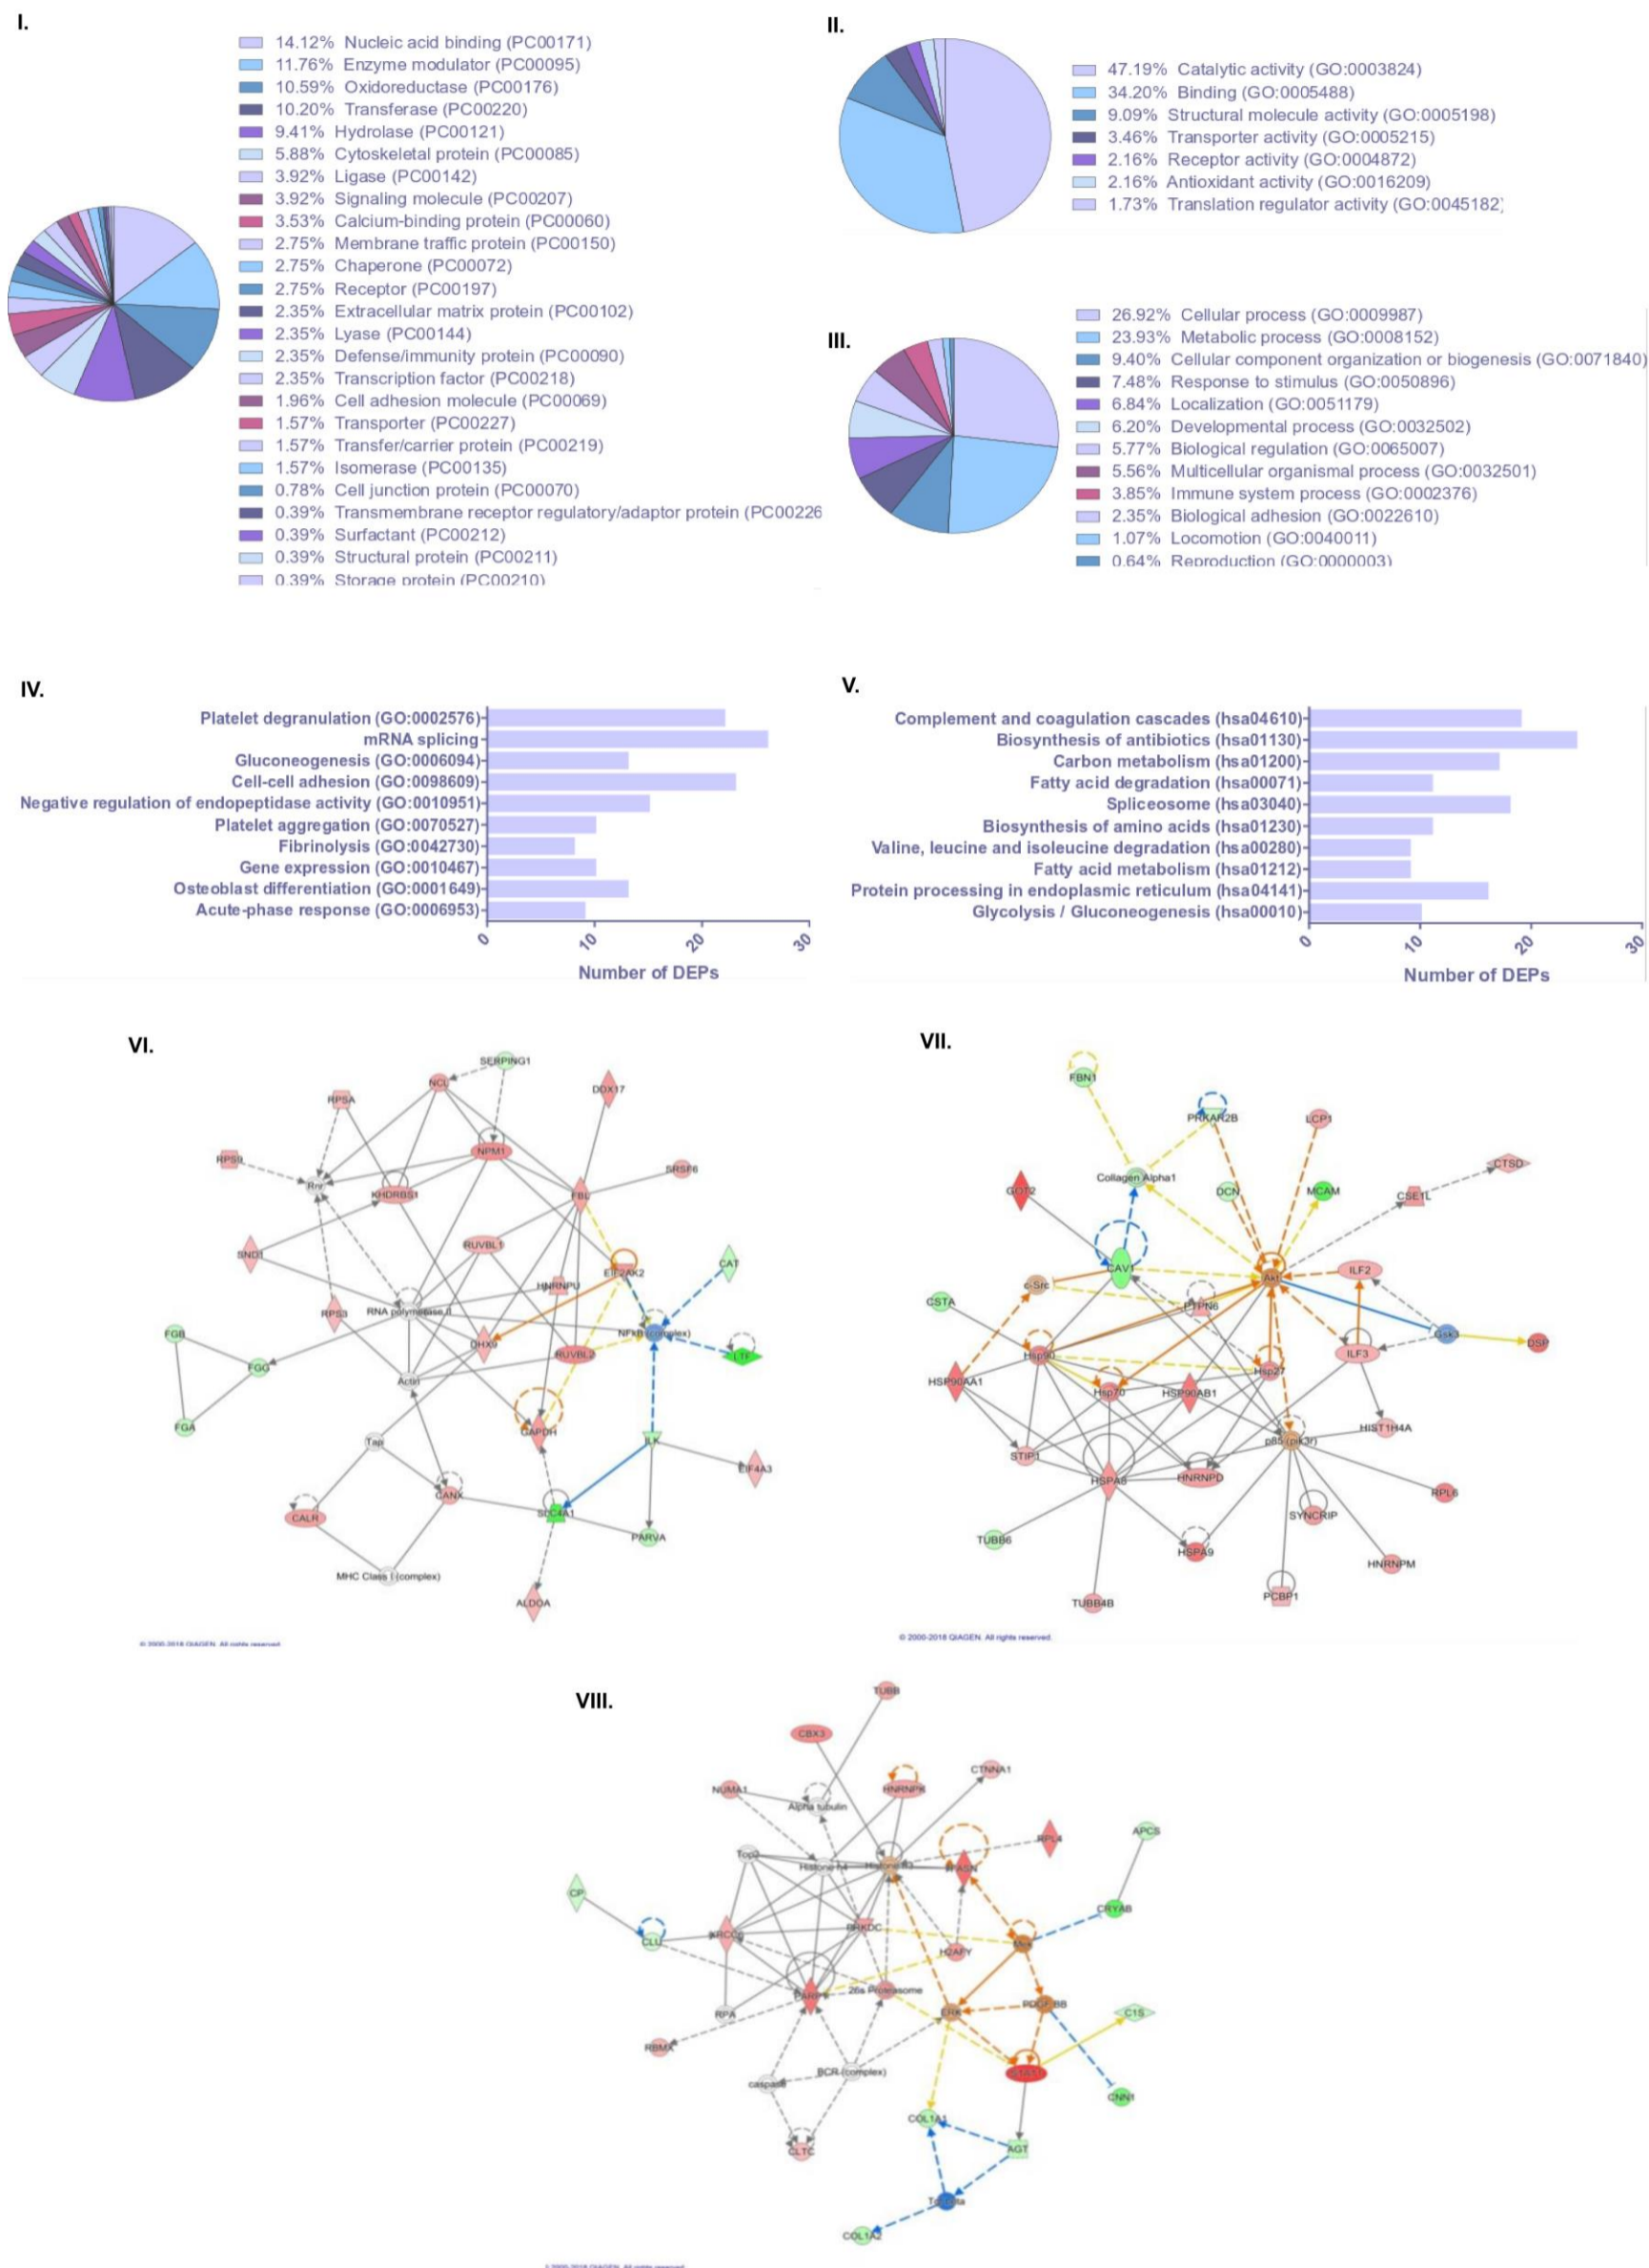

**Figure S2** – Functional annotation of the differentially expressed proteins identified in the MLN x MNT tissues' comparison. According to the functional classification of the PANTHER system v. 13.1, based on the gene ontology (GO) terms: I. Protein class; II. Molecular function; III. Biological process. According to the functional enrichment analysis of the DAVID v. 6.8 database: IV. Top enriched biological processes (GO terms,  $p < 0.05$ ); V. Top enriched KEGG pathways ( $p < 0.05$ ). Predicted protein interactive networks of the differentially expressed proteins identified in the MLN x MNT tissues' comparison (VI-VIII), according to the IPA analysis.
